# Supplementary material for: A tumor-derived type III collagen-rich ECM niche regulates tumor cell dormancy
Source: Research Square preprint supplement (doi:10.21203/rs.3.rs-580847/v1), 2021-06-22
Supplement: Supplementary file 1 [file b64e82a89d1dec449986085f.xlsx]

## Sheet: A. Samples
Sample name	Sample description	Name of spectrum file
D-HEp3 shCTRL #1	Dormant human head-and-neck squamous cell carcinoma xenograft_shCTRL	NabaC0-2-10X
D-HEp3 shCTRL #2	Dormant human head-and-neck squamous cell carcinoma xenograft_shCTRL	NabaC1-1-10X
D-HEp3 shCTRL #3	Dormant human head-and-neck squamous cell carcinoma xenograft_shCTRL	Naba-1-10x_180123194318
D-HEp3 shCTRL #4	Dormant human head-and-neck squamous cell carcinoma xenograft_shCTRL	Naba-2-10x
D-HEp3 shDDR1 #1	Dormant human head-and-neck squamous cell carcinoma xenograft_shDDR1	NabaSh2-4-10X
D-HEp3 shDDR1 #2	Dormant human head-and-neck squamous cell carcinoma xenograft_shDDR1	NabaSh3-2-10X
D-HEp3 shDDR1 #3	Dormant human head-and-neck squamous cell carcinoma xenograft_shDDR1	Naba-3-10x
D-HEp3 shDDR1 #4	Dormant human head-and-neck squamous cell carcinoma xenograft_shDDR1	Naba-4-10x

## Sheet: B. Complete MS output
Matrisome Division	Matrisome Category	Gene Symbol	Species	UniProt accession_number	entry_name	UniProt accession_numbers	NabaC0-2-10X unique_peptides	NabaC1-1-10X unique_peptides	NabaSh2-4-10X unique_peptides	NabaSh3-2-10X unique_peptides	Naba-1-10x_180123194318 unique_peptides	Naba-2-10x unique_peptides	Naba-3-10x unique_peptides	Naba-4-10x unique_peptides	NabaC0-2-10X numSpectra	NabaC1-1-10X numSpectra	NabaSh2-4-10X numSpectra	NabaSh3-2-10X numSpectra	Naba-1-10x_180123194318 numSpectra	Naba-2-10x numSpectra	Naba-3-10x numSpectra	Naba-4-10x numSpectra	NabaC0-2-10X totalIntensity	NabaC1-1-10X totalIntensity	NabaSh2-4-10X totalIntensity	NabaSh3-2-10X totalIntensity	Naba-1-10x_180123194318 totalIntensity	Naba-2-10x totalIntensity	Naba-3-10x totalIntensity	Naba-4-10x totalIntensity	protein_mw	percentCoverage	scoreUnique	scoreUniqueSubgroupSpecificCI
Core matrisome	ECM Glycoproteins	Emilin1	MOUSE	Q99K41	EMILIN-1	Q99K41	0	0	0	0	2	1	1	2	0	0	0	0	3	1	1	6	0	0	0	0	2370000	5440000	4660000	3740000	108895	4	19.5	19.5
Core matrisome	ECM Glycoproteins	Fbn1	MOUSE	A2AQ53	Fibrillin-1	A2AQ53|P35555|F6U495|P35556|E9PHW4|Q61555	0	1	0	1	7	4	8	3	0	1	0	1	8	6	14	3	0	1300000	0	264000	31300000	26500000	115000000	8170000	332890	24.3	637.28	128.2
Core matrisome	ECM Glycoproteins	Fbn1	MOUSE	Q61554	Fibrillin-1	Q61554	0	0	0	0	0	0	1	0	0	0	0	0	0	0	1	0	0	0	0	0	0	0	32000000	0	332858	20.4	520.63	11.55
Core matrisome	ECM Glycoproteins	Fga	MOUSE	E9PV24	Protein Fga	E9PV24|Q99K47	15	16	11	13	12	15	16	13	42	31	32	51	20	31	45	22	658000000	375000000	299000000	591000000	233000000	1150000000	1370000000	341000000	88169.4	41.1	292.69	292.69
Core matrisome	ECM Glycoproteins	FGB	HUMAN	P02675	Fibrinogen beta chain	P02675|D6REL8	0	0	0	0	0	1	0	0	0	0	0	0	0	1	0	0	0	0	0	0	0	7100000	0	0	56611.8	22.1	117.14	6.72
Core matrisome	ECM Glycoproteins	Fgb	MOUSE	Q8K0E8	Fibrinogen beta chain	Q8K0E8	14	15	8	15	11	16	18	11	37	30	23	34	24	37	51	25	566000000	283000000	228000000	556000000	228000000	1290000000	1870000000	276000000	55436.4	61.5	417.13	306.71
Core matrisome	ECM Glycoproteins	Fgg	MOUSE	Q8VCM7	Fibrinogen gamma chain	Q8VCM7|C9JC84|P02679|C9JEU5|P02679-2	9	5	5	8	10	11	13	10	21	10	9	20	14	28	44	15	216000000	94000000	66900000	195000000	552000000	1590000000	2500000000	669000000	50075.2	46.7	221.2	221.2
Core matrisome	ECM Glycoproteins	FN1	HUMAN	P02751	Fibronectin	P02751|P02751-3|P02751-17|P02751-5|P02751-15|P02751-7|P02751-6|P02751-8|P02751-14|P02751-9|P02751-10|P02751-11|P02751-13|P02751-4|P02751-12|P02751-16|P02751-2	10	18	8	25	15	22	26	22	15	29	11	47	20	38	52	35	73700000	202000000	41000000	407000000	158000000	630000000	904000000	412000000	266214	38.3	877.92	481.05
Core matrisome	ECM Glycoproteins	Fn1	MOUSE	P11276	Fibronectin	P11276	10	14	8	23	14	20	25	14	14	17	10	39	18	30	47	20	65400000	75800000	42900000	206000000	138000000	541000000	962000000	293000000	276185	36	842.25	445.38
Core matrisome	ECM Glycoproteins	LTBP1	HUMAN	Q14766-4	Isoform 4 of Latent-transforming growth factor beta-binding protein 1	Q14766-4|Q14766|Q14766-5|Q14766-2|E7EV71|Q14766-3|C9JD84|Q8CG19|Q8CG19-2|Q8CG19-3	0	0	0	0	2	2	3	2	0	0	0	0	2	2	4	2	0	0	0	0	5760000	9500000	27600000	7140000	195308	3.1	47.25	47.25
Core matrisome	ECM Glycoproteins	Postn	MOUSE	Q62009	Periostin	Q62009|Q62009-2|Q62009-3|Q62009-5|Q62009-4|Q15063|Q15063-5|B1ALD9|Q15063-3|Q15063-2|Q15063-4|Q15063-6|Q15063-7	10	13	9	22	16	12	20	16	11	21	10	55	28	15	32	30	59700000	142000000	48400000	445000000	173000000	105000000	284000000	183000000	93826.5	40.4	333.52	333.52
Core matrisome	ECM Glycoproteins	Tgfbi	MOUSE	P82198	Transforming growth factor-beta-induced protein ig-h3	P82198|Q15582|D6RBX4	4	6	5	4	5	9	11	6	4	6	5	4	7	13	14	7	9880000	44100000	14300000	17700000	25700000	88000000	101000000	20700000	75223.3	26.2	176.13	176.13
Core matrisome	ECM Glycoproteins	THBS1	HUMAN	P07996	Thrombospondin-1	P07996|P07996-2|Q80YQ1|P35441	1	3	0	1	0	4	3	0	1	3	0	1	0	4	3	0	1240000	3550000	0	551000	0	16300000	13200000	0	133374	6.4	53.99	53.99
Core matrisome	ECM Glycoproteins	TNC	HUMAN	P24821-4	Isoform 4 of Tenascin	P24821-4|J3QSU6|E9PC84|P24821-2|F5H7V9|P24821-6	0	3	2	3	1	2	2	2	0	3	2	3	1	2	3	3	0	4660000	2510000	10000000	4550000	12600000	21500000	20300000	236511	19.4	301.84	53.3
Core matrisome	ECM Glycoproteins	TNC	HUMAN	P24821-5	Isoform 5 of Tenascin	P24821-5	0	0	0	0	1	1	1	1	0	0	0	0	1	2	3	3	0	0	0	0	1210000	5720000	4780000	2340000	187173	21.3	252.28	15.68
Core matrisome	ECM Glycoproteins	Tnc	MOUSE	Q80YX1-2	Isoform 2 of Tenascin	Q80YX1-2|Q80YX1-3|Q80YX1-4|Q80YX1-5|Q80YX0	0	0	0	1	1	1	1	1	0	0	0	1	2	1	2	2	0	0	0	5130000	19000000	20700000	16500000	14200000	227523	21.2	415.15	13.97
Core matrisome	ECM Glycoproteins	Tnc	MOUSE	Q80YX1	Tenascin	Q80YX1	0	1	0	0	0	0	0	0	0	1	0	0	0	0	0	0	0	381000	0	0	0	0	0	0	237451	19.7	405.3	4.12
Core matrisome	ECM Glycoproteins	Vtn	MOUSE	P29788	Vitronectin	P29788	1	3	1	1	1	4	4	1	1	3	1	1	1	4	5	1	1130000	7210000	1370000	6040000	1570000	28800000	33100000	1890000	55646.8	20.7	63.98	63.98
Core matrisome	Collagens	Col10a1	MOUSE	Q05306	Collagen alpha-1(X) chain	Q05306	2	0	0	2	1	2	2	1	2	0	0	2	2	4	3	2	12800000	0	0	11500000	56100000	1350000000	187000000	108000000	66831.3	17.6	34.39	34.39
Core matrisome	Collagens	COL11A1	HUMAN	P12107-2	Isoform B of Collagen alpha-1(XI) chain	P12107-2|P12107|P12107-3|P12107-4	0	0	0	0	1	1	1	2	0	0	0	0	4	3	3	6	0	0	0	0	36300000	31100000	32000000	36700000	183046	10.6	105.76	14.27
Core matrisome	Collagens	Col11a1	MOUSE	Q61245	Collagen alpha-1(XI) chain	Q61245|Q61245-2	0	0	0	0	0	0	0	1	0	0	0	0	0	0	0	1	0	0	0	0	0	0	0	2480000	181656	9.7	103.6	12.11
Core matrisome	Collagens	COL11A2	HUMAN	P13942	Collagen alpha-2(XI) chain	P13942|P13942-3|P13942-2|P13942-5|P13942-4|P13942-7|P13942-6|Q4VXY6|P13942-8|H0YIS1	0	0	0	0	0	0	0	1	0	0	0	0	0	0	0	1	0	0	0	0	0	0	0	1460000	172586	7.5	46.1	4.78
Core matrisome	Collagens	Col11a2	MOUSE	Q64739	Collagen alpha-2(XI) chain	Q64739|Q64739-3|Q64739-4|Q64739-6|Q64739-5|Q64739-1|Q64739-7	0	0	0	0	0	0	1	0	0	0	0	0	0	0	1	0	0	0	0	0	0	0	644000	0	172331	6.9	46.04	4.72
Core matrisome	Collagens	COL12A1	HUMAN	D6RGG3	Collagen alpha-1(XII) chain	D6RGG3|Q99715|Q99715-4|Q99715-2	1	1	1	1	1	1	3	1	1	1	1	1	2	2	4	2	18200000	23900000	16000000	14200000	423000000	508000000	550000000	543000000	334394	15.3	377.95	34.69
Core matrisome	Collagens	Col12a1	MOUSE	Q60847	Collagen alpha-1(XII) chain	Q60847|Q60847-5|E9PX70|Q60847-2|Q60847-3|Q60847-4	11	20	14	14	16	21	26	22	11	22	15	18	21	30	38	26	38800000	91900000	39000000	80300000	372000000	1250000000	659000000	345000000	341406	30.8	795.6	452.34
Core matrisome	Collagens	COL16A1	HUMAN	Q07092	Collagen alpha-1(XVI) chain	Q07092|Q07092-2|Q8BLX7-2|A6NCT7	0	0	0	0	1	3	1	1	0	0	0	0	1	3	1	1	0	0	0	0	9030000	55000000	6810000	9640000	159574	10.5	57.27	25.64
Core matrisome	Collagens	Col16a1	MOUSE	Q8BLX7	Collagen alpha-1(XVI) chain	Q8BLX7	0	0	0	0	0	1	0	0	0	0	0	0	0	1	0	0	0	0	0	0	0	2590000	0	0	157628	7.1	36.96	5.33
Core matrisome	Collagens	Col18a1	MOUSE	E9QPX1	Collagen alpha-1(XVIII) chain	E9QPX1|P39061|P39061-1|P39061-2	0	0	0	0	0	2	1	2	0	0	0	0	0	2	1	3	0	0	0	0	0	44100000	19800000	49700000	183320	5.1	15.86	15.86
Core matrisome	Collagens	COL19A1	HUMAN	Q14993	Collagen alpha-1(XIX) chain	Q14993	0	0	0	0	2	1	0	0	0	0	0	0	2	1	0	0	0	0	0	0	57700000	4750000	0	0	116017	9.1	17.32	17.32
Core matrisome	Collagens	COL1A1	HUMAN	P02452	Collagen alpha-1(I) chain	P02452	1	3	2	6	4	6	3	3	1	3	4	6	6	8	4	3	6160000	39100000	15100000	65500000	482000000	637000000	267000000	65900000	139966	42.6	726.82	104.79
Core matrisome	Collagens	Col1a1	MOUSE	P11087	Collagen alpha-1(I) chain	P11087|P11087-2	37	33	41	31	43	36	41	40	229	180	237	335	1050	712	728	978	12800000000	11500000000	8430000000	29400000000	119000000000	133000000000	114000000000	132000000000	139057	63.7	1535.34	930.11
Core matrisome	Collagens	COL1A2	HUMAN	P08123	Collagen alpha-2(I) chain	P08123	1	2	0	2	3	2	1	2	2	2	0	4	6	3	2	5	10800000	1740000	0	40100000	421000000	1110000000	296000000	570000000	129825	24.9	289.04	31.14
Core matrisome	Collagens	Col1a2	MOUSE	Q01149	Collagen alpha-2(I) chain	Q01149	41	44	44	45	49	47	52	50	233	206	233	388	726	541	588	679	9600000000	9520000000	6030000000	23000000000	69500000000	80000000000	68000000000	74500000000	130068	70.6	1218.15	960.25
Core matrisome	Collagens	COL22A1	HUMAN	Q8NFW1	Collagen alpha-1(XXII) chain	Q8NFW1|Q8NFW1-2|Q8NFW1-3	0	0	0	0	1	2	1	3	0	0	0	0	1	2	1	3	0	0	0	0	1320000	49900000	41100000	67300000	162169	4.7	18.93	18.93
Core matrisome	Collagens	COL2A1	HUMAN	P02458	Collagen alpha-1(II) chain	P02458|P02458-1	0	0	0	1	0	1	2	1	0	0	0	1	0	2	2	1	0	0	0	196000	0	27000000	18000000	2620000	142867	15.4	132.31	15.44
Core matrisome	Collagens	Col2a1	MOUSE	P28481	Collagen alpha-1(II) chain	P28481|P28481-1|P28481-4|P28481-5|P28481-6|P28481-7|P28481-2	1	1	1	1	2	0	2	1	1	1	1	1	2	0	3	1	291000	10300000	229000	1260000	20000000	0	16600000	38200000	143055	19.5	134.66	31.98
Core matrisome	Collagens	COL3A1	HUMAN	P02461	Collagen alpha-1(III) chain	P02461|E7ENY8|P02461-2	1	2	1	2	4	6	5	7	1	2	1	2	5	8	8	8	17600000	28200000	1720000	12500000	152000000	298000000	145000000	221000000	139817	31	365.86	98.01
Core matrisome	Collagens	Col3a1	MOUSE	P08121	Collagen alpha-1(III) chain	P08121	49	49	55	47	54	52	57	61	292	257	247	404	631	526	481	603	9760000000	8360000000	4220000000	17600000000	57800000000	69600000000	52100000000	63100000000	140196	63.5	1409.19	1159.72
Core matrisome	Collagens	COL4A1	HUMAN	P02462	Collagen alpha-1(IV) chain	P02462|P02462-2	2	1	0	1	1	3	2	1	2	1	0	1	1	3	2	1	20800000	6240000	0	13000000	15200000	28400000	19900000	20000000	161753	9	48.14	31.32
Core matrisome	Collagens	Col4a1	MOUSE	P02463	Collagen alpha-1(IV) chain	P02463	3	2	2	1	2	5	2	3	3	3	2	1	5	7	4	7	7010000	15000000	4240000	10100000	105000000	648000000	104000000	172000000	161817	11.7	86.79	55.91
Core matrisome	Collagens	COL4A2	HUMAN	P08572	Collagen alpha-2(IV) chain	P08572|P20849|P20849-2	0	1	1	1	1	0	0	0	0	1	1	2	1	0	0	0	0	2180000	7030000	16000000	10800000	0	0	0	168748	2.8	38.21	15.01
Core matrisome	Collagens	Col4a2	MOUSE	P08122	Collagen alpha-2(IV) chain	P08122	4	5	3	4	6	5	5	6	4	5	3	4	6	5	6	7	19300000	20100000	9510000	31100000	43300000	58300000	44100000	68200000	168520	7.9	115.32	92.12
Core matrisome	Collagens	COL4A3	HUMAN	Q01955	Collagen alpha-3(IV) chain	Q01955|Q01955-2|Q01955-3|Q01955-4|Q01955-5	0	0	0	0	1	1	0	2	0	0	0	0	2	1	0	2	0	0	0	0	145000000	1060000	0	1230000	163179	8.2	23.31	23.31
Core matrisome	Collagens	Col4a4	MOUSE	Q9QZR9	Collagen alpha-4(IV) chain	Q9QZR9|Q9QZR9-2	3	0	0	2	0	0	0	0	3	0	0	2	0	0	0	0	7090000	0	0	31100000	0	0	0	0	166148	5.5	18.23	18.23
Core matrisome	Collagens	Col5a1	MOUSE	O88207	Collagen alpha-1(V) chain	O88207|P20908	6	7	4	5	6	6	9	5	8	11	4	9	10	11	16	9	97100000	166000000	53500000	118000000	692000000	1180000000	1310000000	634000000	184358	14.7	229.41	162.35
Core matrisome	Collagens	COL5A2	HUMAN	P05997	Collagen alpha-2(V) chain	P05997	0	0	0	0	1	0	1	0	0	0	0	0	1	0	1	0	0	0	0	0	267000	0	213000	0	145878	28.6	328.22	9.19
Core matrisome	Collagens	Col5a2	MOUSE	Q3U962	Collagen alpha-2(V) chain	Q3U962	7	6	4	7	9	9	9	8	10	9	6	11	12	12	15	14	52100000	42500000	26600000	149000000	366000000	484000000	549000000	510000000	146043	42.4	510.6	191.57
Core matrisome	Collagens	COL5A3	HUMAN	P25940	Collagen alpha-3(V) chain	P25940	0	0	1	0	0	0	0	1	0	0	1	0	0	0	0	1	0	0	293000	0	0	0	0	503000	172802	6.3	62.44	9.78
Core matrisome	Collagens	Col5a3	MOUSE	Q9JLI2	Collagen type V alpha 3 chain	Q9JLI2	5	6	2	5	7	5	4	6	5	6	2	10	9	6	5	7	17500000	26800000	6780000	37500000	102000000	93200000	63500000	59900000	172707	13.5	182.35	129.69
Core matrisome	Collagens	COL6A1	HUMAN	P12109	Collagen alpha-1(VI) chain	P12109	0	0	0	0	0	1	2	1	0	0	0	0	0	2	3	1	0	0	0	0	0	1760000	2670000	447000	109668	8.1	61.7	18.78
Core matrisome	Collagens	Col6a1	MOUSE	Q04857	Collagen alpha-1(VI) chain	Q04857	8	14	4	9	12	14	13	8	11	22	5	13	14	18	15	9	32700000	141000000	14000000	50400000	95800000	246000000	179000000	39600000	109629	30.2	300.66	257.74
Core matrisome	Collagens	COL6A2	HUMAN	P12110	Collagen alpha-2(VI) chain	P12110|P12110-2|P12110-3	0	1	0	0	0	1	4	1	0	1	0	0	0	1	5	1	0	2130000	0	0	0	6610000	22800000	2170000	109776	16.5	133.31	55.45
Core matrisome	Collagens	Col6a2	MOUSE	Q02788	Collagen alpha-2(VI) chain	Q02788|D3Z7D5	0	11	2	2	6	10	6	6	0	13	2	3	13	17	13	9	0	104000000	3480000	14700000	69500000	206000000	133000000	47200000	111473	25	230.3	152.44
Core matrisome	Collagens	COL6A3	HUMAN	P12111	Collagen alpha-3(VI) chain	P12111|E7ENL6|P12111-2|P12111-4|P12111-5|P12111-3	0	2	0	0	0	4	5	3	0	2	0	0	0	4	6	3	0	1260000	0	0	0	14000000	21300000	6780000	345375	8.5	268.79	79.98
Core matrisome	Collagens	Col6a3	MOUSE	E9PWQ3	Protein Col6a3	E9PWQ3	0	1	0	0	2	3	3	1	0	1	0	0	2	4	3	1	0	1220000	0	0	1050000	15600000	12000000	4340000	355523	24.9	770.2	43.36
Core matrisome	Collagens	Col6a3	MOUSE	J3QQ16	Protein Col6a3	J3QQ16	1	2	1	1	1	1	1	1	3	4	3	4	3	2	2	3	21100000	34000000	15200000	22100000	66500000	91200000	62500000	59400000	290174	27.8	739.71	28.36
Core matrisome	Collagens	Col7a1	MOUSE	Q63870	Collagen alpha-1(VII) chain	Q63870	1	1	1	1	0	0	0	0	1	1	2	1	0	0	0	0	1580000	1070000	1390000	4400000	0	0	0	0	296254	0.7	19.01	7.04
Core matrisome	Proteoglycans	BGN	HUMAN	P21810	Biglycan	P21810|P28653	0	0	0	0	1	3	3	0	0	0	0	0	1	4	3	0	0	0	0	0	696000	6340000	3420000	0	42052.7	12.7	45.17	45.17
Matrisome-associated	ECM Regulators	F2	MOUSE	P19221	Prothrombin	P19221|H7BX99|P00734|E9PIT3	0	0	0	0	0	2	2	0	0	0	0	0	0	2	2	0	0	0	0	0	0	1140000	6320000	0	71693.8	3.8	21.99	21.99
Matrisome-associated	ECM Regulators	Itih4	MOUSE	A6X935	Inter alpha-trypsin inhibitor, heavy chain 4	A6X935|E9PVD2|E9Q5L2|A6X935-2	2	3	0	0	0	1	1	0	2	3	0	0	0	1	1	0	1420000	3580000	0	0	0	3740000	4660000	0	104829	4.8	33.67	33.67
Matrisome-associated	ECM Regulators	Plg	MOUSE	P20918	Plasminogen	P20918	2	2	2	1	6	9	12	6	2	2	2	1	6	11	18	6	45000000	5460000	4210000	1620000	24700000	166000000	301000000	34600000	93544.9	30.5	214.89	214.89
Matrisome-associated	ECM Regulators	Serping1	MOUSE	P97290	Plasma protease C1 inhibitor	P97290|A2ATR8	1	3	0	0	0	0	0	0	1	3	0	0	0	0	0	0	1050000	4710000	0	0	0	0	0	0	55868.8	5.9	22.94	22.94
Matrisome-associated	ECM Regulators	SERPINH1	HUMAN	P50454	Serpin H1	P50454|E9PPV6|E9PKH2	0	0	0	0	0	1	1	0	0	0	0	0	0	1	1	0	0	0	0	0	0	2000000	1410000	0	46553.8	14.3	45.94	21.34
Matrisome-associated	ECM Regulators	Serpinh1	MOUSE	P19324	Serpin H1	P19324	0	0	0	0	0	1	1	0	0	0	0	0	0	1	1	0	0	0	0	0	0	3870000	2800000	0	46646.9	14.3	44.96	20.36
Matrisome-associated	ECM Regulators	Tgm2	MOUSE	P21981	Protein-glutamine gamma-glutamyltransferase 2	P21981|G3UXE8|P21980	2	6	2	1	3	6	5	2	2	6	2	1	4	7	6	3	2400000	12900000	1870000	304000	15000000	43600000	26400000	14400000	78200.7	16.3	89.38	89.38
Matrisome-associated	ECM Regulators	TIMP1	HUMAN	P01033	Metalloproteinase inhibitor 1	P01033|Q5H9B5|Q5H9A7	1	2	0	0	0	0	1	0	1	2	0	0	0	0	1	0	412000	5110000	0	0	0	0	6720000	0	23855.1	13	23.78	23.78
Matrisome-associated	Secreted Factors	S100A11	HUMAN	P31949	Protein S100-A11	P31949|P50543	0	0	0	0	0	0	2	0	0	0	0	0	0	0	2	0	0	0	0	0	0	0	3670000	0	11854.4	19	18.2	18.2
Matrisome-associated	Secreted Factors	S100a8	MOUSE	P27005	Protein S100-A8	P27005	0	0	0	0	1	1	1	1	0	0	0	0	2	3	2	1	0	0	0	0	3440000	4360000	3650000	2550000	10351.5	22.4	18.04	18.04
Matrisome-associated	Secreted Factors	S100a9	MOUSE	P31725	Protein S100-A9	P31725	1	3	2	2	1	1	1	1	3	6	4	7	2	2	2	2	22000000	63900000	13700000	43800000	9690000	15300000	18700000	7640000	13219.8	38	46.58	46.58
Matrisome-associated	ECM-affiliated Proteins	ANXA1	HUMAN	P04083	Annexin A1	P04083	1	4	1	1	1	2	2	1	3	5	2	2	1	4	3	1	26400000	53600000	19300000	19500000	13400000	122000000	90300000	22600000	38941.8	30.6	103.73	37.71
Matrisome-associated	ECM-affiliated Proteins	Anxa1	MOUSE	P10107	Annexin A1	P10107	4	7	4	3	4	7	11	5	5	9	4	3	4	10	13	5	15200000	41800000	8200000	10800000	19800000	139000000	151000000	31000000	39018.9	56.9	225.92	151.87
Matrisome-associated	ECM-affiliated Proteins	ANXA2	HUMAN	P07355	Annexin A2	P07355|A6NMY6|P07355-2|H0YMU9|H0YLV6|H0YKN4	1	2	0	0	0	0	0	0	1	2	0	0	0	0	0	0	1740000	4310000	0	0	0	0	0	0	38831.6	37.1	127.69	16.47
Matrisome-associated	ECM-affiliated Proteins	Anxa2	MOUSE	P07356	Annexin A2	P07356	1	1	0	0	0	0	0	0	1	1	0	0	0	0	0	0	1360000	317000	0	0	0	0	0	0	38960.8	33.6	120.51	9.29
Matrisome-associated	ECM-affiliated Proteins	Anxa6	MOUSE	P14824	Annexin A6	P14824|F8WIT2	0	0	0	0	0	1	2	0	0	0	0	0	0	2	2	0	0	0	0	0	0	2500000	1000000	0	76340.4	8.3	18.74	18.74
Matrisome-associated	ECM-affiliated Proteins	LGALS1	HUMAN	P09382	Galectin-1	P09382|F8WEI7	2	5	2	0	2	4	5	1	2	5	2	0	3	5	8	1	4710000	17600000	2720000	0	24000000	112000000	138000000	3560000	15057.8	71.8	100.22	83.72
Matrisome-associated	ECM-affiliated Proteins	Lgals1	MOUSE	P16045	Galectin-1	P16045	0	0	0	0	1	1	1	1	0	0	0	0	2	2	2	2	0	0	0	0	5170000	12800000	9150000	2810000	15207.9	28.1	36.02	19.52
		2018-09-02	HUMAN	Q15019-2	Isoform 2 of Septin-2	Q15019-2|Q15019-3|Q15019|B5MCX3|P42208|E9Q3V6	1	2	1	0	1	1	1	1	1	2	1	0	1	1	1	1	1210000	4620000	570000	0	634000	2190000	1680000	840000	45745.4	6.5	27.14	27.14
		2018-09-07	HUMAN	Q16181	Septin-7	Q16181|E7ES33|Q16181-2|E7EPK1|G3V1Q4|E9Q9F5|E9Q1G8|O55131|Q92599|F8W8I8|Q92599-4|A6NFQ9|Q9NVA2-2|Q6ZU15|A6NMH6|Q14141|Q92599-2|B1AMS2|Q14141-4|Q14141-2|Q92599-3|Q14141-3|B1AQZ0|Q8C650|B1AQY9|B7ZC46|Q8C650-2|Q8CHH9-2|Q9DA97|Q8CHH9|S4R2P6	1	2	0	0	0	0	0	0	1	2	0	0	0	0	0	0	1450000	3020000	0	0	0	0	0	0	50964.3	7.5	29.99	19.68
		2018-09-09	HUMAN	Q9UHD8	Septin-9	Q9UHD8|Q9UHD8-5|Q9UHD8-2|Q9UHD8-7|Q9UHD8-8|Q9UHD8-3|Q9UHD8-9|Q9UHD8-4|Q80UG5|Q80UG5-3|A2A6U3|Q80UG5-2	0	2	0	0	0	0	0	0	0	2	0	0	0	0	0	0	0	2250000	0	0	0	0	0	0	65685.6	4.4	19.7	19.7
		2018-09-11	HUMAN	D6RER5	Septin-11	D6RER5|Q9NVA2|D6RGI3|Q8C1B7|Q8C1B7-2|Q8C1B7-3	1	1	0	0	0	0	0	0	1	1	0	0	0	0	0	0	1590000	3070000	0	0	0	0	0	0	50150.2	5	18.08	7.77
		AARS	HUMAN	P49588	Alanine--tRNA ligase, cytoplasmic	P49588|Q8BGQ7	0	0	0	0	0	1	1	0	0	0	0	0	0	1	1	0	0	0	0	0	0	1180000	4490000	0	107550	2.6	19.07	19.07
		ABCE1	HUMAN	P61221	ATP-binding cassette sub-family E member 1	P61221|P61222|D6R9I9	1	3	1	1	0	1	3	0	1	3	1	1	0	1	3	0	1370000	5230000	684000	1200000	0	2370000	4150000	0	68283	14.5	69.25	69.25
		ACADVL	HUMAN	P49748-3	Isoform 3 of Very long-chain specific acyl-CoA dehydrogenase, mitochondrial	P49748-3|P49748|P49748-2	1	4	1	1	1	3	2	0	1	4	1	1	1	4	2	0	1740000	8470000	1150000	544000	662000	13500000	5820000	0	73325.2	12.9	77.87	77.87
		ACOT7	HUMAN	O00154-4	Isoform 4 of Cytosolic acyl coenzyme A thioester hydrolase	O00154-4|O00154-3|O00154-2|O00154|O00154-7|O00154-5|O00154-6|B4DUX0|E9PYH2|Q91V12|Q91V12-4|Q91V12-3|Q91V12-2	1	3	0	0	0	2	2	2	1	3	0	0	0	2	2	2	2220000	6160000	0	0	0	20300000	12400000	3820000	37818.4	15.6	33.5	33.5
		ACOT9	HUMAN	Q9Y305-4	Isoform 4 of Acyl-coenzyme A thioesterase 9, mitochondrial	Q9Y305-4|Q9Y305|Q9Y305-2|Q9Y305-3|Q9R0X4|Q32MW3|C9J7L8	0	2	1	0	0	0	0	0	0	2	1	0	0	0	0	0	0	1950000	139000	0	0	0	0	0	51306.3	6	21.49	21.49
		ACSL4	HUMAN	O60488	Long-chain-fatty-acid--CoA ligase 4	O60488|O60488-2|Q9QUJ7|Q9QUJ7-2|O95573	0	0	0	0	0	1	2	1	0	0	0	0	0	1	3	1	0	0	0	0	0	2120000	17200000	13500000	80270.7	4.3	21.83	21.83
		ACTB	HUMAN	P60709	Actin, cytoplasmic 1	P60709|P60710|E9Q1F2|G5E9R0|Q6S8J3|A5A3E0|P0CG38|Q8BFZ3|Q562R1|P0CG39|Q9BYX7|F8WCH0|V9GXQ2	1	1	1	1	1	1	1	1	6	8	6	6	8	7	12	9	44900000	40600000	23100000	24700000	90700000	231000000	246000000	119000000	42078.3	55.2	292.9	21.19
		ACTC1	HUMAN	P68032	Actin, alpha cardiac muscle 1	P68032|P68033|P62736|P63267|P62737|P63268|P68133|P68134|A6NL76|Q5T8M8|Q5T8M7|P63267-2|B8ZZJ2|F8WB63	1	3	0	1	2	2	3	2	1	3	0	2	2	3	4	2	3330000	15500000	0	34200000	10700000	77900000	50600000	18800000	42360.6	44.8	217.39	46.15
		ACTG1	HUMAN	P63261	Actin, cytoplasmic 2	P63261|P63260|B1ATY1|J3KT65|G3UYG0	1	1	0	1	1	1	1	1	1	1	0	1	3	4	6	4	2470000	2300000	0	936000	9020000	19700000	22200000	11200000	42134.4	55.2	291.84	20.13
		ACTN1	HUMAN	P12814-4	Isoform 4 of Alpha-actinin-1	P12814-4|P12814-3|P12814|P12814-2|Q7TPR4|A1BN54|H9KV75|P35609-2|P35609|Q08043|Q9JI91|O88990|D3YY95	1	2	1	0	0	0	0	0	1	2	1	0	0	0	0	0	1020000	2450000	848000	0	0	0	0	0	107710	6.6	43.72	18.55
		ACTN4	HUMAN	O43707	Alpha-actinin-4	O43707|P57780|O43707-2|F5GXS2|O43707-3	1	7	0	0	0	0	0	0	1	7	0	0	0	0	0	0	2350000	15600000	0	0	0	0	0	0	105309	14.7	65.39	40.22
		ACTR1A	HUMAN	P61163	Alpha-centractin	P61163|R4GMT0|P61164|P42025|Q8R5C5	0	0	0	0	0	0	2	0	0	0	0	0	0	0	2	0	0	0	0	0	0	0	3450000	0	42727.1	8.2	16.22	16.22
		ACTR2	HUMAN	P61160	Actin-related protein 2	P61160|P61161|P61160-2|F5H6T1	1	2	0	0	0	0	0	0	1	2	0	0	0	0	0	0	1370000	3640000	0	0	0	0	0	0	45045.2	6	17.96	17.96
		ADH5	HUMAN	P11766	Alcohol dehydrogenase class-3	P11766|D6RFE4|P28474	0	0	0	0	0	0	1	0	0	0	0	0	0	0	1	0	0	0	0	0	0	0	3020000	0	40579.3	4.5	15.47	15.47
		AHNAK	HUMAN	Q09666	Neuroblast differentiation-associated protein AHNAK	Q09666|E9Q616	3	5	1	0	1	5	1	1	3	5	1	0	1	5	1	1	7910000	8650000	1150000	0	3730000	30600000	9300000	4920000	629604	2.6	108.49	82.29
		Ahsg	MOUSE	P29699	Alpha-2-HS-glycoprotein	P29699	2	3	2	1	2	5	5	3	3	4	3	2	2	7	8	3	15800000	39200000	6880000	25700000	12400000	182000000	172000000	41000000	38123.7	23.1	81.2	81.2
		AIMP2	HUMAN	Q13155	Aminoacyl tRNA synthase complex-interacting multifunctional protein 2	Q13155|F8W950|A8MU58	0	0	0	0	0	1	1	0	0	0	0	0	0	1	1	0	0	0	0	0	0	361000	3690000	0	35690.5	11.8	19.2	19.2
		ALB	BOVIN	P02769	Serum albumin	P02769	0	1	0	2	0	0	0	0	0	1	0	5	0	0	0	0	0	2750000	0	20200000	0	0	0	0	71289	6	38.48	31.88
		Alb	MOUSE	P07724	Serum albumin	P07724	2	4	2	0	0	0	0	0	2	4	2	0	0	0	0	0	5290000	10100000	2930000	0	0	0	0	0	70745.2	10	39.16	32.56
		ALDH18A1	HUMAN	P54886	Delta-1-pyrroline-5-carboxylate synthase	P54886|P54886-2|Q9Z110|Q9Z110-2	0	0	0	0	0	1	1	0	0	0	0	0	0	1	1	0	0	0	0	0	0	2300000	1800000	0	88042.4	1.5	15.19	15.19
		Aldh2	MOUSE	P47738	Aldehyde dehydrogenase, mitochondrial	P47738|P05091|P05091-2	0	0	0	0	2	1	5	1	0	0	0	0	2	1	7	1	0	0	0	0	3000000	9580000	24800000	2810000	57050	24	65.7	65.7
		ALDH7A1	HUMAN	P49419	Alpha-aminoadipic semialdehyde dehydrogenase	P49419|P49419-2|P49419-4|F8VS02|P49419-3|Q9DBF1|Q9DBF1-2|G3UYR8	0	0	0	0	1	1	2	1	0	0	0	0	1	1	2	1	0	0	0	0	960000	2370000	3430000	1190000	59056.6	9.8	26.06	26.06
		ANP32E	HUMAN	Q9BTT0	Acidic leucine-rich nuclear phosphoprotein 32 family member E	Q9BTT0|Q9BTT0-3|P97822|P97822-2|Q9BTT0-2|Q5TB25	0	0	0	0	0	2	2	0	0	0	0	0	0	2	2	0	0	0	0	0	0	11300000	7550000	0	30920.2	16	19.27	19.27
		Apoa1	MOUSE	Q00623	Apolipoprotein A-I	Q00623	2	6	1	0	0	0	0	0	2	6	1	0	0	0	0	0	3670000	23900000	557000	0	0	0	0	0	30615	22.7	54.27	54.27
		Apoh	MOUSE	Q01339	Beta-2-glycoprotein 1	Q01339	0	0	0	0	1	2	3	1	0	0	0	0	1	2	3	1	0	0	0	0	1940000	6850000	6190000	2640000	39930.4	13.6	44.05	44.05
		APRT	HUMAN	P07741	Adenine phosphoribosyltransferase	P07741|P07741-2|H3BQZ9|P08030|H3BSW3	2	1	1	0	1	1	1	1	2	1	1	0	1	1	1	1	7180000	3580000	1820000	0	2280000	14700000	2240000	2630000	19778.6	15.5	25.41	25.41
		ARCN1	HUMAN	B0YIW6	Archain 1, isoform CRA_a	B0YIW6|P48444|P48444-2|Q5XJY5	1	2	0	0	0	0	0	0	1	2	0	0	0	0	0	0	1130000	3320000	0	0	0	0	0	0	62195.8	6.5	21.25	21.25
		ARF1	HUMAN	P84077	ADP-ribosylation factor 1	P84077|P61204|Q8BSL7|P84078|P61205|B7ZB63|F5H423|P84085|P84084|F8WDB3|E9Q2C2	1	2	1	0	1	1	1	0	1	3	1	0	1	2	2	0	1830000	14200000	605000	0	4030000	16300000	10800000	0	20753.5	30.3	48.81	26.29
		ARF4	HUMAN	P18085	ADP-ribosylation factor 4	P18085|C9JAK5|U3KQF2	1	1	1	0	1	1	1	1	1	1	1	0	1	1	1	1	4550000	9420000	2500000	0	4520000	25800000	13600000	4640000	20624.5	31.6	48.74	12.65
		Arf4	MOUSE	P61750	ADP-ribosylation factor 4	P61750|E9Q798	1	1	1	0	0	1	0	0	1	1	1	0	0	1	0	0	2210000	3130000	760000	0	0	5880000	0	0	20510.4	31.6	47.43	11.34
		ARHGDIA	HUMAN	J3QQX2	Rho GDP-dissociation inhibitor 1	J3QQX2|P52565|J3KRE2|P52565-2|J3KS60|Q99PT1	0	0	0	0	1	2	2	2	0	0	0	0	1	4	3	2	0	0	0	0	1160000	18500000	8680000	2030000	25945	20	29.57	29.57
		Arhgdib	MOUSE	Q61599	Rho GDP-dissociation inhibitor 2	Q61599	1	2	0	0	1	2	2	1	1	3	0	0	1	3	3	1	1060000	6390000	0	0	1750000	25900000	23300000	2390000	22907.5	18.5	27.3	27.3
		ATIC	HUMAN	P31939	Bifunctional purine biosynthesis protein PURH	P31939|P31939-2|F8WEF0|Q9CWJ9	0	3	0	0	0	3	3	0	0	3	0	0	0	4	3	0	0	1690000	0	0	0	5510000	4860000	0	65128.2	12.5	61.02	61.02
		ATP2A2	HUMAN	P16615	Sarcoplasmic/endoplasmic reticulum calcium ATPase 2	P16615|P16615-3|P16615-5|P16615-2|O55143|J3KMM5|O55143-2|P16615-4|Q8R429|Q93084-5|Q93084-6|Q93084|Q93084-7|Q93084-3|Q93084-2|Q93084-4|Q64518|E9Q559|Q64518-3|B1ATS5|Q64518-2|B1ATS4|O14983|O14983-2|O14983-3	0	4	0	0	2	3	5	3	0	4	0	0	2	3	5	3	0	8790000	0	0	2310000	15000000	26200000	7180000	116409	9	90.2	90.2
		ATP5A1	HUMAN	P25705	ATP synthase subunit alpha, mitochondrial	P25705|Q03265|P25705-2|D3Z6F5|P25705-3|K7ESA0|D6RJ16	3	7	1	0	2	7	7	5	3	7	1	0	2	7	7	5	7590000	23800000	2820000	0	6720000	88400000	64400000	22100000	59863.7	18	108.99	108.99
		ATP5B	HUMAN	P06576	ATP synthase subunit beta, mitochondrial	P06576|P56480	1	8	0	0	0	6	4	0	1	8	0	0	0	6	4	0	1330000	29000000	0	0	0	47500000	21200000	0	56558.9	20.6	111.4	111.4
		BZW1	HUMAN	Q7L1Q6-3	Isoform 3 of Basic leucine zipper and W2 domain-containing protein 1	Q7L1Q6-3|Q7L1Q6-4|Q7L1Q6|Q7L1Q6-2|Q9CQC6	1	3	1	0	0	0	0	0	1	3	1	0	0	0	0	0	780000	4940000	436000	0	0	0	0	0	51452.2	5.9	30.38	30.38
		C3	MOUSE	P01027	Complement C3	P01027|P01027-2|P01024	8	9	2	0	0	2	1	1	9	9	2	0	0	2	1	1	9930000	12500000	1380000	0	0	3460000	3240000	707000	188021	8.7	100.92	100.92
		C7orf55	HUMAN	Q96HJ9-2	Isoform 2 of UPF0562 protein C7orf55	Q96HJ9-2|Q9Y383|Q9Y383-2|Q9Y383-3|Q7TNC4|Q7TNC4-4|Q05CX5|Q7TNC4-3|Q7TNC4-2|E9PX54|E9Q715|Q9NQ29|Q9NQ29-3|Q9NQ29-2|A8MYV2|Q9CYI4|Q9CYI4-2	1	2	1	1	0	0	0	0	1	2	1	1	0	0	0	0	716000	4390000	1480000	1510000	0	0	0	0	54793.4	5.8	21.1	21.1
		CAD	HUMAN	P27708	CAD protein	P27708|F8VPD4|B2RQC6|G3UWN2|E9QAI5|B2RQC6-2|E9QAT6	1	2	1	1	0	1	4	2	1	2	1	1	0	2	4	2	1080000	2260000	894000	781000	0	3530000	5180000	1550000	245318	4.7	50.73	50.73
		CAMK2B	HUMAN	Q13554	Calcium/calmodulin-dependent protein kinase type II subunit beta	Q13554|Q13555-6|Q13555|Q13555-8|Q13555-2|Q13555-9|Q13554-2|E9PF82|Q13555-7|Q13555-4|Q13557-11|Q13555-5|Q13555-3|Q13557-4|Q13554-5|Q13554-8|Q13557-6|Q5SWX3|E9PBG7|Q13557-3|Q13554-3|Q13557|D6R938|Q13557-5|Q13555-10|Q13557-10|Q13557-9|Q13554-6|Q9UQM7-2|Q13554-4|Q13557-8|Q13557-12|Q9UQM7|Q13554-7|H7BXS4|Q5SVJ0|Q5SVI1|Q68EG2|P28652|E9Q1T1|Q923T9|Q5SVI2|Q923T9-2|Q5SVI3|Q5SVI0|E9Q1V9|Q6PHZ2-5|Q5SVJ1|Q6P…	0	0	0	0	1	1	1	1	0	0	0	0	1	1	1	1	0	0	0	0	1330000	4910000	3850000	1570000	73589.3	2.8	17.23	17.23
		CANX	HUMAN	P27824-2	Isoform 2 of Calnexin	P27824-2|P27824|P27824-3|D6RD16|P35564	1	6	0	0	0	4	4	0	1	7	0	0	0	5	4	0	919000	19000000	0	0	0	23900000	18100000	0	72015	20	107.65	107.65
		CAP1	HUMAN	Q01518	Adenylyl cyclase-associated protein 1	Q01518|Q01518-2|P40124	1	3	0	0	0	0	0	0	1	3	0	0	0	0	0	0	1570000	5730000	0	0	0	0	0	0	52357	7.3	18.57	18.57
		CAPZB	HUMAN	B1AK88	Capping protein (Actin filament) muscle Z-line, beta, isoform CRA_d	B1AK88|P47756|P47756-2|B1AK87|P47757-4|P47757|P47757-2|A2AMW0|B1AK85	2	1	1	0	0	0	0	0	2	1	1	0	0	0	0	0	1620000	2080000	794000	0	0	0	0	0	34180	10.6	23.91	23.91
		CBX3	HUMAN	Q13185	Chromobox protein homolog 3	Q13185|P23198|Q9DCC5|B8ZZ43|D3Z1A9	0	0	0	0	0	1	1	0	0	0	0	0	0	1	1	0	0	0	0	0	0	1490000	6910000	0	20982.2	14.2	17.2	17.2
		CCT2	HUMAN	P78371	T-complex protein 1 subunit beta	P78371|F5GWF6|F8VQ14|P78371-2|P80314	1	3	1	1	1	2	3	1	1	3	1	1	1	2	3	1	3310000	6210000	1900000	1730000	923000	9000000	7930000	1420000	57829.5	10.2	55.5	55.5
		CCT3	HUMAN	P49368	T-complex protein 1 subunit gamma	P49368|P49368-2|B4DUR8|P80318|Q3U0I3|E9Q133	1	2	1	1	0	3	4	0	1	2	1	1	0	3	4	0	1400000	6500000	493000	666000	0	9510000	8660000	0	61103.4	11	56.88	56.88
		CCT4	HUMAN	P50991	T-complex protein 1 subunit delta	P50991|P80315|P50991-2|G5E839|G3UYW5	2	4	1	0	1	2	2	1	2	4	1	0	1	2	2	1	6670000	15200000	3130000	0	4560000	21600000	15400000	7520000	58436.7	14.4	46.74	46.74
		CCT5	HUMAN	P48643	T-complex protein 1 subunit epsilon	P48643|E9PCA1|B7ZAR1|E7ENZ3|P48643-2|P80316	1	4	1	0	0	0	0	0	1	4	1	0	0	0	0	0	445000	5710000	971000	0	0	0	0	0	60126.4	9	37.49	37.49
		CCT6A	HUMAN	P40227	T-complex protein 1 subunit zeta	P40227|P40227-2|P80317|Q92526|Q92526-3|E9QPA6|Q61390|Q92526-2|B1AT05	1	4	0	0	2	3	2	2	1	4	0	0	2	3	2	2	715000	6530000	0	0	1940000	10900000	7410000	2310000	58479.6	9.6	49.88	49.88
		CCT7	HUMAN	Q99832	T-complex protein 1 subunit eta	Q99832|P80313|Q99832-3|Q99832-4|Q99832-2|F8WBP8	1	2	0	0	2	3	3	1	1	2	0	0	2	4	5	2	3530000	5420000	0	0	2470000	17800000	22200000	4040000	59879.1	12.3	59.16	59.16
		CCT8	HUMAN	P50990	T-complex protein 1 subunit theta	P50990|P50990-2|P50990-3|P42932|H3BL49	6	8	0	0	0	6	5	2	6	8	0	0	0	7	5	2	8010000	15800000	0	0	0	34100000	10800000	4660000	60190.1	22.4	95.97	95.97
		CDC42	HUMAN	P60953	Cell division control protein 42 homolog	P60953|P60766|P60953-1|P60766-1	2	2	2	1	0	1	3	1	3	2	2	1	0	2	4	1	9010000	6790000	3060000	2840000	0	1490000	27800000	1600000	21600.5	25.6	48.63	35.38
		Cfh	MOUSE	E9Q8I0	Complement factor H	E9Q8I0|P06909|D6RGQ0|E9Q8H9|Q4LDF6	0	3	0	0	0	10	22	6	0	3	0	0	0	12	28	7	0	8140000	0	0	0	59200000	199000000	23000000	145947	29.1	307.2	307.2
		CFL1	HUMAN	P23528	Cofilin-1	P23528|E9PK25|G3V1A4	0	1	0	0	1	1	1	1	0	2	0	0	1	2	2	1	0	4630000	0	0	1310000	11900000	8870000	1300000	18730.4	46.3	93.48	17.82
		Cfl1	MOUSE	P18760	Cofilin-1	P18760|F8WGL3|Q9Y281|Q9Y281-3|P45591	0	0	0	0	1	1	1	1	0	0	0	0	1	2	2	2	0	0	0	0	1290000	10200000	11700000	2650000	18787.4	46.3	94.22	18.56
		CLIC1	HUMAN	O00299	Chloride intracellular channel protein 1	O00299	0	2	0	0	2	3	3	3	0	2	0	0	2	3	4	4	0	5460000	0	0	6740000	21100000	25000000	12200000	27264.5	51.8	101.22	48.31
		Clic1	MOUSE	Q9Z1Q5	Chloride intracellular channel protein 1	Q9Z1Q5	1	2	1	1	0	1	3	0	1	2	1	1	0	1	3	0	6530000	9130000	4090000	676000	0	24900000	41700000	0	27354.6	42.7	82.73	34.7
		CLIC4	HUMAN	Q9Y696	Chloride intracellular channel protein 4	Q9Y696|Q9QYB1	0	0	0	0	0	1	1	0	0	0	0	0	0	1	1	0	0	0	0	0	0	5590000	3220000	0	28999.8	8.6	17.24	17.24
		CLNS1A	HUMAN	P54105	Methylosome subunit pICln	P54105|E9PJF4	0	0	0	0	0	1	0	0	0	0	0	0	0	1	0	0	0	0	0	0	0	4050000	0	0	26386	11.8	17.8	17.8
		CLTC	HUMAN	Q00610	Clathrin heavy chain 1	Q00610|Q00610-2|Q5SXR6|Q68FD5|P53675|P53675-2|J3KS13	3	6	2	0	1	2	3	0	3	8	2	0	1	3	4	0	3530000	11900000	1090000	0	945000	4620000	8110000	0	193380	5.9	77.06	77.06
		Clu	MOUSE	Q06890	Clusterin	Q06890	0	0	0	0	1	1	1	1	0	0	0	0	1	2	1	1	0	0	0	0	795000	7430000	4740000	1150000	52282.3	3.7	18.11	18.11
		Cndp2	MOUSE	Q9D1A2	Cytosolic non-specific dipeptidase	Q9D1A2|Q96KP4|Q96KP4-2	0	0	0	0	0	1	1	0	0	0	0	0	0	1	1	0	0	0	0	0	0	129000	486000	0	53222.8	7.3	20.62	20.62
		COPA	HUMAN	P53621-2	Isoform 2 of Coatomer subunit alpha	P53621-2|P53621|F8WHL2|Q8CIE6	1	2	1	0	1	4	1	0	1	2	1	0	1	4	1	0	658000	4370000	158000	0	1760000	12200000	3960000	0	140919	6.2	55.95	55.95
		COPB1	HUMAN	P53618	Coatomer subunit beta	P53618|Q9JIF7	0	6	0	0	1	4	2	1	0	6	0	0	1	5	2	1	0	7920000	0	0	402000	7460000	8740000	1380000	108281	14.3	80.74	80.74
		COPB2	HUMAN	P35606	Coatomer subunit beta'	P35606|P35606-2|O55029	0	3	0	0	0	0	0	0	0	3	0	0	0	0	0	0	0	3670000	0	0	0	0	0	0	103341	3.2	26.72	26.72
		COPG1	HUMAN	Q9Y678	Coatomer subunit gamma-1	Q9Y678|Q9QZE5|Q7TNQ1	2	6	0	0	0	2	3	0	2	6	0	0	0	2	3	0	1580000	13600000	0	0	0	9120000	3460000	0	99028.8	11.6	75.71	75.71
		Coro1a	MOUSE	O89053	Coronin-1A	O89053|P31146|G3UYK8|H3BRY3	3	4	2	0	0	6	5	0	3	4	2	0	0	6	6	0	2960000	8260000	2170000	0	0	47400000	72400000	0	51672.9	20.6	83.75	83.75
		Coro7	MOUSE	Q9D2V7	Coronin-7	Q9D2V7	0	0	0	0	0	1	1	0	0	0	0	0	0	1	1	0	0	0	0	0	0	2540000	2620000	0	101666	2.4	16.64	16.64
		CS	HUMAN	O75390	Citrate synthase, mitochondrial	O75390|B4DJV2|F8VWQ5|Q80X68|F8W0J2	0	2	0	1	0	1	2	0	0	2	0	1	0	1	2	0	0	4070000	0	393000	0	7650000	8880000	0	51939.7	9.6	45.23	31.87
		Cs	MOUSE	Q9CZU6	Citrate synthase, mitochondrial	Q9CZU6	0	1	0	0	0	0	0	0	0	1	0	0	0	0	0	0	0	411000	0	0	0	0	0	0	52021	5.3	18.56	5.2
		CSDE1	HUMAN	O75534-4	Isoform 4 of Cold shock domain-containing protein E1	O75534-4|O75534-3|O75534|O75534-2|E9PLT0|Q91W50	0	0	0	0	0	0	2	0	0	0	0	0	0	0	2	0	0	0	0	0	0	0	965000	0	94596.2	4.5	19.53	19.53
		CSE1L	HUMAN	P55060	Exportin-2	P55060|P55060-3|P55060-4|Q9ERK4|E9Q1T9|E9QAX7|P55060-2	4	5	4	1	1	3	6	2	4	5	4	1	1	3	6	2	7210000	21600000	6150000	386000	3200000	14900000	29100000	2750000	111213	11	118.83	118.83
		CTPS1	HUMAN	P17812	CTP synthase 1	P17812|P17812-2	0	0	0	0	0	0	1	0	0	0	0	0	0	0	1	0	0	0	0	0	0	0	754000	0	67373.8	3	17.65	17.65
		CYB5R3	HUMAN	P00387-3	Isoform 3 of NADH-cytochrome b5 reductase 3	P00387-3|P00387|P00387-2	0	2	0	0	0	1	1	0	0	2	0	0	0	1	1	0	0	2640000	0	0	0	5280000	3850000	0	38699.2	8.9	26.74	26.74
		Cyba	MOUSE	Q61462	Cytochrome b-245 light chain	Q61462|Q61462-2	0	0	0	0	0	1	1	0	0	0	0	0	0	1	1	0	0	0	0	0	0	5990000	6110000	0	20919	14.5	17.1	17.1
		DDX17	HUMAN	H3BLZ8	Probable ATP-dependent RNA helicase DDX17	H3BLZ8|Q92841|Q92841-3|Q92841-1|Q3U741|Q501J6|Q92841-2|Q501J6-2	1	2	1	1	1	2	2	1	1	2	1	1	1	2	2	1	2630000	5240000	1870000	482000	1780000	19700000	10200000	275000	81122.9	9.5	65.71	29.15
		DDX21	HUMAN	Q9NR30	Nucleolar RNA helicase 2	Q9NR30|Q9NR30-2|Q9JIK5|Q9BQ39	5	6	1	0	2	5	6	3	5	6	1	0	2	6	8	3	8700000	12200000	353000	0	2950000	35000000	41400000	3360000	87856.3	21.4	138.74	138.74
		DDX39A	HUMAN	O00148	ATP-dependent RNA helicase DDX39A	O00148|O00148-2|B1Q2N1|Q8VDW0|Q9Z1N5|D6RHT5|Q8VDW0-2	0	0	0	0	1	2	2	1	0	0	0	0	3	4	4	2	0	0	0	0	4920000	17200000	10600000	5150000	49642.1	14.9	42.34	23.5
		DDX39B	HUMAN	Q13838-2	Isoform 2 of Spliceosome RNA helicase DDX39B	Q13838-2|Q13838|Q5STU3	0	0	0	0	1	1	1	1	0	0	0	0	1	1	2	1	0	0	0	0	3660000	9830000	7650000	5260000	51134.9	14.6	34.04	15.2
		DDX3X	HUMAN	O00571	ATP-dependent RNA helicase DDX3X	O00571|Q62167|O00571-2|P16381|O15523|O15523-2|Q62095|O15523-3|B4DLA0|Q9NQI0|Q9NQI0-4|Q9NQI0-2|Q9NQI0-3|Q3V086|Q61496	1	6	2	1	0	2	2	0	1	6	2	1	0	2	3	0	4250000	14800000	3450000	4000000	0	3090000	38900000	0	73641.5	15.5	78.73	78.73
		DDX5	HUMAN	P17844	Probable ATP-dependent RNA helicase DDX5	P17844|J3KTA4|P17844-2|Q61656|Q8BTS0|S4R1I6	0	6	0	0	0	0	1	0	0	6	0	0	0	0	1	0	0	6970000	0	0	0	0	256000	0	69660.3	16.2	82.19	45.63
		DHX15	HUMAN	O43143	Putative pre-mRNA-splicing factor ATP-dependent RNA helicase DHX15	O43143|O35286	1	6	1	0	0	0	0	0	1	6	1	0	0	0	0	0	2810000	13700000	1830000	0	0	0	0	0	91730	8.1	52.39	52.39
		DHX9	HUMAN	Q08211	ATP-dependent RNA helicase A	Q08211|E9QNN1|O70133-2|O70133|O70133-3	1	4	1	0	1	2	3	1	1	4	1	0	1	2	3	1	1400000	8470000	508000	0	1280000	10600000	17700000	931000	142268	6.6	70.68	70.68
		DNM2	HUMAN	P50570	Dynamin-2	P50570|P50570-5|P50570-4|P50570-2|P50570-3|P39054|F8WIV5|G3X9G4|Q3TCR7|P39054-2|Q3T9X3|Q05193|Q05193-2|Q05193-4|Q05193-3|Q05193-5|P39053|P39053-4|P39053-6|P39053-2|P39053-5|P39053-3	0	3	0	0	0	1	1	0	0	3	0	0	0	1	1	0	0	3590000	0	0	0	6160000	4170000	0	98404.9	4	32.36	32.36
		DPYSL2	HUMAN	Q16555	Dihydropyrimidinase-related protein 2	Q16555|Q16555-2|O08553	0	0	0	0	0	1	1	0	0	0	0	0	0	1	1	0	0	0	0	0	0	1460000	2590000	0	62748.9	5.4	19.5	19.5
		DPYSL3	HUMAN	Q14195-2	Isoform LCRMP-4 of Dihydropyrimidinase-related protein 3	Q14195-2|E9PWE8|Q14195|Q62188|Q3TT92	1	2	1	0	0	0	0	0	1	2	1	0	0	0	0	0	1370000	2880000	694000	0	0	0	0	0	74366.4	2.7	18.97	18.97
		Dstn	MOUSE	Q9R0P5	Destrin	Q9R0P5|P60981|P60981-2|F6RFD5	0	0	0	0	0	2	3	0	0	0	0	0	0	2	3	0	0	0	0	0	0	6800000	18100000	0	18863.6	21.8	42	42
		DYNC1H1	HUMAN	Q14204	Cytoplasmic dynein 1 heavy chain 1	Q14204|Q9JHU4	8	25	3	2	7	11	13	9	8	25	3	2	7	11	13	9	8950000	42400000	1830000	1650000	13200000	40100000	41000000	11100000	535137	9.9	369.56	369.56
		ECHS1	HUMAN	P30084	Enoyl-CoA hydratase, mitochondrial	P30084	0	0	0	0	0	0	1	0	0	0	0	0	0	0	1	0	0	0	0	0	0	0	2710000	0	31843.3	6.2	17.84	17.84
		EDC4	HUMAN	Q6P2E9	Enhancer of mRNA-decapping protein 4	Q6P2E9|Q6P2E9-2|G5E896|Q3UJB9|Q3UJB9-2|D6RE33	0	0	0	0	0	1	2	0	0	0	0	0	0	1	2	0	0	0	0	0	0	285000	1720000	0	153085	6.8	21.06	21.06
		Eef1a1	MOUSE	P10126	Elongation factor 1-alpha 1	P10126	0	0	0	1	1	1	1	1	0	0	0	1	1	1	1	1	0	0	0	1460000	3190000	9020000	8060000	3500000	50455.3	35.2	206.52	20.22
		EEF1A1P5	HUMAN	Q5VTE0	Putative elongation factor 1-alpha-like 3	Q5VTE0|P68104|Q05639|P62631	0	0	0	1	2	3	3	3	0	0	0	2	2	12	7	4	0	0	0	11100000	12000000	46700000	40000000	17200000	50526.4	35.4	229.57	43.27
		EEF1D	HUMAN	P29692	Elongation factor 1-delta	P29692|E9PMW7|E9PRY8|P29692-2|P29692-3|E9PN91|P29692-4|E9PQZ1|E9PJD0|P57776|Q80T06|Q91VK2|P57776-2|D3YY68	0	4	0	0	0	0	0	0	0	4	0	0	0	0	0	0	0	5940000	0	0	0	0	0	0	31235.4	20.2	52.16	52.16
		EEF1G	HUMAN	P26641	Elongation factor 1-gamma	P26641|Q9D8N0|P26641-2	2	4	2	1	2	2	2	1	2	5	2	1	3	3	3	2	6510000	18200000	3970000	1750000	5190000	18500000	14000000	7270000	50460.2	16.7	65.27	65.27
		EEF2	HUMAN	P13639	Elongation factor 2	P13639	2	2	2	0	0	1	1	0	2	2	2	0	0	1	1	0	6900000	20800000	5250000	0	0	7470000	4610000	0	96306.4	28.5	212.84	24.38
		Eef2	MOUSE	P58252	Elongation factor 2	P58252	2	2	0	1	0	1	1	1	2	2	0	1	0	1	1	1	5460000	8570000	0	1820000	0	14700000	9890000	3970000	96282.3	28.5	205.65	26.61
		EFTUD2	HUMAN	Q15029	116 kDa U5 small nuclear ribonucleoprotein component	Q15029|Q15029-3|Q15029-2|A2AH85|O08810|G3UZ34	2	1	0	0	0	0	0	0	2	1	0	0	0	0	0	0	1620000	1390000	0	0	0	0	0	0	110404	3.6	25.09	12.78
		EHD4	HUMAN	Q9H223	EH domain-containing protein 4	Q9H223|Q9EQP2	0	5	0	0	0	1	2	0	0	5	0	0	0	1	2	0	0	5710000	0	0	0	5410000	3210000	0	61402.2	12	40.23	40.23
		EIF2S1	HUMAN	P05198	Eukaryotic translation initiation factor 2 subunit 1	P05198|Q6ZWX6	1	3	0	1	0	0	0	0	1	3	0	1	0	0	0	0	2890000	5900000	0	289000	0	0	0	0	36396.8	9.5	28.14	28.14
		EIF2S2	HUMAN	P20042	Eukaryotic translation initiation factor 2 subunit 2	P20042|Q99L45	0	0	0	0	0	2	2	0	0	0	0	0	0	2	2	0	0	0	0	0	0	2870000	1940000	0	38730.1	14.4	32.78	32.78
		EIF2S3	HUMAN	P41091	Eukaryotic translation initiation factor 2 subunit 3	P41091|Q9Z0N1|Q2VIR3|Q9Z0N2|A2AAW9|Q2VIR3-2|F8W810	0	0	0	0	0	3	3	0	0	0	0	0	0	3	3	0	0	0	0	0	0	18800000	17700000	0	51679.1	9.9	43.09	43.09
		EIF3A	HUMAN	Q14152	Eukaryotic translation initiation factor 3 subunit A	Q14152|Q14152-2|P23116	0	0	0	0	0	0	2	0	0	0	0	0	0	0	2	0	0	0	0	0	0	0	1830000	0	166966	2.2	18.11	18.11
		EIF3CL	HUMAN	B5ME19	Eukaryotic translation initiation factor 3 subunit C-like protein	B5ME19|Q99613|Q99613-2|Q8R1B4	0	0	0	0	0	1	1	1	0	0	0	0	0	1	1	1	0	0	0	0	0	4250000	1470000	1610000	106156	1.7	17.1	17.1
		EIF3F	HUMAN	O00303	Eukaryotic translation initiation factor 3 subunit F	O00303|Q9DCH4	0	3	0	0	0	0	0	0	0	3	0	0	0	0	0	0	0	3470000	0	0	0	0	0	0	37677.3	11.2	27.93	27.93
		EIF3M	HUMAN	Q7L2H7	Eukaryotic translation initiation factor 3 subunit M	Q7L2H7|E7ESM3|E9PRI2|Q99JX4	0	0	0	0	1	0	1	1	0	0	0	0	1	0	1	1	0	0	0	0	704000	0	1830000	951000	42958.6	4.8	15.43	15.43
		EIF4A1	HUMAN	P60842	Eukaryotic initiation factor 4A-I	P60842|P60843|P60842-2|J3KT12|Q14240-2|Q14240|E7EQG2|P10630-2|P10630|Q8BTU6|E9Q561|F8WE11|E9PBH4|J3QQP0|D6RJ11|D6RJ60	4	7	4	4	2	4	5	2	4	9	4	6	2	5	6	2	14200000	64400000	15400000	9890000	2570000	64000000	25300000	2490000	46381.4	30	127.08	114.92
		EIF4A3	HUMAN	P38919	Eukaryotic initiation factor 4A-III	P38919|Q91VC3|E9PV04	2	3	0	1	0	1	1	0	2	3	0	1	0	1	1	0	1910000	3570000	0	554000	0	1450000	2930000	0	47155.5	14.5	59.98	47.82
		EIF4G2	HUMAN	P78344	Eukaryotic translation initiation factor 4 gamma 2	P78344|P78344-2|H0Y3P2|Q62448|G3XA17|Q62448-2|F7CBP1	0	0	0	0	1	1	1	0	0	0	0	0	1	1	1	0	0	0	0	0	492000	3660000	3980000	0	102874	2.2	15.81	15.81
		EIF4H	HUMAN	Q15056	Eukaryotic translation initiation factor 4H	Q15056|Q15056-2|Q9WUK2|Q9WUK2-2	0	0	0	0	0	1	1	0	0	0	0	0	0	1	1	0	0	0	0	0	0	3200000	2780000	0	27441.6	5.2	15.06	15.06
		EIF5A	HUMAN	I3L504	Eukaryotic translation initiation factor 5A-1	I3L504|P63241|P63242|P63241-2|Q6IS14|Q9GZV4|C9J7B5|F8WCJ1|Q8BGY2|J3QPS8	3	2	1	0	1	3	3	1	3	3	1	0	2	5	5	2	7860000	24800000	3560000	0	6470000	59200000	53800000	7830000	20959.8	33.8	74.94	74.94
		EIF6	HUMAN	P56537	Eukaryotic translation initiation factor 6	P56537|P56537-2|O55135	0	0	0	0	1	2	1	1	0	0	0	0	2	3	2	1	0	0	0	0	3460000	10100000	8580000	2190000	27112.1	13.8	25.54	25.54
		ELAVL1	HUMAN	Q15717-2	Isoform 2 of ELAV-like protein 1	Q15717-2|Q15717|P70372|M0QZR9	2	3	0	0	0	1	2	0	2	4	0	0	0	1	2	0	2510000	7260000	0	0	0	9130000	7940000	0	39223.8	12.4	42.37	42.37
		ENO1	HUMAN	P06733	Alpha-enolase	P06733|P06733-2	0	2	0	0	0	0	0	0	0	2	0	0	0	0	0	0	0	5480000	0	0	0	0	0	0	47510.4	14.5	50.03	16.03
		Eno1	MOUSE	P17182	Alpha-enolase	P17182|Q6PHC1|P13929|P13929-2|P13929-3|P21550	0	1	0	0	0	0	1	0	0	1	0	0	0	0	1	0	0	1210000	0	0	0	0	2700000	0	47482.3	14.5	56.88	17.76
		EPRS	HUMAN	P07814	Bifunctional glutamate/proline--tRNA ligase	P07814|Q8CGC7	0	3	0	0	0	2	2	0	0	3	0	0	0	2	2	0	0	2730000	0	0	0	7860000	8650000	0	172185	4.8	39.27	39.27
		ERCC2	HUMAN	P18074	TFIIH basal transcription factor complex helicase XPD subunit	P18074|E7EVE9|P18074-2|O08811|E9Q6K1|D3Z700	0	0	0	0	0	1	1	0	0	0	0	0	0	1	1	0	0	0	0	0	0	269000	219000	0	87706.4	3.2	18.58	18.58
		ETFA	HUMAN	P13804	Electron transfer flavoprotein subunit alpha, mitochondrial	P13804|P13804-2|H0YK49|J3KN60|Q99LC5	0	0	0	0	0	2	4	0	0	0	0	0	0	2	4	0	0	0	0	0	0	1590000	5020000	0	35421.3	17.4	50.57	50.57
		EZR	HUMAN	P15311	Ezrin	P15311|E7EQR4	0	1	0	0	0	0	0	0	0	1	0	0	0	0	0	0	0	608000	0	0	0	0	0	0	69525.7	3	15.7	9.01
		FAM129B	HUMAN	Q96TA1	Niban-like protein 1	Q96TA1|Q96TA1-2|Q8R1F1	0	2	0	0	0	0	0	0	0	2	0	0	0	0	0	0	0	2400000	0	0	0	0	0	0	84649.8	2.8	16.65	16.65
		FASN	HUMAN	P49327	Fatty acid synthase	P49327|P19096	0	3	0	0	1	0	1	0	0	3	0	0	1	0	1	0	0	1580000	0	0	1060000	0	918000	0	276046	3.3	40.08	40.08
		Fbl	MOUSE	P35550	rRNA 2'-O-methyltransferase fibrillarin	P35550|P22087|R4GMW7|A6NHQ2|Q80WS3	1	1	1	0	1	2	2	3	1	1	1	0	1	2	2	3	6970000	1210000	4060000	0	7200000	22000000	11000000	13000000	34420.3	18.9	35.98	35.98
		FEN1	HUMAN	P39748	Flap endonuclease 1	P39748|P39748-2|Q91Z50|P39749	1	2	0	0	0	0	0	0	1	2	0	0	0	0	0	0	1040000	4820000	0	0	0	0	0	0	42934.5	5.7	19.77	19.77
		FERMT3	HUMAN	Q86UX7	Fermitin family homolog 3	Q86UX7|Q86UX7-2	0	2	0	1	1	2	3	2	0	2	0	1	1	2	4	2	0	1890000	0	246000	856000	7440000	11800000	2110000	76521.9	17.6	77.24	55.39
		Fermt3	MOUSE	Q8K1B8	Fermitin family homolog 3	Q8K1B8	0	1	0	0	0	1	2	0	0	1	0	0	0	1	2	0	0	1020000	0	0	0	3230000	13500000	0	76203.7	12.9	65.04	43.19
		Flii	MOUSE	Q9JJ28	Protein flightless-1 homolog	Q9JJ28	0	0	0	0	0	0	1	0	0	0	0	0	0	0	1	0	0	0	0	0	0	0	505000	0	146227	2.1	15.11	15.11
		FLNA	HUMAN	P21333	Filamin-A	P21333|P21333-2|Q5HY54|E9PHF0|Q8BTM8-2	3	9	2	0	4	6	2	4	3	9	2	0	5	7	3	6	9770000	23800000	2940000	0	22300000	79600000	23700000	25700000	283472	31.2	636.14	128.62
		Flna	MOUSE	Q8BTM8	Filamin-A	Q8BTM8|B7FAU9	5	5	3	2	2	5	7	2	5	5	3	2	2	5	7	2	16000000	23600000	7030000	4710000	7470000	47400000	54500000	9900000	284069	28.1	601.26	98.26
		FLNB	HUMAN	O75369-8	Isoform 8 of Filamin-B	O75369-8|O75369|O75369-9|O75369-2|O75369-3|O75369-6|O75369-4|O75369-5|Q80X90|O75369-7|E7EN95	0	2	0	0	0	2	1	0	0	2	0	0	0	2	1	0	0	1660000	0	0	0	1690000	869000	0	283798	3.6	54.19	25.75
		FLNC	HUMAN	Q14315	Filamin-C	Q14315|Q14315-2|D3Z576|Q8VHX6|D3YW87|Q8VHX6-2	1	6	1	0	0	5	8	2	1	6	1	0	0	5	8	2	508000	12400000	1070000	0	0	17900000	19800000	1280000	293584	10.5	208.58	175.14
		FSCN1	HUMAN	Q16658	Fascin	Q16658|Q61553	2	2	2	0	0	1	1	0	2	2	2	0	0	1	1	0	4040000	3510000	1380000	0	0	4480000	5220000	0	55156.6	6.8	32.87	32.87
		FTSJ3	HUMAN	Q8IY81	pre-rRNA processing protein FTSJ3	Q8IY81	0	0	0	0	0	2	2	0	0	0	0	0	0	2	2	0	0	0	0	0	0	8890000	3490000	0	96956.1	4.7	36.49	36.49
		FUBP3	HUMAN	Q96I24	Far upstream element-binding protein 3	Q96I24|Q96I24-2|Q3TIX6|A2AJ72	0	0	0	0	0	1	1	0	0	0	0	0	0	1	1	0	0	0	0	0	0	3160000	4160000	0	61981.6	4.8	18.02	18.02
		G3BP1	HUMAN	Q13283	Ras GTPase-activating protein-binding protein 1	Q13283|P97855	0	0	0	0	0	2	2	0	0	0	0	0	0	2	2	0	0	0	0	0	0	2000000	4770000	0	52220.4	9.6	24.96	24.96
		G6pdx	MOUSE	Q00612	Glucose-6-phosphate 1-dehydrogenase X	Q00612|P11413-2|P11413|P11413-3	1	1	2	1	0	3	2	0	1	1	2	1	0	3	2	0	2800000	3440000	4670000	5650000	0	15700000	19100000	0	59717.9	10.4	53.97	53.97
		GAPDH	HUMAN	P04406	Glyceraldehyde-3-phosphate dehydrogenase	P04406|P04406-2|E7EUT5	4	4	4	3	3	5	5	3	8	9	5	3	3	8	10	5	46600000	94700000	13200000	6040000	43300000	265000000	209000000	95100000	36223.7	23.8	80.62	80.62
		Gapdh	MOUSE	P16858	Glyceraldehyde-3-phosphate dehydrogenase	P16858|P10096|S4R1W1|D3YYI5|D3Z0Z9|V9GXA7|Q64467|S4R2G5	4	4	4	2	2	5	6	2	8	9	5	2	4	11	19	3	52800000	87800000	22800000	19700000	54300000	397000000	644000000	71100000	36094.6	28.2	91.37	91.37
		GART	HUMAN	P22102	Trifunctional purine biosynthetic protein adenosine-3	P22102|P22102-2|Q64737|Q64737-2|F8WD69	0	0	0	0	0	2	3	0	0	0	0	0	0	2	3	0	0	0	0	0	0	4270000	6190000	0	109020	6	41.86	41.86
		GCN1L1	HUMAN	Q92616	Translational activator GCN1	Q92616|E9PVA8|Q8BIX2	2	3	1	0	0	3	2	1	2	4	1	0	0	4	3	1	1290000	3770000	316000	0	0	6510000	3450000	1130000	295149	2.6	52.22	52.22
		GFPT1	HUMAN	Q06210	Glutamine--fructose-6-phosphate aminotransferase [isomerizing] 1	Q06210|Q06210-2|P47856|P47856-2	0	1	0	0	0	0	1	0	0	1	0	0	0	0	1	0	0	1220000	0	0	0	0	3670000	0	79603.8	9	56.44	27.85
		GFPT2	HUMAN	O94808	Glutamine--fructose-6-phosphate aminotransferase [isomerizing] 2	O94808|Q9Z2Z9	0	2	0	0	0	0	1	0	0	2	0	0	0	0	1	0	0	2260000	0	0	0	0	3310000	0	77728	9.5	58.91	30.32
		GLRX3	HUMAN	O76003	Glutaredoxin-3	O76003|Q9CQM9	0	0	0	0	2	2	2	2	0	0	0	0	2	2	2	2	0	0	0	0	2100000	5070000	2190000	614000	37716.6	11.9	22.9	22.9
		Gm20425	MOUSE	E9Q035	Protein Gm20425	E9Q035|Q921I1	0	0	0	0	0	1	2	0	0	0	0	0	0	1	2	0	0	0	0	0	0	1840000	2920000	0	109962	3.1	30.51	30.51
		Gmfg	MOUSE	Q9ERL7	Glia maturation factor gamma	Q9ERL7|D3YY16	0	0	0	0	0	2	2	1	0	0	0	0	0	2	2	1	0	0	0	0	0	4580000	7130000	1310000	16919.2	17.6	25.71	25.71
		GNAI2	HUMAN	P04899-4	Isoform sGi2 of Guanine nucleotide-binding protein G(i) subunit alpha-2	P04899-4|P04899|P08752|P04899-5|P04899-2|P04899-3|P04899-6|P63096|P09471-2|Q9DC51|B2RSH2|P18872-2|Q5JWF2|Q5JWF2-2|P38405-2|P63092-4|P63092|P38405|P63092-2|P63092-3|Q03113|Q14344|A8MTJ3|P19087|P09471|P11488|Q5JWD1|Q6R0H7|Q6R0H7-4|Q66L47|P63094|Q8CGK7|P63094-2|Z4YKV1|P27601|P27600|Q3V3I2|P50149|P18872|P20612|Q9D034|A2A610|P63096-2	1	2	0	0	1	1	2	1	1	2	0	0	1	1	2	1	1320000	4750000	0	0	2060000	11700000	12400000	2940000	42060.8	12.5	45.28	31.77
		GNAI3	HUMAN	P08754	Guanine nucleotide-binding protein G(k) subunit alpha	P08754	0	1	0	0	0	1	1	0	0	1	0	0	0	1	1	0	0	1560000	0	0	0	5270000	4130000	0	41102	9.8	26.83	13.32
		GNB1	HUMAN	P62873	Guanine nucleotide-binding protein G(I)/G(S)/G(T) subunit beta-1	P62873|P62873-2|P62874	0	0	0	0	0	1	1	1	0	0	0	0	0	1	1	1	0	0	0	0	0	2480000	2740000	297000	38175.1	8.5	28.96	15.37
		GNB2	HUMAN	P62879	Guanine nucleotide-binding protein G(I)/G(S)/G(T) subunit beta-2	P62879|E9QKR0|P62880|E7EP32|D3YZX3|Q9HAV0|P16520|E9PCP0|P16520-2|Q61011|P29387|P62879-2|E9PWM7	0	1	0	0	0	2	2	1	0	1	0	0	0	3	3	1	0	870000	0	0	0	19800000	18500000	1010000	38072.1	12	37.52	23.93
		GNB2L1	HUMAN	P63244	Guanine nucleotide-binding protein subunit beta-2-like 1	P63244|P68040|J3KPE3|D6RAC2|D6RHH4|D6RF23|E9PD14|D6RAU2|D6RHJ5|D6R909|D6RGK8	3	5	2	0	1	5	8	1	3	5	2	0	1	5	9	1	8180000	25100000	1310000	0	1260000	24300000	32100000	398000	35532.5	44.1	119.9	119.9
		GOLPH3	HUMAN	Q9H4A6	Golgi phosphoprotein 3	Q9H4A6|Q9CRA5	0	0	0	0	0	1	1	1	0	0	0	0	0	1	1	1	0	0	0	0	0	2310000	1090000	801000	34095.2	5	17.44	17.44
		Gpx1	MOUSE	P11352	Glutathione peroxidase 1	P11352	0	0	0	0	0	0	1	0	0	0	0	0	0	0	1	0	0	0	0	0	0	0	2090000	0	22543.4	8.9	15.53	15.53
		GRHPR	HUMAN	U3KQ56	Glyoxylate reductase/hydroxypyruvate reductase	U3KQ56|Q9UBQ7	0	0	0	0	0	1	1	0	0	0	0	0	0	1	1	0	0	0	0	0	0	621000	1830000	0	39265.4	4.7	15.55	15.55
		GSDMD	HUMAN	G3V1A6	Gasdermin domain containing 1, isoform CRA_d	G3V1A6|P57764	0	2	0	0	0	0	0	0	0	2	0	0	0	0	0	0	0	3710000	0	0	0	0	0	0	58304.1	5	19.11	19.11
		GSTP1	HUMAN	P09211	Glutathione S-transferase P	P09211|A8MX94	0	0	0	0	0	3	2	2	0	0	0	0	0	4	3	2	0	0	0	0	0	8400000	7370000	502000	23583.6	22.8	43.53	43.53
		H2AFZ	HUMAN	P0C0S5	Histone H2A.Z	P0C0S5|Q71UI9|C9J0D1|Q71UI9-2|P0C0S6|Q3THW5|Q3UA95|Q71UI9-4|Q71UI9-3|C9J386|Q8R029	0	1	0	0	0	0	0	0	0	1	0	0	0	0	0	0	0	2050000	0	0	0	0	0	0	13552.5	20.3	27.73	8.17
		HADHA	HUMAN	P40939	Trifunctional enzyme subunit alpha, mitochondrial	P40939|P40939-2	0	0	0	0	0	2	2	0	0	0	0	0	0	2	3	0	0	0	0	0	0	5770000	1800000	0	83739.9	6.5	26.31	26.31
		Hadha	MOUSE	Q8BMS1	Trifunctional enzyme subunit alpha, mitochondrial	Q8BMS1	0	0	0	0	0	1	1	0	0	0	0	0	0	1	1	0	0	0	0	0	0	396000	1910000	0	83353	3.8	15.06	15.06
		Hba	MOUSE	P01942	Hemoglobin subunit alpha	P01942|Q91VB8|P69905|G3V1N2|P01966	4	4	4	1	3	5	5	3	6	8	7	3	3	6	8	4	29600000	75300000	20300000	9230000	15000000	107000000	141000000	12800000	15141.9	61.9	79.71	79.71
		Hbb-b1	MOUSE	P02088	Hemoglobin subunit beta-1	P02088|P02070|P02100|P69891|P69892|P02042|P68871|E9PFT6|E9PBW4|P02104	1	2	0	0	2	2	0	2	4	4	0	0	3	2	0	8	67200000	44500000	0	0	66100000	152000000	0	201000000	15954	70.7	123.85	29.2
		Hbb-b2	MOUSE	P02089	Hemoglobin subunit beta-2	P02089	3	4	1	1	2	4	1	3	5	5	1	1	2	5	3	5	50000000	67500000	12400000	2590000	43900000	142000000	83300000	89300000	15992.1	66.6	96.51	60.03
		Hbbt1	MOUSE	A8DUK4	Beta-globin	A8DUK4	2	3	2	2	1	2	3	0	7	5	8	4	2	5	11	0	82000000	75500000	116000000	65500000	56300000	208000000	750000000	0	15804.8	70.7	121	42.55
		HDLBP	HUMAN	Q00341	Vigilin	Q00341|Q8VDJ3|Q00341-2	2	4	1	0	0	1	2	1	2	4	1	0	0	1	2	1	1090000	4200000	546000	0	0	1310000	2150000	154000	142081	6.1	66	66
		HEATR2	HUMAN	Q86Y56	HEAT repeat-containing protein 2	Q86Y56|Q86Y56-2	0	0	0	0	0	1	0	1	0	0	0	0	0	1	0	1	0	0	0	0	0	2360000	0	1470000	94831.7	3.2	20.48	20.48
		Hist1h1a	MOUSE	P43275	Histone H1.1	P43275	1	2	1	0	0	0	0	0	1	2	1	0	0	0	0	0	218000	3090000	114000	0	0	0	0	0	21784.7	16.9	27.82	16.23
		HIST1H1B	HUMAN	P16401	Histone H1.5	P16401	1	1	0	1	0	1	1	1	1	1	0	1	0	1	1	1	2290000	5620000	0	2890000	0	13300000	3580000	7990000	22579.8	17.2	37.94	14.94
		Hist1h1b	MOUSE	P43276	Histone H1.5	P43276	1	1	1	0	0	0	0	0	1	1	1	0	0	0	0	0	1010000	2450000	1440000	0	0	0	0	0	22575.7	17.4	31.02	8.02
		Hist1h1c	MOUSE	P15864	Histone H1.2	P15864	0	1	0	0	0	0	0	0	0	1	0	0	0	0	0	0	0	3700000	0	0	0	0	0	0	21266.3	22.6	48.37	5.64
		Hist1h1d	MOUSE	P43277	Histone H1.3	P43277	1	1	1	0	0	0	1	0	1	1	1	0	0	0	1	0	2770000	5160000	2440000	0	0	0	8150000	0	22099.1	21.7	52.06	9.33
		HIST1H1E	HUMAN	P10412	Histone H1.4	P10412|P16403|P16402|P22492|Q02539|I7HFT9|Q07133	0	0	0	0	0	0	0	0	0	0	0	0	0	0	0	0	0	0	0	0	0	0	0	0	21864.9	21.9	52.78	0
		Hist1h1e	MOUSE	P43274	Histone H1.4	P43274	1	1	0	0	1	1	1	1	1	1	0	0	1	1	1	1	345000	3240000	0	0	3750000	18000000	12100000	6710000	21976.9	21.9	50.88	15.57
		HIST1H2AB	HUMAN	P04908	Histone H2A type 1-B/E	P04908|Q7L7L0|P20671|Q93077|Q6FI13|P0C0S8|Q9BTM1|Q16777|Q99878|Q96KK5|Q8CGP5|Q8CGP7|P22752|Q8BFU2|Q6GSS7|Q8CGP4|Q8R1M2|Q64523|Q8CGP6|F8WIX8|Q9BTM1-2|P16104|Q96QV6|P27661|Q8IUE6|Q71UI9-5|Q64522|G3UWL7	1	1	1	1	1	1	1	1	2	2	3	2	2	8	5	3	10900000	28800000	18000000	55200000	14200000	75200000	45200000	19700000	14135.2	26.9	37.42	17.86
		HIST1H2BN	HUMAN	U3KQK0	Histone H2B	U3KQK0|Q5QNW6-2|Q99879|Q99880|P57053|P58876|Q99877|Q5QNW6|P62807|Q93079|O60814|Q8CGP2-2|Q8CBB6|Q8CGP2|Q64475|P10853|P10854|Q64478|Q64525|Q8CGP1|Q6ZWY9|P33778|Q16778|P23527|P06899|Q8N257|Q9D2U9|Q64524|Q8CGP0|Q96A08|P70696|G3X9D5	2	3	2	3	1	3	1	1	9	14	13	20	2	8	5	2	118000000	371000000	113000000	163000000	23900000	752000000	107000000	36000000	18803.6	30.7	45.73	45.73
		HIST1H4A	HUMAN	P62805	Histone H4	P62805|P62806	6	6	5	7	6	6	6	6	19	28	20	54	15	18	19	16	363000000	851000000	201000000	769000000	477000000	1230000000	961000000	581000000	11367.1	51.4	92.69	92.69
		HIST2H3PS2	HUMAN	Q5TEC6	Histone H3	Q5TEC6|Q16695|P68431|Q71DI3|P84243|P68433|P84228|P84244|P02301|F8WI35|Q6NXT2|B4DEB1|K7EMV3|K7EP01	1	4	2	1	1	2	1	1	2	6	3	3	1	3	2	1	14300000	98400000	16300000	18700000	3420000	56000000	24700000	6400000	15486.9	25	45.58	45.58
		HLA-A	HUMAN	P13746-2	Isoform 2 of HLA class I histocompatibility antigen, A-11 alpha chain	P13746-2|Q5SRN5|P13746|P04439|P05534|Q5SRN7|P18462|P30457|P30450|P30453|P10314|P30456|P16189|P10316|P01892|P01891|P16188|P16190|P30459|P30512|P30447|P30455|P30443|P01893|Q09160|A2BF26|A2AEA2|Q95604|P30501|Q29963|Q9TNN7|P30508|Q07000|Q29960|P30505|P10321|Q31612|Q29960-2	2	3	0	0	1	1	1	0	2	3	0	0	1	1	1	0	2940000	6050000	0	0	6370000	21500000	12900000	0	41748.9	12.3	33.61	33.61
		HNRNPA1	HUMAN	P09651	Heterogeneous nuclear ribonucleoprotein A1	P09651|P09651-2|F8W6I7|P09651-3|Q5EBP8|P49312|P49312-2|Q32P51	1	4	1	0	0	0	0	0	1	5	1	0	0	0	0	0	569000	12000000	477000	0	0	0	0	0	38860.1	13.7	51.46	51.46
		HNRNPA2B1	HUMAN	P22626	Heterogeneous nuclear ribonucleoproteins A2/B1	P22626|O88569|P22626-2|O88569-2|O88569-3	1	4	0	0	0	2	2	0	1	4	0	0	0	2	2	0	1600000	10400000	0	0	0	28600000	18300000	0	37486.1	16.4	53.61	53.61
		HNRNPA3	HUMAN	P51991	Heterogeneous nuclear ribonucleoprotein A3	P51991|Q8BG05|A2AL12|V9GX38	1	1	0	0	0	0	0	0	1	2	0	0	0	0	0	0	208000	825000	0	0	0	0	0	0	39822.5	10	34.18	15.27
		HNRNPA3	HUMAN	P51991-2	Isoform 2 of Heterogeneous nuclear ribonucleoprotein A3	P51991-2|J3QNY1|Q8BG05-2|B2RXM2|E9Q7H5	0	1	0	0	0	0	1	0	0	1	0	0	0	0	1	0	0	3470000	0	0	0	0	838000	0	37256.6	9.8	31.23	12.32
		HNRNPAB	HUMAN	Q99729-2	Isoform 2 of Heterogeneous nuclear ribonucleoprotein A/B	Q99729-2|D6RBZ0|Q99729-3|D6RD18|D6R9P3|Q20BD0|Q80XR6|Q99020	0	0	0	0	0	0	1	0	0	0	0	0	0	0	1	0	0	0	0	0	0	0	1040000	0	36081	7.2	19.14	9.65
		HNRNPC	HUMAN	P07910	Heterogeneous nuclear ribonucleoproteins C1/C2	P07910|G3V2Q1|P07910-2|G3V4C1|B4DY08|G3V576|P07910-4|Q9Z204|Q9Z204-5|Q9Z204-2|Q9Z204-3|Q9Z204-4|O60812|P07910-3|B4DSU6|A2BDX3	1	5	1	1	0	3	2	0	2	6	1	1	0	3	2	0	11100000	21500000	3310000	3630000	0	34900000	3470000	0	33726.5	17.9	64.68	64.68
		HNRNPD	HUMAN	Q14103	Heterogeneous nuclear ribonucleoprotein D0	Q14103|Q14103-2|Q14103-3|Q14103-4|Q60668|Q60668-2|G3X9W0|Q60668-3|Q60668-4|G5E8G0	0	0	0	0	0	1	1	0	0	0	0	0	0	1	1	0	0	0	0	0	0	12700000	9360000	0	38604.6	6.7	23.9	14.41
		HNRNPDL	HUMAN	O14979	Heterogeneous nuclear ribonucleoprotein D-like	O14979|O14979-2|O14979-3|Q9Z130|Q99729|Q99729-4	1	1	0	0	0	1	0	0	1	1	0	0	0	1	0	0	1760000	3580000	0	0	0	5490000	0	0	46607.8	6.1	27.02	17.53
		HNRNPF	HUMAN	P52597	Heterogeneous nuclear ribonucleoprotein F	P52597|Q9Z2X1|Q9Z2X1-2	2	4	1	0	2	3	3	0	2	6	1	0	2	3	3	0	6380000	19000000	1350000	0	1830000	11100000	7130000	0	46013.4	19	67.09	51.35
		HNRNPH1	HUMAN	G8JLB6	Heterogeneous nuclear ribonucleoprotein H	G8JLB6|P31943|E9PCY7|Q8C2Q7|O35737|D6RIH9|P70333|D6R9D3|P55795|J3QPH6	1	4	1	1	1	4	5	1	1	5	1	1	1	4	5	1	2410000	15300000	1840000	7140000	1010000	17300000	30900000	1620000	51514.2	24.3	99.59	83.85
		HNRNPH3	HUMAN	P31942	Heterogeneous nuclear ribonucleoprotein H3	P31942|P31942-2|P31942-3|D3Z3N4|D3YWT1|P31942-4|P31942-5|P31942-6	1	2	1	0	0	2	2	0	1	2	1	0	0	3	2	0	2160000	6530000	1490000	0	0	7690000	7130000	0	36982.9	10.9	35.84	35.84
		HNRNPK	HUMAN	P61978-2	Isoform 2 of Heterogeneous nuclear ribonucleoprotein K	P61978-2|P61978|P61979-2|P61979|P61978-3|Q5T6W5|B2M1R6|P61979-3|D3YWG1|H3BLL4|D3Z5X4|Q5T6W1|Q8BT23|S4R457|H3BJ43	3	4	4	1	3	6	6	3	4	4	4	1	5	9	9	5	14900000	21000000	8070000	5580000	10600000	92700000	83200000	12500000	51312.6	38.1	108.51	108.51
		HNRNPL	HUMAN	P14866	Heterogeneous nuclear ribonucleoprotein L	P14866|P14866-2|Q8R081|G3UY38|B4DVF8	3	2	0	1	0	2	2	0	3	2	0	1	0	2	2	0	11300000	8320000	0	6760000	0	10400000	13700000	0	64759.2	15.2	42.06	42.06
		HNRNPM	HUMAN	P52272	Heterogeneous nuclear ribonucleoprotein M	P52272|P52272-2|M0R0Y6	2	2	1	1	1	2	2	2	2	4	1	2	1	3	2	2	12700000	33800000	2420000	10000000	3310000	16900000	11800000	6320000	77799.7	18.6	126.12	40.02
		Hnrnpm	MOUSE	Q9D0E1	Heterogeneous nuclear ribonucleoprotein M	Q9D0E1|Q9D0E1-2|B8JK32|B8JK33	1	1	1	1	0	2	1	1	1	1	1	1	0	2	1	1	3820000	3930000	1020000	1830000	0	3480000	2790000	1790000	77989.9	17.4	106.62	20.52
		HNRNPR	HUMAN	O43390-2	Isoform 2 of Heterogeneous nuclear ribonucleoprotein R	O43390-2|O43390|Q8VHM5|O43390-4|F7B5B5|O43390-3|B4DT28|V9GWW3	0	4	0	1	0	3	1	0	0	4	0	1	0	3	1	0	0	4380000	0	1280000	0	8230000	570000	0	71498.4	13.9	70.14	70.14
		HNRNPU	HUMAN	Q00839	Heterogeneous nuclear ribonucleoprotein U	Q00839|Q00839-2	0	1	0	0	0	1	3	1	0	1	0	0	0	1	4	1	0	615000	0	0	0	1050000	12000000	166000	91324.5	19.6	122.52	40.13
		Hnrnpu	MOUSE	Q8VEK3	Heterogeneous nuclear ribonucleoprotein U	Q8VEK3|G3XA10	1	1	1	1	1	2	2	1	1	2	2	1	1	2	2	1	9390000	12400000	8740000	3250000	3820000	17300000	11500000	4760000	88714.9	12.6	96.41	26.07
		HNRNPUL1	HUMAN	Q9BUJ2	Heterogeneous nuclear ribonucleoprotein U-like protein 1	Q9BUJ2|Q9BUJ2-2|B7Z4B8|Q9BUJ2-4|Q9BUJ2-3|Q8VDM6|Q8VDM6-2	0	0	0	0	0	2	1	0	0	0	0	0	0	2	1	0	0	0	0	0	0	11800000	7480000	0	96307.3	3.6	20.31	20.31
		HNRNPUL2	HUMAN	Q1KMD3	Heterogeneous nuclear ribonucleoprotein U-like protein 2	Q1KMD3|H3BQZ7|Q00PI9	0	0	0	0	1	1	1	1	0	0	0	0	1	1	1	1	0	0	0	0	67000000	6640000	5280000	1980000	85673.7	3.8	18.04	18.04
		HSD17B10	HUMAN	Q99714	3-hydroxyacyl-CoA dehydrogenase type-2	Q99714|Q99714-2|Q5H928|A2AFQ2|Q99N15	1	3	0	0	0	1	2	0	1	3	0	0	0	1	2	0	989000	3920000	0	0	0	1750000	5280000	0	27150.8	26	48.77	48.77
		HSP90AA1	HUMAN	P07900-2	Isoform 2 of Heat shock protein HSP 90-alpha	P07900-2|P07900|P07901|Q14568	2	6	2	1	1	1	3	1	3	7	2	1	1	1	3	1	9520000	37600000	7200000	548000	4760000	22400000	25900000	5590000	98729.9	22.5	234.15	88.37
		HSP90AB1	HUMAN	P08238	Heat shock protein HSP 90-beta	P08238|P11499|Q58FF7|Q58FF6|Q58FF8|E9PX27|Q58FG0|Q58FG1	4	7	4	3	4	6	7	5	4	9	5	4	6	10	10	8	14100000	104000000	10600000	5600000	36900000	197000000	135000000	54000000	83605	43.7	325.99	165.02
		HSP90B1	HUMAN	P14625	Endoplasmin	P14625|P08113	3	7	3	0	2	2	3	1	3	7	3	0	2	2	3	1	8450000	24800000	2920000	0	2840000	15200000	15300000	2060000	92752.5	15	103.16	87.97
		HSPA1A	HUMAN	P08107	Heat shock 70 kDa protein 1A/1B	P08107|P08107-2|V9GZ37|P48741	2	6	1	0	2	7	4	2	2	6	1	0	2	9	7	2	9550000	22900000	2700000	0	7970000	90900000	39500000	11000000	70336.2	33.5	178.45	100.43
		HSPA5	HUMAN	P11021	78 kDa glucose-regulated protein	P11021|P20029	7	9	2	0	0	9	7	1	8	10	2	0	0	10	7	1	14300000	45700000	790000	0	0	82900000	35700000	3750000	72445.7	27.5	168.58	138.83
		HSPA6	HUMAN	P17066	Heat shock 70 kDa protein 6	P17066	0	0	0	0	1	0	1	0	0	0	0	0	1	0	1	0	0	0	0	0	626000	0	1620000	0	71483.3	16	96.61	5.7
		HSPA8	HUMAN	P11142	Heat shock cognate 71 kDa protein	P11142|P63017|E9PKE3|Q504P4|P11142-2|E9PNE6|A8K7Q2|P54652|P17156|D3YW43	10	13	8	7	11	14	14	13	14	22	12	9	13	19	23	18	88200000	200000000	40900000	30800000	66500000	526000000	472000000	136000000	71125	42.2	324.95	256.58
		HSPA9	HUMAN	P38646	Stress-70 protein, mitochondrial	P38646|P38647	8	13	8	1	5	9	11	5	8	14	9	1	6	15	18	7	13700000	47500000	15500000	2280000	10800000	94200000	121000000	18300000	73964.5	34.3	200.76	200.76
		HSPB1	HUMAN	P04792	Heat shock protein beta-1	P04792|F8WE04|C9J3N8|D3YZ06	3	5	4	3	5	7	6	5	3	8	4	3	9	15	12	9	17800000	44900000	10700000	13400000	65600000	291000000	230000000	80000000	22839.1	50.2	120.66	109.27
		Hspb1	MOUSE	P14602	Heat shock protein beta-1	P14602|P14602-2|P14602-3	0	0	0	0	1	1	1	0	0	0	0	0	1	1	1	0	0	0	0	0	1020000	4140000	470000	0	23070.5	19.1	28.53	17.14
		HSPD1	HUMAN	P10809	60 kDa heat shock protein, mitochondrial	P10809|P63038|P63038-2|P10809-2	4	8	2	0	0	1	1	0	4	8	2	0	0	2	1	0	5910000	31000000	1440000	0	0	17900000	11900000	0	61224.7	15.7	94	94
		IDH3G	HUMAN	P51553	Isocitrate dehydrogenase [NAD] subunit gamma, mitochondrial	P51553|P51553-2|E7EQB8|G5E9Q7|P70404	0	0	0	0	0	0	1	0	0	0	0	0	0	0	1	0	0	0	0	0	0	0	1490000	0	43192.9	5.8	19.01	19.01
		IFI16	HUMAN	Q16666	Gamma-interferon-inducible protein 16	Q16666|Q16666-6|Q16666-2|Q16666-3	1	3	0	0	0	0	0	0	1	3	0	0	0	0	0	0	1250000	1490000	0	0	0	0	0	0	88710.4	6.6	28.57	28.57
		IFIT1	HUMAN	P09914	Interferon-induced protein with tetratricopeptide repeats 1	P09914|P09914-2|Q5T764	3	5	0	0	0	0	0	0	3	5	0	0	0	0	0	0	4570000	11300000	0	0	0	0	0	0	55815.8	12.9	36.37	36.37
		IFIT3	HUMAN	O14879	Interferon-induced protein with tetratricopeptide repeats 3	O14879	2	4	0	0	3	2	1	1	2	7	0	0	4	2	1	1	1360000	19400000	0	0	6220000	5630000	2700000	854000	56725.5	16.1	66.64	66.64
		IGF2BP3	HUMAN	O00425	Insulin-like growth factor 2 mRNA-binding protein 3	O00425|O00425-2	0	0	0	0	0	1	1	0	0	0	0	0	0	1	1	0	0	0	0	0	0	1820000	1550000	0	64046.2	2.9	19.69	19.69
		Ighg1	MOUSE	A0A075B5P4	Ig gamma-1 chain C region secreted form	A0A075B5P4|P01869|P01868	0	0	0	0	1	0	4	3	0	0	0	0	1	0	11	4	0	0	0	0	1570000	0	88200000	15500000	36316.6	20.3	59.49	59.49
		Ighg2b	MOUSE	A0A075B5P3	Protein Ighg2b	A0A075B5P3|P01867|P01867-2	0	0	0	0	0	1	1	1	0	0	0	0	0	1	1	1	0	0	0	0	0	4600000	4230000	3220000	37308.6	13	27.54	16.5
		Ighg2c	MOUSE	F6TQW2	Protein Ighg2c	F6TQW2|P01865|P01864|P01863	0	0	0	0	0	3	1	1	0	0	0	0	0	4	2	2	0	0	0	0	0	29500000	6430000	835000	44779.4	19.3	42.27	31.23
		Ighm	MOUSE	P01872-2	Isoform 2 of Ig mu chain C region	P01872-2|A0A075B6A0|A0A075B5P6|P01872	0	2	3	0	1	1	5	1	0	2	3	0	1	1	6	1	0	3310000	3120000	0	2220000	9280000	38600000	3580000	53153.5	17.6	66.85	66.85
		ILK	HUMAN	Q13418	Integrin-linked protein kinase	Q13418|Q13418-2|Q13418-3|O55222	0	0	0	0	0	0	1	0	0	0	0	0	0	0	1	0	0	0	0	0	0	0	331000	0	51931.8	3	16.4	16.4
		IMMT	HUMAN	Q16891	MICOS complex subunit MIC60	Q16891|Q16891-4|Q16891-2|Q16891-3|B9A067|C9J406	0	0	0	0	0	0	1	1	0	0	0	0	0	0	1	1	0	0	0	0	0	0	62800	1150000	84075.8	5.5	19.96	19.96
		IMPDH2	HUMAN	P12268	Inosine-5'-monophosphate dehydrogenase 2	P12268|P24547	0	3	0	0	0	3	2	0	0	3	0	0	0	3	2	0	0	5820000	0	0	0	9750000	4830000	0	56260.4	12.4	50.18	50.18
		IPO7	HUMAN	O95373	Importin-7	O95373|Q9EPL8|E9PLJ0	1	3	1	1	1	3	2	4	2	4	1	1	1	3	2	4	2440000	5330000	983000	1410000	767000	8850000	7010000	4900000	120827	6.1	54.43	54.43
		IQGAP1	HUMAN	P46940	Ras GTPase-activating-like protein IQGAP1	P46940|H0YLE8	1	1	1	0	0	2	1	0	1	1	1	0	0	2	1	0	2850000	5250000	2150000	0	0	10900000	6060000	0	189876	9.8	130.49	26.22
		Iqgap1	MOUSE	Q9JKF1	Ras GTPase-activating-like protein IQGAP1	Q9JKF1|Q13576|F5H7S7|Q13576-3|Q13576-2|Q3UQ44|Q86VI3|F2Z2E2|F8VQ29	2	3	2	0	0	2	4	0	2	3	2	0	0	2	5	0	1500000	4330000	1380000	0	0	2570000	20200000	0	189538	14.3	180.68	64.3
		ISG15	HUMAN	P05161	Ubiquitin-like protein ISG15	P05161	1	3	0	0	0	0	0	0	1	4	0	0	0	0	0	0	372000	13400000	0	0	0	0	0	0	17944.2	19.3	36.78	36.78
		Itgb2	MOUSE	P11835	Integrin beta-2	P11835|Q542I8|M0QWA7	0	2	0	0	0	2	3	1	0	2	0	0	0	2	3	1	0	2190000	0	0	0	5700000	7950000	285000	88219.4	8.4	48.77	48.77
		KHDRBS1	HUMAN	Q07666	KH domain-containing, RNA-binding, signal transduction-associated protein 1	Q07666|Q07666-2|Q60749|O75525|O75525-2|Q07666-3|Q5VWX1|Q9WU01|Q9R226|Q9WU01-2	0	2	0	0	0	1	2	0	0	2	0	0	0	1	2	0	0	7850000	0	0	0	13000000	12400000	0	48340.6	13.3	25.78	25.78
		KHSRP	HUMAN	Q92945	Far upstream element-binding protein 2	Q92945|Q3U0V1	1	2	1	0	0	0	0	0	1	2	1	0	0	0	0	0	1910000	5270000	982000	0	0	0	0	0	73399.3	3.3	16.43	16.43
		KIF5B	HUMAN	P33176	Kinesin-1 heavy chain	P33176|Q61768	0	4	0	0	0	0	0	0	0	4	0	0	0	0	0	0	0	2810000	0	0	0	0	0	0	110425	5.2	29.72	29.72
		KPNA2	HUMAN	P52292	Importin subunit alpha-1	P52292|P52293	0	2	1	0	1	2	2	0	0	2	1	0	1	3	4	0	0	2670000	538000	0	669000	4100000	6570000	0	58203.2	12.8	34.59	34.59
		KPNB1	HUMAN	Q14974	Importin subunit beta-1	Q14974|P70168|Q14974-2	2	6	2	2	2	3	6	1	2	8	3	2	2	3	7	1	5970000	17400000	3460000	3100000	1640000	6480000	12500000	732000	98480.7	14.9	117.21	117.21
		KRT1	HUMAN	P04264	Keratin, type II cytoskeletal 1	P04264|Q5XQN5|Q922U2|Q9Z331|Q8BGZ7|Q3UV11|P50446|Q3UV17|E9Q0F0|Q7Z794|Q6IFZ6|Q6NXH9|Q9R0H5|Q6IFZ9	2	2	2	2	0	0	0	0	2	2	2	2	0	0	0	0	2670000	2820000	2720000	4940000	0	0	0	0	66208.7	10	63.44	43.82
		Krt1	MOUSE	P04104	Keratin, type II cytoskeletal 1	P04104	0	0	0	1	0	0	0	0	0	0	0	1	0	0	0	0	0	0	0	452000	0	0	0	0	66118.3	3.7	17.1	5.01
		KRT10	HUMAN	P13645	Keratin, type I cytoskeletal 10	P13645|P02535|P02535-2|A2A513|P02535-3	1	0	2	0	0	0	0	0	1	0	2	0	0	0	0	0	1860000	0	3010000	0	0	0	0	0	59054.3	3.2	15.68	15.68
		KRT14	HUMAN	P02533	Keratin, type I cytoskeletal 14	P02533|Q04695|Q9QWL7|F5GWP8|Q61781	0	0	1	1	0	0	0	0	0	0	1	1	0	0	0	0	0	0	1170000	2070000	0	0	0	0	51902.9	4.2	15.89	15.89
		Krt18	MOUSE	P05784	Keratin, type I cytoskeletal 18	P05784|P05783|F8VZY9	0	1	1	0	0	0	0	0	0	1	1	0	0	0	0	0	0	624000	1170000	0	0	0	0	0	47537.3	4.4	15.8	15.8
		KRT2	HUMAN	P35908	Keratin, type II cytoskeletal 2 epidermal	P35908|P13647|P04259|P02538|P48668|O95678|Q5XKE5|Q8VED5	0	0	0	1	0	0	0	0	0	0	0	1	0	0	0	0	0	0	0	1210000	0	0	0	0	65717	5	26.05	6.43
		Krt8	MOUSE	P11679	Keratin, type II cytoskeletal 8	P11679	2	2	2	2	0	2	2	1	3	4	3	3	0	2	2	1	22300000	53200000	18500000	15800000	0	56000000	53800000	2090000	54564.4	6.5	26.7	26.7
		KRT9	HUMAN	P35527	Keratin, type I cytoskeletal 9	P35527	0	0	3	0	0	0	0	0	0	0	3	0	0	0	0	0	0	0	2270000	0	0	0	0	0	62291.5	5.7	24.74	24.74
		LAP3	HUMAN	P28838	Cytosol aminopeptidase	P28838|P28838-2|Q9CPY7|Q9CPY7-2	0	0	0	0	0	1	3	0	0	0	0	0	0	1	3	0	0	0	0	0	0	6340000	5980000	0	56564.7	9.8	27.77	27.77
		LARS	HUMAN	Q9P2J5	Leucine--tRNA ligase, cytoplasmic	Q9P2J5|B4DER1|B4DJ10|Q8BMJ2	0	0	0	0	0	2	1	0	0	0	0	0	0	3	1	0	0	0	0	0	0	8190000	2970000	0	135662	4.7	31.45	31.45
		LASP1	HUMAN	Q14847	LIM and SH3 domain protein 1	Q14847|Q61792|Q14847-2|F6S2S5|Q14847-3	1	2	1	1	0	1	2	1	1	3	1	1	0	1	3	1	2120000	1900000	1160000	1210000	0	4860000	8200000	2280000	30116	22.6	44.19	44.19
		Lbr	MOUSE	Q3U9G9	Lamin-B receptor	Q3U9G9	2	3	1	0	1	2	2	1	2	3	1	0	1	2	2	1	3120000	7730000	1220000	0	3040000	20200000	22100000	3780000	72009.4	6	36.83	36.83
		Lcp1	MOUSE	Q61233	Plastin-2	Q61233|P13796|P13796-2|P13797|P13797-2|F8W8D8|P13797-3|B1AX58|Q99K51	3	4	2	0	0	0	0	0	3	4	2	0	0	0	0	0	3690000	9470000	2430000	0	0	0	0	0	70775.6	7.1	39.74	39.74
		LDHA	HUMAN	P00338-3	Isoform 3 of L-lactate dehydrogenase A chain	P00338-3|P00338|P00338-2|P00338-5|P00338-4|Q6ZMR3|P07864|F5H245|G3XAP5|F5H155|F5H5G7|G5E8N5|P16125|P06151|P00342|D3Z736|F5H6W8|F5H5J4|F5GXU1|F5GXC7|F5GWW2|F5H8H6	2	5	0	0	0	0	0	0	2	5	0	0	0	0	0	0	8090000	13500000	0	0	0	0	0	0	40121.8	16	57.02	44.37
		LDHB	HUMAN	P07195	L-lactate dehydrogenase B chain	P07195	0	1	0	0	0	0	0	0	0	1	0	0	0	0	0	0	0	625000	0	0	0	0	0	0	36923.1	8.3	21.56	8.91
		LMNA	HUMAN	P02545	Prelamin-A/C	P02545|P02545-6|P02545-2|P02545-4|P02545-5|Q5TCI8|P48678|P48678-2|P48678-3|P02545-3	5	9	2	1	1	2	1	0	5	10	2	1	1	2	1	0	11900000	30500000	2400000	1790000	1200000	16900000	2610000	0	74423.5	15	100.34	100.34
		LMNB1	HUMAN	P20700	Lamin-B1	P20700|E9PBF6	0	1	0	0	0	0	0	0	0	1	0	0	0	0	0	0	0	1000000	0	0	0	0	0	0	66692.5	8.7	38.47	6.43
		Lmnb1	MOUSE	P14733	Lamin-B1	P14733	0	0	0	0	0	0	2	0	0	0	0	0	0	0	2	0	0	0	0	0	0	0	1120000	0	67012.7	13.7	51.22	19.18
		LRPPRC	HUMAN	P42704	Leucine-rich PPR motif-containing protein, mitochondrial	P42704|B8ZZ38	1	4	1	1	0	2	3	1	2	4	1	2	0	2	3	1	60200000	21200000	515000	73800000	0	147000000	546000000	569000000	159100	6.8	49.55	49.55
		LRRC59	HUMAN	Q96AG4	Leucine-rich repeat-containing protein 59	Q96AG4|Q922Q8|I3L223	2	2	2	0	0	3	2	0	2	2	2	0	0	4	2	0	5430000	4630000	2260000	0	0	11600000	5760000	0	35329.2	17.2	42.57	42.57
		LSM5	HUMAN	Q9Y4Y9	U6 snRNA-associated Sm-like protein LSm5	Q9Y4Y9|B8ZZF8|P62322	0	0	0	0	1	1	1	1	0	0	0	0	1	2	2	2	0	0	0	0	291000	1820000	1510000	787000	9994.4	20.8	17.25	17.25
		Lta4h	MOUSE	P24527	Leukotriene A-4 hydrolase	P24527|P09960|P09960-4|P09960-2|P09960-3	0	0	0	0	0	0	3	0	0	0	0	0	0	0	3	0	0	0	0	0	0	0	19100000	0	69677.2	6.5	35.95	35.95
		Ltf	MOUSE	P08071	Lactotransferrin	P08071	1	4	2	0	0	8	3	0	1	4	2	0	0	11	3	0	2330000	8750000	1770000	0	0	60900000	7910000	0	79719.1	19	102.17	102.17
		Lyz2	MOUSE	P08905	Lysozyme C-2	P08905	0	0	0	0	0	1	1	0	0	0	0	0	0	1	1	0	0	0	0	0	0	3270000	367000	0	17145.1	27	21.4	21.4
		Mapre1	MOUSE	Q61166	Microtubule-associated protein RP/EB family member 1	Q61166|Q15691	0	0	0	0	0	2	1	0	0	0	0	0	0	2	1	0	0	0	0	0	0	2780000	1440000	0	30186.8	19.4	15.29	15.29
		MARS	HUMAN	P56192	Methionine--tRNA ligase, cytoplasmic	P56192|P56192-2	0	0	0	0	0	2	3	0	0	0	0	0	0	2	3	0	0	0	0	0	0	7040000	7290000	0	102312	5.7	36.04	36.04
		MAT2A	HUMAN	P31153	S-adenosylmethionine synthase isoform type-2	P31153|Q3THS6	0	0	0	0	0	1	1	0	0	0	0	0	0	1	1	0	0	0	0	0	0	4900000	5470000	0	44002.2	5.3	18.82	18.82
		MATR3	HUMAN	A8MXP9	Matrin-3	A8MXP9|P43243|D6REM6|Q8K310|P43243-2|B3KM87	1	1	1	0	0	4	3	0	1	1	1	0	0	4	3	0	2660000	4820000	967000	0	0	12500000	6420000	0	100479	7	48.21	48.21
		Mboat7	MOUSE	Q8CHK3	Lysophospholipid acyltransferase 7	Q8CHK3|D3YU33	0	0	0	0	0	0	1	0	0	0	0	0	0	0	1	0	0	0	0	0	0	0	1920000	0	54119.4	6.1	15.32	15.32
		MCM2	HUMAN	P49736	DNA replication licensing factor MCM2	P49736|P97310	2	3	1	0	1	4	3	1	2	3	1	0	1	5	3	1	3130000	6690000	1420000	0	2640000	25000000	10100000	2950000	102579	11.2	69.77	69.77
		MCM3	HUMAN	P25205	DNA replication licensing factor MCM3	P25205|P25206|B4DWW4|J3KQ69	1	4	1	0	1	3	5	1	1	4	1	0	1	3	5	1	4720000	8700000	2580000	0	1360000	7570000	9410000	1440000	91606.8	11.6	78.69	78.69
		MCM4	HUMAN	P33991	DNA replication licensing factor MCM4	P33991|P49717	1	3	0	0	1	3	3	2	1	3	0	0	1	3	3	2	1230000	5630000	0	0	1520000	10500000	9050000	2600000	97126.8	9.3	60.38	60.38
		MCM5	HUMAN	P33992	DNA replication licensing factor MCM5	P33992|B1AHB1|Q52KC3|P49718	0	3	0	0	1	1	2	0	0	3	0	0	1	1	2	0	0	5570000	0	0	929000	4940000	2750000	0	83082.8	8.7	47.41	47.41
		MCM6	HUMAN	Q14566	DNA replication licensing factor MCM6	Q14566|P97311	0	5	0	0	0	2	2	0	0	5	0	0	0	2	2	0	0	8100000	0	0	0	6770000	6050000	0	93857.5	10.4	77.25	77.25
		MCM7	HUMAN	P33993	DNA replication licensing factor MCM7	P33993|P33993-3|P33993-2|Q61881	2	2	0	0	0	0	0	0	2	2	0	0	0	0	0	0	1100000	3260000	0	0	0	0	0	0	81934.1	3.6	20.78	20.78
		Mcpt4	MOUSE	Q3UN88	Mast cell protease 4	Q3UN88|P21812	2	1	0	0	0	0	0	0	2	1	0	0	0	0	0	0	3900000	3420000	0	0	0	0	0	0	27538.5	9.7	16.24	16.24
		MDH2	HUMAN	P40926	Malate dehydrogenase, mitochondrial	P40926|P40926-2|P08249	0	0	0	0	0	0	2	0	0	0	0	0	0	0	2	0	0	0	0	0	0	0	5480000	0	35959.1	7.6	21.15	21.15
		Mpo	MOUSE	P11247	Myeloperoxidase	P11247|P05164-3|P05164|P05164-2	6	12	5	2	2	9	11	3	7	15	6	3	2	13	15	3	9740000	55000000	5600000	3470000	7440000	169000000	196000000	17900000	82093.1	29.9	181.6	181.6
		MRPS17	HUMAN	I3L0E3	28S ribosomal protein S17, mitochondrial	I3L0E3|Q9Y2R5	0	0	0	0	0	0	1	0	0	0	0	0	0	0	1	0	0	0	0	0	0	0	3440000	0	25891.2	12.8	18.23	18.23
		MSN	HUMAN	P26038	Moesin	P26038|P26041|P26043|P35241-5|P35241|P35241-4|P26040|Q7TSG6	0	6	0	0	0	0	0	0	0	6	0	0	0	0	0	0	0	10400000	0	0	0	0	0	0	67933	9.3	52.5	45.81
		MTHFD1	HUMAN	F5H2F4	C-1-tetrahydrofolate synthase, cytoplasmic	F5H2F4|P11586|Q922D8	3	5	3	0	0	1	2	1	3	5	3	0	0	1	2	1	4550000	12700000	2110000	0	0	3160000	11600000	3520000	111410	9.3	78.65	78.65
		MX2	HUMAN	P20592	Interferon-induced GTP-binding protein Mx2	P20592	1	1	0	0	0	0	0	0	1	1	0	0	0	0	0	0	589000	2780000	0	0	0	0	0	0	82543.6	3.6	20.88	20.88
		Myh4	MOUSE	Q5SX39	Myosin-4	Q5SX39|Q9Y623|P13542|Q5SX40|Q9UKX2|P12882|G3UW82|P13535|P13533|P12883|Q02566|Q91Z83|P13541|P11055|Q9UKX3|B1AR69|A2AQP0	0	12	0	0	0	0	0	0	0	12	0	0	0	0	0	0	0	18900000	0	0	0	0	0	0	223768	7.8	95.09	95.09
		MYH9	HUMAN	P35579	Myosin-9	P35579|P35579-2|Q5BKV1	2	5	1	0	0	0	0	0	2	6	1	0	0	0	0	0	5730000	19400000	973000	0	0	0	0	0	227784	28.1	512.58	63.3
		Myh9	MOUSE	Q8VDD5	Myosin-9	Q8VDD5|P35749-2|P35749|P35749-3|P35749-4|E9QPE7|O08638|O08638-2|F2Z494|P35580-4|P35580-3|P35580-2|F8W6L6|P35580-5|P35580|Q3UH59|Q5SV64|Q61879|G8JLL9|Q7Z406-2|F2Z2U8|Q7Z406-6|Q7Z406|Q7Z406-4|Q7Z406-5|Q6URW6-3|Q6URW6|K3W4R2|Q6URW6-2	4	6	1	0	1	1	0	0	4	7	1	0	1	1	0	0	5290000	9050000	923000	0	901000	1710000	0	0	227566	30.3	522.8	73.52
		MYO1C	HUMAN	O00159	Unconventional myosin-Ic	O00159|O00159-3|F5H6E2|O00159-2	0	0	0	0	1	1	1	1	0	0	0	0	1	1	1	1	0	0	0	0	963000	2460000	3570000	1940000	122535	4.5	42.99	14.95
		Myo1c	MOUSE	Q9WTI7	Unconventional myosin-Ic	Q9WTI7|Q9WTI7-3|Q9WTI7-2|Q9WTI7-4	0	0	0	0	0	1	1	0	0	0	0	0	0	1	1	0	0	0	0	0	0	1110000	1200000	0	122798	4.4	44.27	16.23
		NAP1L1	HUMAN	P55209	Nucleosome assembly protein 1-like 1	P55209|F5H4R6|F8W0J6|P55209-2|B7Z9C2|F8VV59|B3KV44	0	0	0	0	0	2	1	0	0	0	0	0	0	2	1	0	0	0	0	0	0	4680000	2760000	0	45658.6	12.2	22.51	22.51
		Ncf1	MOUSE	F8WH69	Neutrophil cytosol factor 1	F8WH69|S4R293|Q09014	0	0	0	0	1	1	0	1	0	0	0	0	1	1	0	1	0	0	0	0	667000	2680000	0	15100000	46185.6	13.6	15.91	15.91
		Ncf2	MOUSE	O70145	Neutrophil cytosol factor 2	O70145	0	0	0	0	0	0	2	0	0	0	0	0	0	0	2	0	0	0	0	0	0	0	13100000	0	59940.7	7.4	25.06	25.06
		Ncf4	MOUSE	P97369	Neutrophil cytosol factor 4	P97369	0	0	0	0	2	1	2	2	0	0	0	0	2	1	3	2	0	0	0	0	1760000	2370000	7880000	2230000	38877.8	11.5	37.01	37.01
		NCL	HUMAN	P19338	Nucleolin	P19338	1	3	2	0	0	0	0	0	1	3	2	0	0	0	0	0	1740000	15900000	1650000	0	0	0	0	0	76670.1	10.7	79.5	26.25
		Ncl	MOUSE	P09405	Nucleolin	P09405	1	2	1	2	0	0	0	0	1	2	1	2	0	0	0	0	4710000	7490000	1910000	1630000	0	0	0	0	76778.7	9.6	65.35	23.76
		ngl	ELIMR	P21163	Peptide-N(4)-(N-acetyl-beta-D-glucosaminyl)asparagine amidase F	P21163	13	15	13	12	10	9	10	7	23	36	22	31	18	17	17	12	342000000	907000000	276000000	317000000	203000000	318000000	228000000	124000000	39430.7	47.1	204.11	204.11
		Ngp	MOUSE	O08692	Myeloid bactenecin (F1)	O08692	0	2	1	0	1	2	2	0	0	2	1	0	1	3	3	0	0	4380000	138000	0	858000	41600000	19200000	0	19673.7	29.9	40.88	40.88
		NHP2L1	HUMAN	B1AHD1	NHP2-like protein 1	B1AHD1|P55769|Q9D0T1|E9PZS4	0	0	0	0	0	2	2	1	0	0	0	0	0	3	2	1	0	0	0	0	0	15100000	8500000	1400000	14855.1	18.1	29.69	29.69
		NME1	HUMAN	P15531-2	Isoform 2 of Nucleoside diphosphate kinase A	P15531-2|P15531|E9PZF0|Q01768|Q32Q12|P22392-2|J3KPD9|P22392|O60361|E7ERL0|F6XY72|P15532	0	2	0	0	0	0	0	0	0	3	0	0	0	0	0	0	0	2280000	0	0	0	0	0	0	19881.5	17.5	20.15	20.15
		NOLC1	HUMAN	Q14978-2	Isoform Beta of Nucleolar and coiled-body phosphoprotein 1	Q14978-2|Q14978-3|Q14978	0	2	1	1	0	0	0	0	0	2	1	1	0	0	0	0	0	1370000	255000	790000	0	0	0	0	74745.2	3.5	17.03	17.03
		NONO	HUMAN	Q15233	Non-POU domain-containing octamer-binding protein	Q15233|Q99K48|Q15233-2|Q99K48-2	1	3	0	0	0	4	2	0	1	3	0	0	0	4	2	0	564000	5800000	0	0	0	7980000	5130000	0	54344.7	25.2	65.35	65.35
		NOP56	HUMAN	O00567	Nucleolar protein 56	O00567|Q9D6Z1|E0CXZ0	1	3	0	0	1	1	1	1	1	3	0	0	1	1	1	1	1160000	5740000	0	0	150000	1090000	3960000	326000	66448.1	8.4	44.42	44.42
		NOP58	HUMAN	Q9Y2X3	Nucleolar protein 58	Q9Y2X3|Q6DFW4	3	4	0	0	1	2	1	1	3	4	0	0	1	2	1	1	4440000	5600000	0	0	1470000	7800000	4550000	2070000	60090.6	11.1	53.91	53.91
		NPM1	HUMAN	P06748	Nucleophosmin	P06748|P06748-2|P06748-3|Q61937|Q5SQB5|Q5SQB0|Q9DAY9|E9Q5T3	3	6	3	4	3	4	5	3	4	10	4	4	4	6	8	4	30900000	128000000	14100000	15400000	15200000	133000000	104000000	9300000	32745.6	47.2	116.37	116.37
		NPM3	HUMAN	O75607	Nucleoplasmin-3	O75607	1	1	1	1	1	1	1	1	1	1	1	1	1	1	1	1	4730000	6700000	3000000	4700000	1290000	3480000	3270000	1430000	19628.6	8.9	21.89	21.89
		NSUN2	HUMAN	Q08J23	tRNA (cytosine(34)-C(5))-methyltransferase	Q08J23|Q08J23-2|Q08J23-3|Q1HFZ0|H3BKN0|Q1HFZ0-2	0	0	0	0	2	1	1	1	0	0	0	0	2	1	1	1	0	0	0	0	24200000	2780000	2110000	404000	87267.9	3.5	23.89	23.89
		NUDC	HUMAN	Q9Y266	Nuclear migration protein nudC	Q9Y266|O35685	1	2	1	1	0	0	0	0	1	2	1	1	0	0	0	0	2570000	5000000	1010000	1120000	0	0	0	0	38299.3	6.9	22.42	22.42
		NUP62	HUMAN	P37198	Nuclear pore glycoprotein p62	P37198|M0QXN5	0	0	0	0	0	0	1	0	0	0	0	0	0	0	1	0	0	0	0	0	0	0	1330000	0	53425.1	4.5	19.5	19.5
		NUP93	HUMAN	H3BVG0	Nuclear pore complex protein Nup93	H3BVG0|Q8N1F7|Q8BJ71	0	0	0	0	1	1	1	1	0	0	0	0	1	1	1	1	0	0	0	0	850000	2130000	1710000	966000	100352	1.9	16.08	16.08
		OSTF1	HUMAN	Q92882	Osteoclast-stimulating factor 1	Q92882|Q62422	0	0	0	0	1	1	1	1	0	0	0	0	1	1	1	1	0	0	0	0	1140000	5670000	7240000	1180000	23957.5	11.6	17.1	17.1
		P4HB	HUMAN	P07237	Protein disulfide-isomerase	P07237|P09103|H7BZ94|F5H8J2	1	2	1	0	0	0	0	0	1	2	1	0	0	0	0	0	1080000	2650000	185000	0	0	0	0	0	57514.7	5.1	22.94	22.94
		PA2G4	HUMAN	Q9UQ80	Proliferation-associated protein 2G4	Q9UQ80|P50580|F8VR77	4	4	0	0	2	5	3	1	4	4	0	0	2	5	4	2	7440000	15800000	0	0	3170000	36400000	27700000	3330000	44128.4	19.7	72.34	72.34
		PABPC1	HUMAN	P11940	Polyadenylate-binding protein 1	P11940|E7EQV3|P11940-2|P29341|E7ERJ7|Q9D4E6|Q62029|Q9H361|Q4VXU2|Q4VY17|Q96DU9|Q96DU9-2|Q8C7D3|A2A5N3	3	5	1	0	0	2	1	0	3	5	1	0	0	2	1	0	4410000	14600000	671000	0	0	10600000	6430000	0	70897.8	9.2	60.21	44.27
		PABPC4	HUMAN	Q13310-3	Isoform 3 of Polyadenylate-binding protein 4	Q13310-3|Q13310|Q13310-2|B1ANR0|Q6PHQ9|A3KFU8|A3KFU5|Q91YZ8|D3Z5M2	0	1	0	0	0	0	0	0	0	1	0	0	0	0	0	0	0	1700000	0	0	0	0	0	0	72731.7	3.4	25.65	9.71
		Padi4	MOUSE	Q9Z183	Protein-arginine deiminase type-4	Q9Z183	0	0	0	0	0	0	1	0	0	0	0	0	0	0	1	0	0	0	0	0	0	0	1570000	0	75098.5	4.3	21.97	21.97
		PARP1	HUMAN	P09874	Poly [ADP-ribose] polymerase 1	P09874|P11103|Q921K2|P11103-2	0	3	0	0	0	2	2	1	0	3	0	0	0	2	2	1	0	5930000	0	0	0	8510000	7420000	1260000	113880	4.6	39.41	39.41
		PCBP1	HUMAN	Q15365	Poly(rC)-binding protein 1	Q15365|P60335	2	2	1	0	3	5	6	3	3	2	1	0	3	6	8	3	7250000	10700000	2110000	0	23700000	73200000	82700000	23700000	38010.7	42.4	128.69	91.6
		PCBP2	HUMAN	Q15366-2	Isoform 2 of Poly(rC)-binding protein 2	Q15366-2|Q15366|Q15366-3|Q15366-6|Q61990|Q61990-3|Q15366-5|Q15366-4|B4DXP5|F8VZX2|Q15366-7|Q61990-2|P57721|P57721-4|E9PFP8|P57721-5|P57721-3|P57721-2|P57722|P57722-2|E9Q7D8	2	4	1	2	4	4	5	4	2	4	1	3	4	5	6	4	8540000	23200000	4280000	7710000	23400000	64800000	64500000	26200000	39049.9	31.6	116.22	79.13
		PCNA	HUMAN	P12004	Proliferating cell nuclear antigen	P12004|P17918	1	2	1	0	2	4	5	2	1	2	1	0	2	6	6	3	3600000	3900000	1250000	0	4070000	22600000	16600000	6410000	29110.6	34	52.9	52.9
		PDCD11	HUMAN	Q14690	Protein RRP5 homolog	Q14690	0	0	0	0	0	1	2	0	0	0	0	0	0	1	2	0	0	0	0	0	0	4570000	4560000	0	210066	1.9	20.23	20.23
		PDCD6IP	HUMAN	Q8WUM4-2	Isoform 2 of Programmed cell death 6-interacting protein	Q8WUM4-2|Q8WUM4|Q9WU78-3|Q9WU78|Q9WU78-2	0	0	0	0	0	1	2	0	0	0	0	0	0	1	2	0	0	0	0	0	0	1450000	1290000	0	97397.8	4.9	17.5	17.5
		PDE6H	HUMAN	G3V1V0	Myosin, light polypeptide 6, alkali, smooth muscle and non-muscle, isoform CRA_c	G3V1V0|P60660-2|P60660|F8W1R7|Q60605-2|Q60605|B7Z6Z4|G8JLA2|J3KND3|G3V1Y7|F8W180|F8VZU9|P14649|F8W1I5|Q8CI43|P08590|P05976|P05976-2|P09542|P05977|E9PWG4|P05977-2	0	3	0	0	0	2	1	0	0	3	0	0	0	2	1	0	0	13800000	0	0	0	25000000	8850000	0	18322.2	31	29.35	29.35
		PDIA3	HUMAN	P30101	Protein disulfide-isomerase A3	P30101	2	1	1	0	0	0	0	0	2	1	1	0	0	0	0	0	3380000	2710000	810000	0	0	0	0	0	57180.7	10.4	29.16	15.06
		Pdia3	MOUSE	P27773	Protein disulfide-isomerase A3	P27773	1	1	0	0	0	0	0	0	1	1	0	0	0	0	0	0	8070000	4710000	0	0	0	0	0	0	57133.7	7.7	22.28	8.18
		PDIA4	HUMAN	P13667	Protein disulfide-isomerase A4	P13667|P08003	3	12	3	1	0	0	0	0	3	12	3	1	0	0	0	0	7710000	26300000	3580000	3130000	0	0	0	0	73273.4	23.5	118.74	109.71
		Pdia6	MOUSE	Q922R8	Protein disulfide-isomerase A6	Q922R8|Q15084-2|Q15084-5|Q15084-4|Q15084|Q15084-3|Q3TML0	1	2	0	0	0	0	0	0	1	2	0	0	0	0	0	0	868000	2110000	0	0	0	0	0	0	48498.9	7.2	19.03	19.03
		PFKP	HUMAN	Q01813	ATP-dependent 6-phosphofructokinase, platelet type	Q01813|Q01813-2|Q8C605|Q9WUA3|Q9WUA3-2|B1APP8|P17858|P12382	0	3	0	0	0	1	1	0	0	4	0	0	0	1	1	0	0	5040000	0	0	0	1690000	2510000	0	86507.4	8.5	49.6	49.6
		PFN1	HUMAN	P07737	Profilin-1	P07737|K7EJ44	2	4	1	1	4	5	5	4	2	6	1	1	4	6	7	4	13000000	18700000	6040000	4570000	21200000	81500000	69300000	32600000	15225.1	74.2	103.97	74.21
		Pfn1	MOUSE	P62962	Profilin-1	P62962|Q5SX49|J3QMC2	1	3	0	1	3	4	4	4	1	4	0	1	4	5	5	4	1060000	7560000	0	5060000	7540000	28800000	40500000	6630000	15128.1	76.4	105.15	75.39
		PGK1	HUMAN	P00558	Phosphoglycerate kinase 1	P00558|P00558-2	0	0	0	0	0	0	1	0	0	0	0	0	0	0	1	0	0	0	0	0	0	0	371000	0	45013.3	8.6	24.01	10.69
		Pgk1	MOUSE	P09411	Phosphoglycerate kinase 1	P09411|S4R2M7	0	0	0	0	0	0	1	0	0	0	0	0	0	0	1	0	0	0	0	0	0	0	89200	0	44949.1	10.5	18.42	5.1
		PKM	HUMAN	P14618	Pyruvate kinase PKM	P14618|P14618-3|P14618-2|H3BQ34|Q504U3|P30613|P30613-2|P53657|G3X925|E9Q509|H3BQZ3	0	1	0	1	3	3	6	2	0	1	0	1	4	4	7	3	0	253000	0	997000	16400000	26400000	73200000	17900000	58506.4	40.1	250.36	92.41
		Pkm	MOUSE	P52480	Pyruvate kinase PKM	P52480|P52480-2	2	1	2	0	1	3	4	1	2	1	2	0	2	4	6	2	2300000	2320000	1650000	0	2760000	18700000	44800000	6170000	58414.4	37.2	216.09	58.14
		PLEC	HUMAN	Q15149	Plectin	Q15149|Q15149-2|Q15149-3|Q15149-6|Q15149-5|Q15149-4|Q15149-9|Q15149-8|Q15149-7|A0A075B730|Q8R0W0	6	17	2	2	3	5	7	1	6	18	2	2	4	6	7	2	12900000	27300000	2380000	1120000	9380000	15700000	24700000	4350000	533778	16.3	564.35	230.01
		Plec	MOUSE	Q9QXS1	Plectin	Q9QXS1|Q9QXS1-2|Q9QXS1-8|Q9QXS1-7|Q9QXS1-6|Q9QXS1-14|Q9QXS1-4|Q9QXS1-16|Q9QXS1-5|Q9QXS1-3|Q9QXS1-13|Q9QXS1-11|Q9QXS1-12|Q9QXS1-9|Q9QXS1-10|Q9QXS1-15|E9Q3W4	0	1	0	0	0	1	1	0	0	1	0	0	0	1	1	0	0	1420000	0	0	0	1640000	1440000	0	536118	8.3	350.31	15.97
		PLIN3	HUMAN	O60664	Perilipin-3	O60664|O60664-3|O60664-4	1	3	1	1	0	0	0	0	3	3	2	2	0	0	0	0	99600000	43400000	42700000	121000000	0	0	0	0	47245.3	8.7	19.69	19.69
		POLR2B	HUMAN	P30876	DNA-directed RNA polymerase II subunit RPB2	P30876|C9J2Y9|Q8CFI7	0	0	0	0	0	1	1	0	0	0	0	0	0	1	1	0	0	0	0	0	0	831000	2030000	0	135321	2.2	18.83	18.83
		PPIA	HUMAN	P62937	Peptidyl-prolyl cis-trans isomerase A	P62937|P62937-2|F8VPN3|C9J5S7|F8WE65|A0A075B759|Q9Y536|F5H284|E5RIZ5	0	1	0	0	0	1	2	2	0	1	0	0	0	1	2	2	0	1090000	0	0	0	15800000	18700000	2330000	18240.4	42.4	73.27	20.82
		Ppia	MOUSE	P17742	Peptidyl-prolyl cis-trans isomerase A	P17742	0	0	0	0	0	0	2	0	0	0	0	0	0	0	3	0	0	0	0	0	0	0	4930000	0	18142.2	42	73.14	20.69
		PPIB	HUMAN	P23284	Peptidyl-prolyl cis-trans isomerase B	P23284|P24369	1	2	0	0	0	1	1	0	1	2	0	0	0	1	1	0	1380000	5680000	0	0	0	2740000	1670000	0	23799.1	11.1	21.99	21.99
		PPID	HUMAN	Q08752	Peptidyl-prolyl cis-trans isomerase D	Q08752|Q9CR16	0	0	0	0	0	0	2	0	0	0	0	0	0	0	2	0	0	0	0	0	0	0	6660000	0	41162.2	9.4	18.39	18.39
		PPIF	HUMAN	P30405	Peptidyl-prolyl cis-trans isomerase F, mitochondrial	P30405|P30405-2|R4GN99	0	0	0	0	0	1	2	1	0	0	0	0	0	1	2	1	0	0	0	0	0	309000	3620000	440000	22382.2	35.7	32.71	32.71
		PPP1CB	HUMAN	P62140	Serine/threonine-protein phosphatase PP1-beta catalytic subunit	P62140|P62141|P62136-2|P36873-2|F8W0W8|P62136|P36873|F8VYE8|P62136-3|F8VR82|P63087-2|P62137|P63087	0	0	0	0	0	2	2	1	0	0	0	0	0	3	3	1	0	0	0	0	0	3180000	3720000	1520000	37984.9	9.4	24.72	24.72
		PPP2R1A	HUMAN	P30153	Serine/threonine-protein phosphatase 2A 65 kDa regulatory subunit A alpha isoform	P30153|Q76MZ3|B3KQV6	3	1	3	2	0	2	1	1	3	1	3	2	0	3	1	1	7590000	2990000	2080000	12700000	0	95000000	1210000	7850000	66106.2	13	64.91	64.91
		PRDX1	HUMAN	Q06830	Peroxiredoxin-1	Q06830|P32119	2	4	1	0	1	3	3	1	3	6	1	0	2	4	4	2	8110000	23800000	1190000	0	3960000	23500000	16400000	5690000	22338.2	45.7	123.51	52.78
		Prdx1	MOUSE	P35700	Peroxiredoxin-1	P35700|Q13162|O08807	3	6	1	1	2	2	2	2	3	8	1	1	2	3	2	2	11300000	29700000	4010000	2590000	3610000	25300000	13100000	4530000	22404.3	45.2	94.36	47.12
		Prdx2	MOUSE	Q61171	Peroxiredoxin-2	Q61171	0	1	0	0	1	2	2	0	0	1	0	0	1	2	2	0	0	1340000	0	0	178000	1500000	1350000	0	21949.4	27.2	38.2	25.34
		PRDX5	HUMAN	P30044	Peroxiredoxin-5, mitochondrial	P30044|P30044-3|P30044-2|P30044-4|H3BJQ7|P99029|G3UZJ4|P99029-2	0	0	0	0	0	1	2	0	0	0	0	0	0	1	2	0	0	0	0	0	0	4640000	9470000	0	22314.2	13.5	24.18	24.18
		PRKDC	HUMAN	P78527	DNA-dependent protein kinase catalytic subunit	P78527|P78527-2|E7EUY0|P97313	3	12	1	0	3	6	9	6	3	13	1	0	4	7	10	7	2320000	17700000	403000	0	3900000	30100000	27400000	11400000	474044	6.9	226.32	226.32
		PRPF19	HUMAN	Q9UMS4	Pre-mRNA-processing factor 19	Q9UMS4|J3QNL8|Q99KP6-2|Q99KP6|Q99KP6-3	0	2	0	0	1	1	2	1	0	2	0	0	1	3	4	2	0	4720000	0	0	297000	6240000	8670000	670000	55636.2	9.7	32.75	32.75
		PRPF8	HUMAN	Q6P2Q9	Pre-mRNA-processing-splicing factor 8	Q6P2Q9|Q99PV0	1	3	1	0	0	0	0	0	1	3	1	0	0	0	0	0	1100000	4400000	196000	0	0	0	0	0	274908	1.1	26.57	26.57
		PSMA5	HUMAN	P28066	Proteasome subunit alpha type-5	P28066|Q9Z2U1|D3YX79|P28066-2	0	2	0	0	0	0	0	0	0	2	0	0	0	0	0	0	0	5320000	0	0	0	0	0	0	26581.7	12	23.79	23.79
		PSMA7	HUMAN	O14818	Proteasome subunit alpha type-7	O14818|O14818-2|Q8TAA3|Q8TAA3-5|Q8TAA3-2|Q9CWH6|Q9Z2U0	0	2	0	0	0	0	0	0	0	2	0	0	0	0	0	0	0	2610000	0	0	0	0	0	0	28057.5	10.4	17.35	17.35
		PSMC1	HUMAN	P62191	26S protease regulatory subunit 4	P62191|P62191-2|P62192|Q8NB90|Q8NB90-2|Q8NB90-3	0	2	0	0	0	2	2	1	0	2	0	0	0	2	2	1	0	4100000	0	0	0	4770000	5050000	1160000	49354.8	15	45.73	37.32
		PSMC2	HUMAN	P35998	26S protease regulatory subunit 7	P35998|Q8BVQ9|P46471|P35998-2	4	5	0	0	1	4	4	2	4	5	0	0	1	5	4	2	2560000	6490000	0	0	1260000	14300000	12600000	1950000	49032.4	25.1	97.3	97.3
		PSMC3	HUMAN	R4GNH3	26S protease regulatory subunit 6A	R4GNH3|P17980|E9PM69|B7ZCF1|O88685|A2AGN7	0	2	0	0	1	3	3	2	0	2	0	0	1	4	4	2	0	2360000	0	0	727000	14900000	13300000	1300000	47636.8	14.6	59.75	59.75
		PSMC5	HUMAN	P62195	26S protease regulatory subunit 8	P62195|P62195-2|P62196|Q8K1K2	1	2	1	0	0	0	0	0	1	2	1	0	0	0	0	0	880000	2490000	778000	0	0	0	0	0	45796.4	8.1	27.1	18.69
		PSMD11	HUMAN	O00231-2	Isoform 2 of 26S proteasome non-ATPase regulatory subunit 11	O00231-2|O00231|Q8BG32|G3UYL3|G3UYI4	1	2	0	0	0	0	0	0	1	2	0	0	0	0	0	0	946000	1590000	0	0	0	0	0	0	47819.3	5.6	17.07	17.07
		PSMD12	HUMAN	O00232	26S proteasome non-ATPase regulatory subunit 12	O00232|O00232-2	0	0	0	0	0	1	1	0	0	0	0	0	0	1	1	0	0	0	0	0	0	5140000	823000	0	53302.9	7.2	20.85	20.85
		PSME1	HUMAN	Q06323	Proteasome activator complex subunit 1	Q06323|Q06323-2|Q06323-3|P97371|G3X9K9|G3UXY0	1	3	1	0	1	1	0	1	2	3	1	0	1	1	0	1	4680000	10200000	2210000	0	2270000	3870000	0	1920000	28893.7	12.8	30.53	30.53
		PTBP1	HUMAN	P26599-3	Isoform 3 of Polypyrimidine tract-binding protein 1	P26599-3|P26599-2|P26599|Q922I7|Q8BGJ5|P17225|Q8CB58|E9QMW9	0	0	0	0	0	1	2	0	0	0	0	0	0	1	2	0	0	0	0	0	0	1380000	1790000	0	59803.1	6.4	32.74	32.74
		Ptpn6	MOUSE	P29351-2	Isoform 2 of Tyrosine-protein phosphatase non-receptor type 6	P29351-2|P29351|P29351-3|P29350-4|P29350-3|P29350|P29350-2	1	2	2	0	0	2	2	0	1	2	2	0	0	3	2	0	2650000	546000	1620000	0	0	4570000	3630000	0	68058.2	14	55.61	55.61
		Ptprc	MOUSE	S4R1S4	Receptor-type tyrosine-protein phosphatase C	S4R1S4|P06800|P06800-2|S4R2V1|P06800-3|S4R1M0	0	0	0	0	0	1	1	0	0	0	0	0	0	1	1	0	0	0	0	0	0	2010000	4330000	0	146546	1.9	18.36	18.36
		PYGB	HUMAN	P11216	Glycogen phosphorylase, brain form	P11216|Q8CI94	0	0	0	0	0	1	1	0	0	0	0	0	0	1	1	0	0	0	0	0	0	3070000	1400000	0	97378.8	2.1	18.51	18.51
		Rab1	MOUSE	Q5SW88	Ras-related protein Rab-1A	Q5SW88|Q9H0U4|Q5SW87|Q92928|Q9D1G1|E9PLD0|Q5SW86|P61006|Q92930|P61006-2|P55258|P61028|P59190|P59190-2|Q15286|P61026|Q15286-2|H0YMN7|Q3TYH2|Q8K386|Q6PHN9|P61027|P61018-2|Q6IQ22|Q96E17|Q9H082|Q96AX2-3|Q14964|P20336|Q96AX2|P20337|Q96DA2|P20338|O95716|Q96AX2-2|P61018|P20340|P20340-2|Q9NRW1|Q86YS6|Q15771|Q9NRW1-2|B7Z3L0|A8MZI4|Q96AX2-4|A8MTC6|A8MSP2|P20340-4|G3V196|Q15771-2|Q86YS6-2|E9PNB9|Q6PIK3|H3BL…	0	1	0	0	0	1	1	0	0	1	0	0	0	1	1	0	0	314000	0	0	0	1790000	1310000	0	22600.2	33.1	59.62	17.27
		RAB11B	HUMAN	Q15907	Ras-related protein Rab-11B	Q15907|P62491|H3BSC1|Q15907-2|P62491-2|P46638|P62492|G3UZD3|E9Q3P9|G3UY29|B4DQU5|E9Q6B3	0	2	0	0	0	0	0	0	0	2	0	0	0	0	0	0	0	3610000	0	0	0	0	0	0	24602.2	10.5	17.31	17.31
		RAB14	HUMAN	P61106	Ras-related protein Rab-14	P61106|Q91V41	0	2	0	0	0	1	2	0	0	2	0	0	0	1	2	0	0	2260000	0	0	0	5070000	6450000	0	24124.7	25.5	34.57	22.35
		RAB1A	HUMAN	P62820	Ras-related protein Rab-1A	P62820|P62821|E7END7|P62820-2|P62820-3	0	0	0	0	0	0	1	0	0	0	0	0	0	0	1	0	0	0	0	0	0	0	1080000	0	22905.6	34.1	58.71	10.06
		RAB2A	HUMAN	P61019	Ras-related protein Rab-2A	P61019|P61019-2|P53994	0	0	0	0	0	2	2	0	0	0	0	0	0	2	2	0	0	0	0	0	0	8610000	6580000	0	23716.3	14.1	31.44	31.44
		RAB7A	HUMAN	P51149	Ras-related protein Rab-7a	P51149|P51150|C9J8S3|C9J4V0|C9J4S4|C9J7D1	2	6	1	0	0	3	4	0	2	6	1	0	0	3	4	0	1850000	12800000	590000	0	0	11800000	14000000	0	23774.6	33.3	69.81	69.81
		RAC2	HUMAN	P15153	Ras-related C3 botulinum toxin substrate 2	P15153|Q05144|B1AH80|B1AH77|P63000-2|P63000|P60763|Q3TLP8|P63001|P60764|Q9H4E5|P17081|Q9H4E5-2|G3V476|G3V4H1|B1AH79|F8WET9|Q9ER71|Q9ER71-2|Q8R527|D3YX61|F2Z463	2	4	1	1	0	4	4	0	2	5	1	1	0	4	4	0	6900000	24600000	1010000	1260000	0	63400000	89500000	0	21827.8	27.6	70.96	57.71
		RAN	HUMAN	B5MDF5	GTP-binding nuclear protein Ran	B5MDF5|P62826|P62827|Q14AA6|Q61820|B4DV51	5	6	5	5	5	6	6	5	6	11	6	5	5	7	11	7	72200000	133000000	38500000	31400000	37600000	232000000	220000000	80600000	26394.9	30	83.1	83.1
		RANBP1	HUMAN	P43487	Ran-specific GTPase-activating protein	P43487|P43487-2|P34022|H7BX22	0	2	0	0	0	2	1	0	0	2	0	0	0	4	3	0	0	4410000	0	0	0	15200000	8320000	0	23480.9	27.8	36.63	36.63
		RANGAP1	HUMAN	P46060	Ran GTPase-activating protein 1	P46060|P46061	0	2	0	0	0	0	0	0	0	2	0	0	0	0	0	0	0	1830000	0	0	0	0	0	0	63997.2	4.7	17.48	17.48
		RAP1A	HUMAN	P62834	Ras-related protein Rap-1A	P62834|P61224|F5H7Y6|P61224-3|P61224-2|F5GYB5|P62835|Q99JI6|P61224-4|A6NIZ1	2	1	1	0	0	2	1	0	2	1	1	0	0	2	1	0	1970000	2830000	932000	0	0	14800000	4450000	0	21329.1	11.4	20.91	20.91
		RARS	HUMAN	P54136	Arginine--tRNA ligase, cytoplasmic	P54136|P54136-2|E5RJM9|Q9D0I9|E5RH09	3	5	1	0	2	3	6	2	3	5	1	0	2	4	7	3	4340000	11600000	699000	0	2910000	13000000	19600000	6240000	76176.4	17.1	85.89	85.89
		RBM39	HUMAN	Q14498	RNA-binding protein 39	Q14498|Q14498-2|Q14498-3|G3XAC6|Q8VH51|Q8VH51-2|E9Q8F0|Q8VH51-3	1	2	2	0	1	2	3	2	1	2	2	0	1	2	3	2	1230000	3170000	226000	0	1430000	9960000	11200000	3910000	59663.8	7.9	41	41
		RCC1	HUMAN	P18754-2	Isoform 2 of Regulator of chromosome condensation	P18754-2|P18754	0	0	0	0	0	1	1	0	0	0	0	0	0	1	1	0	0	0	0	0	0	1250000	2240000	0	48715.3	7.5	35.56	35.56
		RECQL	HUMAN	P46063	ATP-dependent DNA helicase Q1	P46063	0	0	0	0	0	1	1	0	0	0	0	0	0	1	1	0	0	0	0	0	0	1830000	1050000	0	74483	2.3	18.92	18.92
		RHOA	HUMAN	P61586	Transforming protein RhoA	P61586|Q9QUI0	0	2	0	0	0	0	0	0	0	2	0	0	0	0	0	0	0	3310000	0	0	0	0	0	0	22110.1	10.3	16.74	16.74
		RHOG	HUMAN	P84095	Rho-related GTP-binding protein RhoG	P84095|P84096	2	2	2	0	0	3	3	0	2	2	2	0	0	3	3	0	3150000	4570000	1830000	0	0	24700000	12100000	0	21764.5	36.1	64.84	51.59
		RNH1	HUMAN	P13489	Ribonuclease inhibitor	P13489|E9PMN0|E9PMA9|E9PR82	3	4	3	1	7	8	10	5	3	6	3	1	8	9	11	6	7400000	47600000	4080000	788000	29600000	118000000	114000000	20500000	51798.3	33.6	143.66	143.66
		RPL10	HUMAN	P27635	60S ribosomal protein L10	P27635|Q6ZWV3|F8W7C6|P86048	0	0	0	0	1	2	1	1	0	0	0	0	1	2	1	1	0	0	0	0	872000	6080000	5380000	1150000	25059.9	18.6	19.21	19.21
		RPL10A	HUMAN	P62906	60S ribosomal protein L10a	P62906|P53026|Q5XJF6	1	3	1	1	0	2	2	0	1	3	1	1	0	2	2	0	2490000	9940000	1170000	637000	0	17600000	10300000	0	25002	13.3	26.23	26.23
		RPL11	HUMAN	P62913	60S ribosomal protein L11	P62913|P62913-2|E9PYL9|Q9CXW4|E9PZB3	4	2	2	1	1	2	2	1	5	3	2	1	1	2	2	1	19800000	17900000	5900000	2550000	7190000	46200000	37600000	7530000	20480.2	21.3	45.89	45.89
		RPL12	HUMAN	P30050	60S ribosomal protein L12	P30050|P35979|P30050-2	1	2	1	0	1	2	2	2	1	2	1	0	1	2	2	2	1080000	3940000	527000	0	796000	8410000	3040000	1870000	17989.4	24.8	34.38	34.38
		RPL13	HUMAN	P26373	60S ribosomal protein L13	P26373|P47963|P26373-2	2	3	2	1	1	3	3	1	2	3	2	1	1	3	3	1	6370000	14600000	3820000	2550000	1540000	43300000	29200000	1610000	24318.1	15.6	31.97	31.97
		RPL13A	HUMAN	P40429	60S ribosomal protein L13a	P40429|Q6NVV1|E9Q5A0|P19253|M0QZU1	3	4	1	1	1	2	2	1	3	5	1	1	1	2	2	1	11700000	27600000	3300000	6220000	8000000	48200000	31000000	9750000	23633.9	20.1	36.02	36.02
		RPL14	HUMAN	P50914	60S ribosomal protein L14	P50914|E7EPB3|Q9CR57	0	0	0	0	1	2	2	1	0	0	0	0	1	2	2	1	0	0	0	0	255000	36200000	26200000	230000	23545.5	9.7	23.17	23.17
		RPL15	HUMAN	P61313	60S ribosomal protein L15	P61313|Q9CZM2|E9QAZ2|P61313-2	1	2	1	1	1	2	2	1	1	2	1	1	1	2	2	1	4740000	14200000	2030000	6650000	1230000	29500000	26600000	1440000	24259.7	11.2	29.19	29.19
		RPL17	HUMAN	P18621-3	Isoform 3 of 60S ribosomal protein L17	P18621-3|P18621|J3QLC8|Q9CPR4|Q6ZWZ7|P18621-2|B2RY53	2	2	1	0	0	1	1	0	3	3	1	0	0	1	1	0	9480000	17700000	2800000	0	0	14700000	3550000	0	26714.6	10.5	20.43	20.43
		RPL18	HUMAN	Q07020	60S ribosomal protein L18	Q07020|G3V203|Q07020-2|A0A075B7A0|F8VYV2|P35980|G3UZK4	1	4	0	1	1	4	2	1	1	4	0	1	1	4	2	1	1730000	14700000	0	5500000	1560000	30600000	12300000	1870000	21748.2	30.8	49.09	49.09
		RPL18A	HUMAN	Q02543	60S ribosomal protein L18a	Q02543|M0R117|M0R1A7|P62717|M0R0P7|F6YJW4	2	2	2	2	1	3	2	1	2	2	2	2	1	3	2	1	5480000	4080000	3030000	1550000	6150000	33900000	25300000	8120000	21047.3	22.1	35.89	35.89
		RPL19	HUMAN	P84098	60S ribosomal protein L19	P84098|J3KTE4|J3QR09|P84099|A2A547	1	2	1	1	1	1	1	0	1	2	1	1	1	1	1	0	3250000	7190000	1750000	2740000	2700000	10700000	9570000	0	23579.7	13.2	24.48	24.48
		RPL22	HUMAN	P35268	60S ribosomal protein L22	P35268|K7ERI7|K7EKS7|P67984	2	1	2	0	2	2	2	2	2	1	2	0	2	2	2	2	5050000	8170000	3650000	0	7580000	37000000	26800000	10400000	14843.8	18.7	23.85	23.85
		RPL23	HUMAN	P62829	60S ribosomal protein L23	P62829|P62830|J3KT29|B9ZVP7|J3KTJ3	1	2	1	1	1	2	3	2	1	2	1	1	1	3	4	2	5010000	7530000	2730000	3450000	1270000	45700000	42100000	10800000	14979.3	32.1	46	46
		RPL23A	HUMAN	A8MUS3	60S ribosomal protein L23a	A8MUS3|P62750|P62751|K7EMA7|D3YTY6	1	2	1	0	0	1	1	0	1	2	1	0	0	1	1	0	1720000	6470000	1090000	0	0	14900000	7280000	0	22029.9	11.8	24.69	24.69
		RPL24	HUMAN	P83731	60S ribosomal protein L24	P83731|C9JNW5|C9JXB8|Q8BP67	0	2	0	0	0	1	2	0	0	2	0	0	0	1	2	0	0	2920000	0	0	0	2940000	6720000	0	17892.7	19.7	31.75	31.75
		RPL27A	HUMAN	P46776	60S ribosomal protein L27a	P46776|E9PLX7|E9PLL6|E9PJD9	1	1	1	0	0	1	1	1	1	1	1	0	0	1	1	1	3650000	10400000	2460000	0	0	24900000	15800000	5380000	16675.2	7.4	15.52	15.52
		RPL28	HUMAN	P46779-3	Isoform 3 of 60S ribosomal protein L28	P46779-3|H0YKD8|P46779-2|P46779|H0YMF4|P46779-5|H0YLP6|P46779-4|P41105	1	2	2	2	0	0	2	0	1	2	2	2	0	0	2	0	2010000	12800000	5740000	16200000	0	0	23400000	0	19490.3	17.7	32.35	32.35
		RPL3	HUMAN	P39023	60S ribosomal protein L3	P39023|G5E9G0|P27659	0	0	0	0	0	1	2	0	0	0	0	0	0	1	2	0	0	0	0	0	0	4430000	2990000	0	46393.3	7.9	18.47	18.47
		RPL30	HUMAN	P62888	60S ribosomal protein L30	P62888|P62889	0	0	0	0	1	1	1	1	0	0	0	0	1	1	1	1	0	0	0	0	294000	2770000	3560000	729000	12955	13.9	16.18	16.18
		RPL32	HUMAN	F8W727	60S ribosomal protein L32	F8W727|P62910|P62911|A2AD25	0	0	0	0	0	0	2	0	0	0	0	0	0	0	2	0	0	0	0	0	0	0	5830000	0	18133	17.6	20.97	20.97
		RPL34	HUMAN	P49207	60S ribosomal protein L34	P49207|Q9D1R9|D3YWC0	0	2	0	0	0	0	0	0	0	2	0	0	0	0	0	0	0	3300000	0	0	0	0	0	0	13520.9	14.5	17.23	17.23
		RPL4	HUMAN	P36578	60S ribosomal protein L4	P36578|H3BM89|Q9D8E6	3	6	1	3	2	5	6	2	3	6	1	4	2	5	6	2	9210000	20300000	3450000	8120000	4160000	32300000	23300000	4760000	47981.8	23.6	99.53	99.53
		RPL5	HUMAN	P46777	60S ribosomal protein L5	P46777|P47962	1	5	0	0	0	2	1	0	1	5	0	0	0	2	1	0	1400000	11200000	0	0	0	12200000	2530000	0	34590.2	17.5	48.94	48.94
		RPL6	HUMAN	Q02878	60S ribosomal protein L6	Q02878|E9PUX4|P47911	1	4	1	0	0	2	1	0	1	4	1	0	0	2	1	0	4540000	12600000	2130000	0	0	14300000	7730000	0	32784.4	12.1	34.24	34.24
		RPL7	HUMAN	P18124	60S ribosomal protein L7	P18124|A8MUD9	2	2	2	2	2	2	2	2	2	2	2	2	2	2	2	2	12000000	27400000	5260000	3580000	6470000	25900000	15400000	8680000	29282.3	30.2	74.47	24.8
		Rpl7	MOUSE	P14148	60S ribosomal protein L7	P14148	1	2	1	1	1	1	1	1	1	2	1	1	1	1	1	1	4690000	9460000	1390000	2600000	5420000	21700000	12200000	7600000	31476.1	24	58.2	18.24
		RPL7A	HUMAN	P62424	60S ribosomal protein L7a	P62424|P12970|Q5T8U2|F6SSI5|F6VBB8	2	5	2	1	2	4	4	1	2	5	2	1	2	4	4	1	8250000	28400000	3420000	2820000	1840000	66400000	47500000	11900000	30166.2	26.6	76.01	76.01
		RPL8	HUMAN	P62917	60S ribosomal protein L8	P62917|P62918|G3V1A1|E9PP36	1	5	0	0	0	2	1	1	1	5	0	0	0	2	1	1	457000	15200000	0	0	0	24100000	15900000	1320000	28252.4	20.2	49.74	49.74
		RPL9	HUMAN	P32969	60S ribosomal protein L9	P32969	0	0	0	0	1	1	1	1	0	0	0	0	2	2	2	2	0	0	0	0	4720000	18600000	14600000	4700000	21977.1	9.8	16.52	16.52
		RPLP0	HUMAN	P05388	60S acidic ribosomal protein P0	P05388|F8VWS0|P05388-2|G3V210|E9Q070|P14869|Q8NHW5|F8VRK7|F8VQY6|F8W1K8	1	5	0	0	2	5	3	2	1	5	0	0	2	5	3	2	1280000	12100000	0	0	6210000	23500000	14500000	7910000	34444.1	35.9	102.24	102.24
		RPS11	HUMAN	P62280	40S ribosomal protein S11	P62280|P62281|M0R1H5	0	0	0	0	0	1	2	0	0	0	0	0	0	1	2	0	0	0	0	0	0	9670000	8670000	0	18601.6	16.4	18.36	18.36
		RPS12	HUMAN	P25398	40S ribosomal protein S12	P25398|Q6ZWZ6|P63323	2	1	0	0	1	2	2	1	2	1	0	0	3	5	4	5	4470000	2460000	0	0	6760000	22600000	13800000	10700000	14914.1	22.7	34.28	34.28
		RPS14	HUMAN	P62263	40S ribosomal protein S14	P62263|P62264|E5RH77	1	3	2	1	1	2	4	0	1	3	2	1	1	2	4	0	6440000	20700000	5720000	3320000	5830000	63100000	50200000	0	16443.6	31.7	51.81	51.81
		RPS15A	HUMAN	P62244	40S ribosomal protein S15a	P62244|I3L3P7|P62245|I3L246|I3L303|H3BT37|H3BV27	0	3	0	0	0	0	0	0	0	3	0	0	0	0	0	0	0	5170000	0	0	0	0	0	0	14953.4	20	26.88	26.88
		RPS16	HUMAN	P62249	40S ribosomal protein S16	P62249|M0R210|P14131|Q6IPX4|M0R3H0	1	2	0	1	0	2	2	0	1	2	0	1	0	2	2	0	1070000	8030000	0	3060000	0	7570000	5260000	0	16559.1	12.3	21.62	21.62
		RPS17	HUMAN	A0A075B716	40S ribosomal protein S17	A0A075B716|H0YN88|P0CW22|P63276	0	0	0	0	1	1	2	2	0	0	0	0	2	2	3	3	0	0	0	0	4030000	15200000	13600000	6090000	21927.8	12	27.38	27.38
		RPS2	HUMAN	P15880	40S ribosomal protein S2	P15880|E9PQD7|P25444|J3QMG5|F6YTZ4|D3YWJ3|E9Q1N8|E9PM36|D3Z536	1	2	1	2	1	2	2	1	1	2	1	2	1	2	2	1	11000000	3970000	5350000	6890000	6780000	31800000	19600000	9940000	31609.1	11.6	34.67	34.67
		RPS20	HUMAN	P60866-2	Isoform 2 of 40S ribosomal protein S20	P60866-2|P60866|P60867|E5RJX2|E5RIP1|G3XAN0	1	2	0	0	0	2	1	0	1	3	0	0	0	2	1	0	1770000	14300000	0	0	0	22800000	9890000	0	16176.5	21.1	34.64	34.64
		RPS25	HUMAN	P62851	40S ribosomal protein S25	P62851|P62852	1	2	1	0	0	0	0	0	1	2	1	0	0	0	0	0	5200000	11600000	2310000	0	0	0	0	0	13798.9	15.2	21.42	21.42
		RPS26	HUMAN	P62854	40S ribosomal protein S26	P62854|P62855|Q5JNZ5	0	0	0	0	1	2	2	1	0	0	0	0	1	2	2	1	0	0	0	0	1230000	14900000	10300000	1380000	13300.5	20.8	17.82	17.82
		RPS27L	HUMAN	H0YMV8	40S ribosomal protein S27	H0YMV8|Q71UM5|P42677|Q6ZWY3|Q6ZWU9|C9JLI6|Q5T4L4|D3YYB0|D6RH49	0	0	0	0	0	2	2	0	0	0	0	0	0	2	2	0	0	0	0	0	0	11900000	14400000	0	11858.8	21	25.86	25.86
		RPS3	HUMAN	P23396	40S ribosomal protein S3	P23396|P62908|P23396-2|E9PPU1|E9PL09|F2Z2S8|D3YV43|E9PJH4|E9PQ96|E9PSF4|E9PQX2	5	9	3	1	2	7	7	1	5	10	3	1	2	8	7	1	16600000	55800000	7100000	2180000	4500000	127000000	142000000	9810000	26859	51	132.37	132.37
		RPS3A	HUMAN	P61247	40S ribosomal protein S3a	P61247|P97351|D6RAT0|E9PFI5|D6R9B6	3	4	2	2	0	2	2	0	3	5	2	2	0	2	2	0	9840000	16300000	3820000	3220000	0	42900000	27400000	0	30172.6	20.8	50.36	50.36
		RPS4X	HUMAN	P62701	40S ribosomal protein S4, X isoform	P62701|P62702|A6NH36|Q8TD47|Q3V1Z5|P22090|V9GWY0	2	4	0	0	2	3	2	2	2	4	0	0	2	4	2	2	4550000	12000000	0	0	5490000	54100000	17500000	5680000	29825.4	20.5	54.92	54.92
		RPS5	HUMAN	M0R0R2	40S ribosomal protein S5	M0R0R2|P46782|M0QZN2	1	1	1	1	1	1	1	1	1	1	1	1	1	1	1	1	7630000	7360000	4270000	5510000	7080000	19800000	12900000	7960000	25504	25.3	63.81	17.35
		Rps5	MOUSE	Q91V55	40S ribosomal protein S5	Q91V55|P97461	0	0	0	0	1	1	0	0	0	0	0	0	1	1	0	0	0	0	0	0	3760000	9080000	0	0	23047.2	27.9	57.33	10.87
		RPS6	HUMAN	P62753	40S ribosomal protein S6	P62753|P62754|A2A3R5|A2A3R7	3	6	1	1	2	3	3	1	3	6	1	1	2	3	4	1	11300000	23000000	4770000	4100000	7990000	56100000	52000000	10800000	28851.3	22.4	70.14	70.14
		RPS7	HUMAN	P62081	40S ribosomal protein S7	P62081|P62082|F6SVV1	0	0	0	0	0	2	1	0	0	0	0	0	0	2	1	0	0	0	0	0	0	8620000	899000	0	22126.4	10.3	17.85	17.85
		RPS8	HUMAN	P62241	40S ribosomal protein S8	P62241|Q5JR95|P62242	2	3	2	0	2	3	3	2	2	3	2	0	2	3	3	2	10100000	24100000	4630000	0	8910000	75700000	44400000	11800000	24490	16.3	45.22	45.22
		RPS9	HUMAN	P46781	40S ribosomal protein S9	P46781|Q6ZWN5|C9JM19|B5MCT8|Q9CXW7|D3YWH9	1	5	0	1	1	3	2	1	1	5	0	1	1	3	2	1	5170000	21200000	0	1230000	475000	21000000	9320000	577000	22648.1	26.2	61.61	61.61
		RPSA	HUMAN	P08865	40S ribosomal protein SA	P08865|P14206|A6NE09	2	4	2	2	2	5	5	3	2	4	2	3	3	6	7	4	13100000	23300000	5810000	5450000	1990000	72100000	32000000	2500000	32967.6	34.5	104.9	104.9
		RRP12	HUMAN	Q5JTH9	RRP12-like protein	Q5JTH9|Q5JTH9-3|Q5JTH9-2|F5H456|Q6P5B0	0	0	0	0	0	1	2	0	0	0	0	0	0	1	2	0	0	0	0	0	0	4480000	4550000	0	145126	2.5	17.67	17.67
		RTCB	HUMAN	Q9Y3I0	tRNA-splicing ligase RtcB homolog	Q9Y3I0|Q99LF4	0	2	0	0	0	0	0	0	0	2	0	0	0	0	0	0	0	2690000	0	0	0	0	0	0	55722.8	4.9	15.27	15.27
		RTN4	HUMAN	Q9NQC3	Reticulon-4	Q9NQC3|Q9NQC3-5|Q9NQC3-2|F8W914	0	0	0	0	0	2	2	0	0	0	0	0	0	2	2	0	0	0	0	0	0	8020000	4300000	0	130328	3.9	25.4	25.4
		RUVBL1	HUMAN	Q9Y265	RuvB-like 1	Q9Y265|P60122|Q9Y265-2|E7ETR0	0	0	0	0	0	2	4	0	0	0	0	0	0	2	4	0	0	0	0	0	0	7910000	7410000	0	50569.4	14.2	60.95	60.95
		RUVBL2	HUMAN	Q9Y230	RuvB-like 2	Q9Y230|X6R2L4|Q9WTM5|M0R0Z0|Q9Y230-2|M0R0Y3	0	2	0	0	0	0	0	0	0	2	0	0	0	0	0	0	0	1410000	0	0	0	0	0	0	51326.8	4.9	15.65	15.65
		SAMHD1	HUMAN	Q9Y3Z3	Deoxynucleoside triphosphate triphosphohydrolase SAMHD1	Q9Y3Z3|Q9Y3Z3-3|Q9Y3Z3-4|Q9Y3Z3-2	0	4	0	0	0	0	0	0	0	4	0	0	0	0	0	0	0	2920000	0	0	0	0	0	0	72940.9	10.7	34.49	24.49
		Samhd1	MOUSE	F8WJE0	Deoxynucleoside triphosphate triphosphohydrolase SAMHD1	F8WJE0|E9Q0K6|Q60710|E9PYG9	1	2	0	0	0	0	1	0	1	2	0	0	0	0	1	0	1150000	2890000	0	0	0	0	913000	0	76861.6	5.3	37.54	27.54
		SEC13	HUMAN	P55735-3	Isoform 3 of Protein SEC13 homolog	P55735-3|P55735|P55735-2|A8MXL6|Q9D1M0	0	0	0	0	0	1	1	0	0	0	0	0	0	1	1	0	0	0	0	0	0	1860000	2460000	0	41430.7	6.2	15.35	15.35
		SEC22B	HUMAN	O75396	Vesicle-trafficking protein SEC22b	O75396|O08547|E9Q6R3	1	1	0	0	0	1	2	0	1	1	0	0	0	1	2	0	592000	1630000	0	0	0	7170000	7400000	0	24821.1	20	39.11	39.11
		SF3B3	HUMAN	Q15393	Splicing factor 3B subunit 3	Q15393|Q921M3|Q921M3-2|Q15393-3	0	2	0	0	0	0	0	0	0	2	0	0	0	0	0	0	0	6160000	0	0	0	0	0	0	136659	2.4	22.47	22.47
		Sfpq	MOUSE	Q8VIJ6	Splicing factor, proline- and glutamine-rich	Q8VIJ6|P23246|P23246-2	1	2	1	0	2	4	3	0	1	2	1	0	3	5	4	0	1050000	4050000	416000	0	129000000	47200000	12400000	0	75554.5	14.4	68.16	68.16
		SHMT2	HUMAN	P34897	Serine hydroxymethyltransferase, mitochondrial	P34897|P34897-3|P34897-2|G3V540|G3V2E4|Q9CZN7	0	0	0	0	0	0	2	0	0	0	0	0	0	0	2	0	0	0	0	0	0	0	5600000	0	56448.4	5.3	20.82	20.82
		SLC25A22	HUMAN	Q9H936	Mitochondrial glutamate carrier 1	Q9H936|Q9H1K4|Q9D6M3|Q9DB41|Q9DB41-2|E9Q6M6|E9Q579|Q80X52	0	0	0	0	0	2	3	0	0	0	0	0	0	2	3	0	0	0	0	0	0	12500000	13400000	0	34926	18.8	37.71	37.71
		Slc25a4	MOUSE	P48962	ADP/ATP translocase 1	P48962	2	2	1	1	0	1	1	1	2	2	1	1	0	1	1	1	6740000	9260000	4340000	5090000	0	15900000	14300000	10200000	33131.9	5.7	17	17
		SLC25A5	HUMAN	P05141	ADP/ATP translocase 2	P05141|P51881	3	2	3	2	0	3	4	2	3	2	3	2	0	3	4	2	12400000	12700000	7430000	7130000	0	22400000	23800000	12800000	33079.8	12.7	53.81	53.81
		SLC25A6	HUMAN	P12236	ADP/ATP translocase 3	P12236	2	3	2	2	0	1	3	1	2	3	2	2	0	1	3	1	8040000	12600000	5770000	6150000	0	15900000	18400000	10200000	33093.9	12.7	48.03	48.03
		SMC2	HUMAN	O95347	Structural maintenance of chromosomes protein 2	O95347|O95347-2|Q8CG48	0	4	0	0	0	0	0	0	0	4	0	0	0	0	0	0	0	3390000	0	0	0	0	0	0	136167	4	23.45	23.45
		SND1	HUMAN	Q7KZF4	Staphylococcal nuclease domain-containing protein 1	Q7KZF4|Q78PY7|Q3TJ56	3	4	1	0	0	3	3	0	3	5	1	0	0	5	4	0	4550000	9590000	715000	0	0	7870000	5680000	0	102680	9.4	74.22	74.22
		SNRNP70	HUMAN	P08621	U1 small nuclear ribonucleoprotein 70 kDa	P08621|P08621-2|P08621-3|Q62376|Q62376-2	1	2	1	0	0	0	0	0	1	2	1	0	0	0	0	0	1970000	6060000	571000	0	0	0	0	0	51612.9	6.6	22.27	22.27
		SNX3	HUMAN	O60493	Sorting nexin-3	O60493|Q78ZM0|O70492|O60493-4|O60493-2|D3Z6Z0|D3Z789	1	2	1	0	0	0	0	0	1	2	1	0	0	0	0	0	1320000	3800000	771000	0	0	0	0	0	18819.1	9.8	15.56	15.56
		SQSTM1	HUMAN	Q13501	Sequestosome-1	Q13501|Q13501-2|E7EMC7|Q64337	0	1	0	0	1	2	3	1	0	1	0	0	1	2	3	1	0	1550000	0	0	1670000	19300000	31000000	3220000	48485.1	20.6	46.79	46.79
		SRI	HUMAN	P30626	Sorcin	P30626|P30626-2|P30626-3|C9J0K6|Q6P069|Q6P069-2	1	2	0	0	0	0	0	0	1	2	0	0	0	0	0	0	1790000	1890000	0	0	0	0	0	0	21961.3	11.1	18.78	18.78
		SRM	HUMAN	P19623	Spermidine synthase	P19623	0	0	0	0	1	1	1	0	0	0	0	0	1	1	1	0	0	0	0	0	1550000	3340000	3440000	0	34394.6	7.9	16.13	16.13
		SRRT	HUMAN	Q9BXP5	Serrate RNA effector molecule homolog	Q9BXP5|Q9BXP5-3|Q9BXP5-2|Q9BXP5-4|Q9BXP5-5|Q99MR6|Q99MR6-2	0	0	0	0	0	2	1	1	0	0	0	0	0	2	1	1	0	0	0	0	0	4430000	3100000	1630000	101121	5.8	18.63	18.63
		SRSF2	HUMAN	Q01130	Serine/arginine-rich splicing factor 2	Q01130|Q01130-2|Q62093	1	3	1	0	1	0	0	0	1	3	1	0	1	0	0	0	1420000	12400000	989000	0	774000	0	0	0	25475.9	18.5	38.17	38.17
		SRSF3	HUMAN	P84103	Serine/arginine-rich splicing factor 3	P84103|P84103-2|P84104|P84104-2|A2A4X6	1	2	0	0	0	0	0	0	1	2	0	0	0	0	0	0	2240000	5150000	0	0	0	0	0	0	19557.5	10.3	26.61	26.61
		SRSF4	HUMAN	Q08170	Serine/arginine-rich splicing factor 4	Q08170|Q13247|Q13247-3|A2A837|Q542V3|Q8VE97|Q3TWW8	1	1	0	0	0	0	0	0	1	1	0	0	0	0	0	0	1340000	1620000	0	0	0	0	0	0	56791.5	4.2	24.48	14.24
		SRSF5	HUMAN	Q13243	Serine/arginine-rich splicing factor 5	Q13243|Q13243-3|B4DUA4|B4DJK0|Q9D8S5|O35326|Q13243-2|G3V5K8	1	1	0	0	0	0	0	0	1	1	0	0	0	0	0	0	1010000	1060000	0	0	0	0	0	0	31377.4	7.7	18.97	8.73
		SSR3	HUMAN	Q9UNL2-2	Isoform 2 of Translocon-associated protein subunit gamma	Q9UNL2-2|Q9UNL2|C9JA28|Q9DCF9|Q9DCF9-2	0	0	0	0	0	0	1	0	0	0	0	0	0	0	1	0	0	0	0	0	0	0	795000	0	22666.9	7	16.91	16.91
		SSRP1	HUMAN	Q08945	FACT complex subunit SSRP1	Q08945|Q08943-2|Q08943	0	0	0	0	0	1	0	1	0	0	0	0	0	1	0	1	0	0	0	0	0	699000	0	436000	81415.7	5.3	18.61	18.61
		STAT1	HUMAN	P42224	Signal transducer and activator of transcription 1-alpha/beta	P42224|P42224-2|J3KPM9|D2KFR9	2	4	0	0	1	4	3	0	2	4	0	0	1	5	3	0	3520000	12200000	0	0	1430000	10100000	6670000	0	87903.7	21.4	145.04	81.95
		Stat1	MOUSE	Q8C3V4	Signal transducer and activator of transcription	Q8C3V4|P42225	0	2	0	0	0	0	0	0	0	2	0	0	0	0	0	0	0	2400000	0	0	0	0	0	0	87940.6	11.3	77.39	14.3
		STIP1	HUMAN	P31948-2	Isoform 2 of Stress-induced-phosphoprotein 1	P31948-2|P31948|P31948-3|Q60864|F5H783|F5GXD8	0	0	0	0	1	3	1	0	0	0	0	0	1	3	1	0	0	0	0	0	1130000	8340000	3750000	0	68763.9	7.7	43.72	43.72
		STRAP	HUMAN	B4DNJ6	Serine-threonine kinase receptor-associated protein	B4DNJ6|Q9Y3F4|Q9Z1Z2	0	0	0	0	0	1	2	1	0	0	0	0	0	1	2	1	0	0	0	0	0	4750000	4300000	1420000	40119.4	9	18.97	18.97
		SUCLG2	HUMAN	Q96I99-2	Isoform 2 of Succinyl-CoA ligase [GDP-forming] subunit beta, mitochondrial	Q96I99-2|Q96I99|E9PDQ8|Q9Z2I8|Q9Z2I8-2	0	0	0	0	1	1	1	0	0	0	0	0	1	1	1	0	0	0	0	0	351000	556000	2080000	0	48187.6	5.6	15.1	15.1
		Sun2	MOUSE	Q8BJS4	SUN domain-containing protein 2	Q8BJS4|Q8BJS4-2|Q8BJS4-3|Q9UH99-2|Q9UH99|Q9UH99-3	2	1	2	1	0	0	0	0	2	1	2	1	0	0	0	0	1940000	974000	812000	156000	0	0	0	0	81775.1	3.2	22.43	22.43
		SYNCRIP	HUMAN	O60506	Heterogeneous nuclear ribonucleoprotein Q	O60506|O60506-3|Q7TMK9|Q7TMK9-2|O60506-5|G3UZ48|O60506-2|O60506-4|G3V018|G3UZI2|G3UXJ6	0	1	0	0	0	2	1	0	0	1	0	0	0	3	1	0	0	1350000	0	0	0	426000	291000	0	69829.6	11	24.36	24.36
		TAF15	HUMAN	Q92804	TATA-binding protein-associated factor 2N	Q92804|Q92804-2|A0A075B7D9|H3BPE7|P35637|P35637-2|Q8BQ46|P56959|Q8CFQ9	1	2	1	1	0	2	1	1	1	2	1	1	0	2	1	1	2230000	3520000	1290000	2650000	0	12900000	6520000	5910000	62057.1	9.6	32.48	32.48
		Tagln2	MOUSE	Q9WVA4	Transgelin-2	Q9WVA4|P37802-2|P37802	0	3	0	0	0	1	2	0	0	3	0	0	0	1	2	0	0	3850000	0	0	0	462000	654000	0	22566.2	32.6	42.84	42.84
		Tardbp	MOUSE	Q921F2	TAR DNA-binding protein 43	Q921F2|Q6VYI5|Q6VYI4|Q8BLD4|Q8R0B4|Q13148|G3V162|B1AKP7|Q13148-4|K7EJ99	0	0	0	0	1	2	3	0	0	0	0	0	1	3	5	0	0	0	0	0	1460000	9000000	23200000	0	44946.3	14	27.09	27.09
		TARS	HUMAN	P26639	Threonine--tRNA ligase, cytoplasmic	P26639|P26639-2|Q9D0R2	1	3	0	0	0	2	2	0	1	3	0	0	0	4	3	0	566000	5190000	0	0	0	10600000	7290000	0	84346.4	8	41.01	41.01
		TCP1	HUMAN	P17987	T-complex protein 1 subunit alpha	P17987|P11983|E7ERF2|F5GZI8|P11983-2|F2Z483|F5GYL4|E7EQR6|F5H282	2	4	1	0	1	3	4	2	2	4	1	0	1	4	4	2	2900000	5600000	741000	0	569000	13800000	9470000	1670000	60856	16.1	84.95	84.95
		Tkt	MOUSE	P40142	Transketolase	P40142|P29401-2|P29401|B4E022|E9PFF2|F8W888	2	6	0	0	1	5	6	2	3	6	0	0	1	6	6	2	7350000	13300000	0	0	1520000	46200000	39800000	4590000	68313.9	21.9	102.18	102.18
		Tln1	MOUSE	P26039	Talin-1	P26039|Q9Y490|Q9Y4G6|E9PUM4|Q71LX4	10	18	7	1	10	19	16	6	10	20	7	1	14	24	23	8	17100000	40300000	9990000	2170000	25500000	61500000	60400000	15900000	271985	20.4	398.45	398.45
		TMEM43	HUMAN	Q9BTV4	Transmembrane protein 43	Q9BTV4|Q9DBS1	0	0	0	0	0	1	1	0	0	0	0	0	0	1	1	0	0	0	0	0	0	1310000	1290000	0	44931.8	7	15.62	15.62
		TMPO	HUMAN	P42167	Lamina-associated polypeptide 2, isoforms beta/gamma	P42167|G5E972|P42167-2|P42166|P42167-3|Q61029|Q61029-3|Q61029-2|Q61029-4	0	0	0	0	0	1	2	0	0	0	0	0	0	2	3	0	0	0	0	0	0	1890000	3390000	0	50726.4	9	30.81	30.81
		TNPO1	HUMAN	Q92973	Transportin-1	Q92973|Q92973-2|Q92973-3|Q8BFY9|Q8BFY9-2	0	2	0	0	0	0	0	0	0	2	0	0	0	0	0	0	0	2290000	0	0	0	0	0	0	103837	3.2	21.22	21.22
		TOMM70A	HUMAN	O94826	Mitochondrial import receptor subunit TOM70	O94826|Q9CZW5	0	0	0	0	0	1	0	0	0	0	0	0	0	1	0	0	0	0	0	0	0	693000	0	0	68138.3	2.4	16.18	16.18
		TPI1	HUMAN	P60174	Triosephosphate isomerase	P60174|P60174-1|P17751|P60174-4|H7BXC3	0	0	0	0	0	2	1	1	0	0	0	0	0	2	1	1	0	0	0	0	0	2400000	984000	3540000	31075.7	15	20.46	20.46
		TPM3	HUMAN	P06753-2	Isoform 2 of Tropomyosin alpha-3 chain	P06753-2|P06753-3|P06753-5|P06753-6|P06753-4|Q5VU59|Q5VU61|D6R904|D6RFM2	1	0	0	0	0	0	0	0	1	0	0	0	0	0	0	0	819000	0	0	0	0	0	0	0	29260.4	13.3	20.38	4.98
		Tpm3	MOUSE	P21107-2	Isoform 2 of Tropomyosin alpha-3 chain	P21107-2|D3Z2H9|D3Z6I8|E9Q7Q3|Q6ZN40|J3KN67|P06753|P09493-3|P09493-10|P09493-4|P09493-8|P09493-9|P09493|P09493-7|P09493-6|B7Z596|H7BYY1|H0YK48|F5H7S3|P09493-5|P09493-2|P06753-7|H0YK20|F8WID5|E9Q5J9|Q8K0Z5|E9Q454|P21107|E9Q450|Q8BP43|E9Q448|P58771-2|Q8BSH3|P58771|B7ZNL3|E9Q452|E9Q455|G5E8R2|E9Q456|G5E8R1|E9Q453|G5E8R0	1	0	0	0	0	0	0	0	1	0	0	0	0	0	0	0	1230000	0	0	0	0	0	0	0	29248.3	13.3	23.47	8.07
		TPM4	HUMAN	P67936	Tropomyosin alpha-4 chain	P67936	0	1	1	0	0	0	0	0	0	1	1	0	0	0	0	0	0	1250000	109000	0	0	0	0	0	28635.4	12.9	20.26	15.54
		Tpm4	MOUSE	Q6IRU2	Tropomyosin alpha-4 chain	Q6IRU2	0	1	0	0	0	0	0	0	0	1	0	0	0	0	0	0	0	1070000	0	0	0	0	0	0	28581.3	12.9	21.31	11.79
		TRAP1	HUMAN	Q12931	Heat shock protein 75 kDa, mitochondrial	Q12931|Q12931-2|I3L0K7|Q9CQN1	1	4	0	0	0	4	4	1	1	4	0	0	0	4	5	1	1200000	9090000	0	0	0	12300000	8460000	499000	80393.8	15.1	92.66	75.06
		TRIM28	HUMAN	Q13263	Transcription intermediary factor 1-beta	Q13263|Q13263-2|Q62318|Q62318-2	3	6	2	0	3	8	10	3	4	7	2	0	3	8	12	3	14200000	29100000	3150000	0	5580000	50500000	65000000	12800000	90316.8	36.1	155.42	155.42
		TUBA1B	HUMAN	P68363	Tubulin alpha-1B chain	P68363|P05213|P68363-2|Q71U36|Q71U36-2|P68369|Q13748|P05214|Q13748-2|Q6PEY2|Q9NY65|Q9NY65-2|Q9JJZ2|F8VS66|Q9H853|A6NHL2|A6NHL2-2|F8W0F6	0	0	0	0	1	1	1	1	0	0	0	0	1	1	1	1	0	0	0	0	19600000	57600000	34600000	24400000	50835.4	46.3	206.84	10.26
		TUBA1C	HUMAN	F5H5D3	Tubulin alpha-1C chain	F5H5D3|Q9BQE3|P68373	0	0	0	0	0	1	1	1	0	0	0	0	0	1	1	1	0	0	0	0	0	26100000	19000000	9430000	58642	32.7	176.41	10.64
		TUBA4A	HUMAN	P68366	Tubulin alpha-4A chain	P68366|P68366-2|P68368	1	1	1	0	0	0	0	0	1	1	1	0	0	0	0	0	947000	2610000	865000	0	0	0	0	0	50665.2	34.1	154.6	8.44
		TUBB	HUMAN	P07437	Tubulin beta chain	P07437|P99024|Q5JP53|Q5ST81|A6NNZ2|A0A075B736|I3L2F9|Q5SQY0|Q9H4B7|A2AQ07|G3V2N6|G3V3R4|G3V2R8|G3V5W4|M0R2T4|G3V3W7|G3V3J6|G3V4U2	2	2	2	2	2	2	2	2	7	9	7	6	4	8	9	5	66900000	125000000	39600000	79500000	52100000	244000000	265000000	69300000	50126.4	57.4	235.64	32.8
		TUBB3	HUMAN	Q13509	Tubulin beta-3 chain	Q13509|Q9ERD7|Q13509-2	0	1	0	1	1	1	1	1	0	1	0	1	1	1	1	1	0	985000	0	2830000	819000	3660000	2170000	908000	50888.2	39.1	186.87	25.43
		TUBB4B	HUMAN	P68371	Tubulin beta-4B chain	P68371|P68372|P04350|Q9D6F9|Q3ZCM7|M0QX14|M0QY37|M0R0X0|A0A075B724	1	2	1	0	0	1	1	0	1	2	1	0	0	1	1	0	7790000	14800000	4710000	0	0	1540000	1180000	0	50286.6	57.3	228.03	24.56
		TUBB6	HUMAN	Q9BUF5	Tubulin beta-6 chain	Q9BUF5|K7EPE5|K7EN98|K7EJZ4|K7ERA8|K7EJ64|K7EQT3|K7ESQ3	2	3	0	1	2	4	4	2	2	3	0	1	2	5	4	3	1620000	9840000	0	848000	2340000	17700000	12400000	1250000	50312.7	30.2	131.81	58
		TUFM	HUMAN	P49411	Elongation factor Tu, mitochondrial	P49411|D3YVN7|Q8BFR5|Q8BFR5-2|H3BNU3	3	6	4	2	1	6	5	2	3	7	4	2	1	6	5	2	6400000	30900000	7730000	4470000	2160000	46500000	35200000	6070000	49883	21	94.14	94.14
		TXNL1	HUMAN	O43396	Thioredoxin-like protein 1	O43396|Q8CDN6	0	0	0	0	0	1	2	1	0	0	0	0	0	1	2	1	0	0	0	0	0	10000000	3310000	821000	32650.1	11	24.07	24.07
		U2AF1	HUMAN	Q01081	Splicing factor U2AF 35 kDa subunit	Q01081|Q9D883|Q01081-2|Q8WU68|Q8WU68-2|Q8WU68-3|M0R2N4|Q01081-3|M0QYK5|K7EJM7|K7EJH3|G3UW94|Q8BGJ9|E9Q5J3|E9Q1I7|E9PUZ3|E9PXR5|E9Q5Y2|F8WH71|E9Q809|E9PWM2|E9PWX6	1	2	0	1	1	1	1	1	1	2	0	1	1	1	1	1	759000	4050000	0	2420000	583000	1810000	1580000	757000	28385.1	10.4	31.55	31.55
		U2AF2	HUMAN	P26368	Splicing factor U2AF 65 kDa subunit	P26368|P26368-2|K7ENG2|P26369|Q3KQM4	0	2	0	0	0	3	2	0	0	2	0	0	0	4	3	0	0	4930000	0	0	0	25800000	15700000	0	53842.4	11.5	51.46	51.46
		Uap1	MOUSE	Q91YN5	UDP-N-acetylhexosamine pyrophosphorylase	Q91YN5|Q3UHZ7|Q91YN5-3|Q91YN5-2|Q16222|Q16222-3|Q16222-2	0	0	0	0	0	2	1	0	0	0	0	0	0	2	1	0	0	0	0	0	0	3500000	399000	0	59064.1	8.2	20.08	20.08
		UBA1	HUMAN	P22314	Ubiquitin-like modifier-activating enzyme 1	P22314|P22314-2|Q5JRR6|P31254	2	3	0	0	1	4	5	2	2	4	0	0	1	4	5	2	2220000	8540000	0	0	743000	20200000	17500000	3860000	118931	16.1	154.91	74.87
		Uba1	MOUSE	Q02053	Ubiquitin-like modifier-activating enzyme 1	Q02053	0	0	0	0	1	2	2	0	0	0	0	0	1	3	3	0	0	0	0	0	345000	3970000	4630000	0	119005	11.9	113.29	33.25
		UBA2	HUMAN	Q9UBT2	SUMO-activating enzyme subunit 2	Q9UBT2|Q9UBT2-2|Q9Z1F9	0	0	0	0	0	1	1	0	0	0	0	0	0	1	1	0	0	0	0	0	0	2610000	212000	0	71792.9	7.1	23.64	23.64
		UBAP2L	HUMAN	Q14157-5	Isoform 5 of Ubiquitin-associated protein 2-like	Q14157-5|Q14157|F8W726|Q14157-3|Q14157-1|Q14157-4|Q80X50-5|Q80X50-4|Q80X50|Q80X50-3|Q80X50-2	0	0	0	0	1	2	2	1	0	0	0	0	1	2	2	1	0	0	0	0	7070000	50800000	10300000	8820000	116866	2.9	23.44	23.44
		UBC	HUMAN	P0CG48	Polyubiquitin-C	P0CG48|F5H041|Q96C32|P0CG47|P62979|B4DV12|P62987|P0CG50|P0CG49|E9QNP0|P62983|P62984|J3QRK5|J3QLP7|J3QK04|D3YYZ2	3	3	3	2	1	2	2	1	4	3	4	2	1	2	2	1	25100000	37600000	8160000	7580000	13600000	54900000	35000000	14400000	77037.2	4.9	36.83	36.83
		UBE2NL	HUMAN	Q5JXB2	Putative ubiquitin-conjugating enzyme E2 N-like	Q5JXB2|P61088|P61089|F8VV71|F8VSD4|F8VZ29|F8VQQ8	2	1	1	0	0	0	0	0	2	1	1	0	0	0	0	0	2540000	2810000	1490000	0	0	0	0	0	17376.7	13.7	15.05	15.05
		UGDH	HUMAN	O60701	UDP-glucose 6-dehydrogenase	O60701|O60701-2|O60701-3|O70475|D3Z3F7	0	0	0	0	0	1	2	0	0	0	0	0	0	1	2	0	0	0	0	0	0	2340000	3010000	0	55707.7	8.7	17.13	17.13
		USO1	HUMAN	O60763	General vesicular transport factor p115	O60763|F5H4X1|Q9Z1Z0|Q9Z1Z0-2|O60763-2	0	0	0	0	0	1	2	1	0	0	0	0	0	2	4	1	0	0	0	0	0	2350000	6860000	1170000	108806	4.9	25.85	25.85
		USP14	HUMAN	P54578	Ubiquitin carboxyl-terminal hydrolase 14	P54578|B7Z4N8|P54578-2|A6NJA2|Q9JMA1|E9PYI8	0	2	0	0	0	0	0	0	0	2	0	0	0	0	0	0	0	3170000	0	0	0	0	0	0	56524.5	4.8	16.74	16.74
		USP5	HUMAN	P45974	Ubiquitin carboxyl-terminal hydrolase 5	P45974|P45974-2|P56399|Q3U4W8	0	0	0	0	1	2	3	1	0	0	0	0	1	2	3	1	0	0	0	0	1440000	6790000	6050000	2390000	96697.4	6.9	43.58	43.58
		VARS	HUMAN	P26640	Valine--tRNA ligase	P26640|Q9Z1Q9|P26640-2	3	5	1	0	0	1	3	0	3	5	1	0	0	1	3	0	4870000	7590000	412000	0	0	2790000	11300000	0	141729	7.5	87.99	87.99
		VAT1	HUMAN	Q99536	Synaptic vesicle membrane protein VAT-1 homolog	Q99536|Q99536-3|Q99536-2|Q62465	0	3	0	0	0	0	0	0	0	3	0	0	0	0	0	0	0	2880000	0	0	0	0	0	0	42147.7	10.1	23.95	23.95
		VCL	HUMAN	P18206	Vinculin	P18206|P18206-2|Q64727	1	4	0	0	0	0	0	0	1	4	0	0	0	0	0	0	2470000	7230000	0	0	0	0	0	0	124368	4.1	35.54	35.54
		VDAC2	HUMAN	P45880-1	Isoform 1 of Voltage-dependent anion-selective channel protein 2	P45880-1|P45880|P45880-2|Q60930	3	4	2	1	3	7	6	3	3	4	2	1	3	8	7	3	15400000	24300000	9800000	2960000	19200000	101000000	103000000	34000000	33884.5	41.1	109.09	109.09
		VIM	HUMAN	P08670	Vimentin	P08670|B0YJC4|B0YJC5|P17661|P31001|P41219-2|P41219|G3X981|P15331-2|G5E846|P15331|P15331-3|P12036|P12036-2|P07197|E7ESP9|E7EMV2|P07196|P07197-2|Q16352|P19246|P08553|P08551|P46660|D3YZ35	3	6	3	1	4	5	5	5	3	8	3	1	4	7	7	6	11100000	86200000	8280000	6150000	8500000	87100000	87900000	14300000	53707.8	69.3	379.24	96.03
		Vim	MOUSE	P20152	Vimentin	P20152	1	4	0	1	0	1	0	0	1	5	0	1	0	1	0	0	1300000	11100000	0	1400000	0	5770000	0	0	53743.8	66	320.89	37.68
		VKORC1	HUMAN	Q9BQB6	Vitamin K epoxide reductase complex subunit 1	Q9BQB6|Q9BQB6-2|F8W9H0|Q9BQB6-3|Q9CRC0	0	0	0	0	1	1	1	0	0	0	0	0	1	1	1	0	0	0	0	0	3290000	5660000	5920000	0	18633.6	7.9	18.9	18.9
		VPS35	HUMAN	Q96QK1	Vacuolar protein sorting-associated protein 35	Q96QK1|Q9EQH3|I3L4P4|I3L4S0	1	3	0	0	0	3	2	0	1	3	0	0	0	3	2	0	965000	2590000	0	0	0	12400000	9970000	0	92504.1	7.5	53.86	53.86
		WDR1	HUMAN	O75083	WD repeat-containing protein 1	O75083|O75083-3|O88342	0	3	0	0	0	1	2	0	0	3	0	0	0	1	2	0	0	2080000	0	0	0	1490000	6350000	0	66876.9	11.2	42.4	42.4
		XPO5	HUMAN	Q9HAV4	Exportin-5	Q9HAV4|E2QRM3	0	0	0	0	1	2	2	1	0	0	0	0	1	2	2	1	0	0	0	0	653000	1160000	1800000	922000	138420	3.3	31.06	31.06
		XRCC5	HUMAN	P13010	X-ray repair cross-complementing protein 5	P13010	1	4	0	1	0	0	0	0	1	4	0	1	0	0	0	0	1290000	5240000	0	562000	0	0	0	0	83273.6	6.1	32.58	32.58
		XRCC6	HUMAN	P12956	X-ray repair cross-complementing protein 6	P12956|P12956-2|B1AHC9|F5H1I8	1	4	1	0	0	0	0	0	1	4	1	0	0	0	0	0	1570000	7360000	788000	0	0	0	0	0	70127.1	7.2	31.14	31.14
		YARS	HUMAN	P54577	Tyrosine--tRNA ligase, cytoplasmic	P54577|A2A7S7|Q91WQ3	1	4	0	0	0	0	0	0	1	4	0	0	0	0	0	0	806000	4930000	0	0	0	0	0	0	59484.7	8.5	27.25	27.25
		YWHAB	HUMAN	P31946	14-3-3 protein beta/alpha	P31946|P31946-2|Q9CQV8|Q9CQV8-2	0	1	0	0	0	0	0	0	0	1	0	0	0	0	0	0	0	765000	0	0	0	0	0	0	28196	16.2	30.16	6.53
		YWHAG	HUMAN	P61981	14-3-3 protein gamma	P61981|P61982|Q04917|P31947|P31947-2|P68510|O70456|P62258|P62258-2|P62259	1	2	0	0	1	2	1	0	1	2	0	0	1	2	1	0	3200000	1650000	0	0	3510000	2740000	400000	0	28473.3	27.9	53.51	29.88
		YWHAQ	HUMAN	P27348	14-3-3 protein theta	P27348|P68254|P68254-2	1	1	1	0	0	0	0	0	1	1	1	0	0	0	0	0	2550000	3430000	1360000	0	0	0	0	0	28049	16.3	32.81	9.18
		YWHAZ	HUMAN	P63104	14-3-3 protein zeta/delta	P63104|P63101|P63104-2|B0AZS6|B7Z2E6	1	3	2	0	0	0	0	0	1	4	2	0	0	0	0	0	4470000	9040000	4480000	0	0	0	0	0	27915.8	26.1	51.7	37.01
		ZC3HAV1	HUMAN	Q7Z2W4	Zinc finger CCCH-type antiviral protein 1	Q7Z2W4|Q7Z2W4-2|C9J6P4|Q7Z2W4-3	0	3	0	0	0	0	0	0	0	3	0	0	0	0	0	0	0	2630000	0	0	0	0	0	0	103198	5	23.06	23.06
			ACHLY	P15636	Protease 1	P15636	0	3	0	0	0	1	1	0	0	4	0	0	0	1	1	0	0	34600000	0	0	0	9250000	6450000	0	68580.4	7.6	36.99	36.99
			BOVIN	P00760	Cationic trypsin	P00760	2	5	2	2	3	2	3	1	5	9	3	6	6	4	6	2	108000000	146000000	39600000	66700000	104000000	152000000	228000000	79900000	26469.4	32.5	72.21	72.21
			STRAV	P22629	Streptavidin	P22629|Q53532|Q53533	2	2	2	2	0	0	0	0	74	136	48	50	0	0	0	0	945000000	2280000000	215000000	234000000	0	0	0	0	18833.4	21.8	43.17	43.17

## Sheet: C. Complete Matrisome
Matrisome Division	Matrisome Category	Gene Symbol	Species	UniProt accession_number	entry_name	UniProt accession_numbers	Naba-1-10x_180123194318 unique_peptides	Naba-2-10x unique_peptides	NabaC0-2-10X unique_peptides	NabaC1-1-10X unique_peptides	Naba-3-10x unique_peptides	Naba-4-10x unique_peptides	NabaSh2-4-10X unique_peptides	NabaSh3-2-10X unique_peptides	Naba-1-10x_180123194318 numSpectra	Naba-2-10x numSpectra	NabaC0-2-10X numSpectra	NabaC1-1-10X numSpectra	Naba-3-10x numSpectra	Naba-4-10x numSpectra	NabaSh2-4-10X numSpectra	NabaSh3-2-10X numSpectra	Naba-1-10x_180123194318 totalIntensity	Naba-2-10x totalIntensity	NabaC0-2-10X totalIntensity	NabaC1-1-10X totalIntensity	Naba-3-10x totalIntensity	Naba-4-10x totalIntensity	NabaSh2-4-10X totalIntensity	NabaSh3-2-10X totalIntensity	protein_mw	percentCoverage	groupNum	subgroupNum	scoreUnique
Core matrisome	ECM Glycoproteins	Emilin1	MOUSE	Q99K41	EMILIN-1	Q99K41	2	1	0	0	1	2	0	0	3	1	0	0	1	6	0	0	2370000	5440000	0	0	4660000	3740000	0	0	108895	4	385	385.1	19.5
Core matrisome	ECM Glycoproteins	Fbn1	MOUSE	A2AQ53	Fibrillin-1	A2AQ53|P35555|F6U495|P35556|E9PHW4|Q61555	7	4	0	1	8	3	0	1	8	6	0	1	14	3	0	1	31300000	26500000	0	1300000	115000000	8170000	0	264000	332890	24.3	7	7.1	637.28
Core matrisome	ECM Glycoproteins	Fbn1	MOUSE	Q61554	Fibrillin-1	Q61554	0	0	0	0	1	0	0	0	0	0	0	0	1	0	0	0	0	0	0	0	32000000	0	0	0	332858	20.4	7	7.2	520.63
Core matrisome	ECM Glycoproteins	Fga	MOUSE	E9PV24	Protein Fga	E9PV24|Q99K47	12	15	15	16	16	13	11	13	20	31	42	31	45	22	32	51	233000000	1150000000	658000000	375000000	1370000000	341000000	299000000	591000000	88169.4	41.1	23	23.1	292.69
Core matrisome	ECM Glycoproteins	FGB	HUMAN	P02675	Fibrinogen beta chain	P02675|D6REL8	0	1	0	0	0	0	0	0	0	1	0	0	0	0	0	0	0	7100000	0	0	0	0	0	0	56611.8	22.1	12	12.2	117.14
Core matrisome	ECM Glycoproteins	Fgb	MOUSE	Q8K0E8	Fibrinogen beta chain	Q8K0E8	11	16	14	15	18	11	8	15	24	37	37	30	51	25	23	34	228000000	1290000000	566000000	283000000	1870000000	276000000	228000000	556000000	55436.4	61.5	12	12.1	417.13
Core matrisome	ECM Glycoproteins	Fgg	MOUSE	Q8VCM7	Fibrinogen gamma chain	Q8VCM7|C9JC84|P02679|C9JEU5|P02679-2	10	11	9	5	13	10	5	8	14	28	21	10	44	15	9	20	552000000	1590000000	216000000	94000000	2500000000	669000000	66900000	195000000	50075.2	46.7	31	31.1	221.2
Core matrisome	ECM Glycoproteins	FN1	HUMAN	P02751	Fibronectin	P02751|P02751-3|P02751-17|P02751-5|P02751-15|P02751-7|P02751-6|P02751-8|P02751-14|P02751-9|P02751-10|P02751-11|P02751-13|P02751-4|P02751-12|P02751-16|P02751-2	15	22	10	18	26	22	8	25	20	38	15	29	52	35	11	47	158000000	630000000	73700000	202000000	904000000	412000000	41000000	407000000	266214	38.3	4	4.1	877.92
Core matrisome	ECM Glycoproteins	Fn1	MOUSE	P11276	Fibronectin	P11276	14	20	10	14	25	14	8	23	18	30	14	17	47	20	10	39	138000000	541000000	65400000	75800000	962000000	293000000	42900000	206000000	276185	36	4	4.2	842.25
Core matrisome	ECM Glycoproteins	LTBP1	HUMAN	Q14766-4	Isoform 4 of Latent-transforming growth factor beta-binding protein 1	Q14766-4|Q14766|Q14766-5|Q14766-2|E7EV71|Q14766-3|C9JD84|Q8CG19|Q8CG19-2|Q8CG19-3	2	2	0	0	3	2	0	0	2	2	0	0	4	2	0	0	5760000	9500000	0	0	27600000	7140000	0	0	195308	3.1	187	187.1	47.25
Core matrisome	ECM Glycoproteins	Postn	MOUSE	Q62009	Periostin	Q62009|Q62009-2|Q62009-3|Q62009-5|Q62009-4|Q15063|Q15063-5|B1ALD9|Q15063-3|Q15063-2|Q15063-4|Q15063-6|Q15063-7	16	12	10	13	20	16	9	22	28	15	11	21	32	30	10	55	173000000	105000000	59700000	142000000	284000000	183000000	48400000	445000000	93826.5	40.4	17	17.1	333.52
Core matrisome	ECM Glycoproteins	Tgfbi	MOUSE	P82198	Transforming growth factor-beta-induced protein ig-h3	P82198|Q15582|D6RBX4	5	9	4	6	11	6	5	4	7	13	4	6	14	7	5	4	25700000	88000000	9880000	44100000	101000000	20700000	14300000	17700000	75223.3	26.2	39	39.1	176.13
Core matrisome	ECM Glycoproteins	THBS1	HUMAN	P07996	Thrombospondin-1	P07996|P07996-2|Q80YQ1|P35441	0	4	1	3	3	0	0	1	0	4	1	3	3	0	0	1	0	16300000	1240000	3550000	13200000	0	0	551000	133374	6.4	154	154.1	53.99
Core matrisome	ECM Glycoproteins	TNC	HUMAN	P24821-4	Isoform 4 of Tenascin	P24821-4|J3QSU6|E9PC84|P24821-2|F5H7V9|P24821-6	1	2	0	3	2	2	2	3	1	2	0	3	3	3	2	3	4550000	12600000	0	4660000	21500000	20300000	2510000	10000000	236511	19.4	13	13.3	301.84
Core matrisome	ECM Glycoproteins	TNC	HUMAN	P24821-5	Isoform 5 of Tenascin	P24821-5	1	1	0	0	1	1	0	0	1	2	0	0	3	3	0	0	1210000	5720000	0	0	4780000	2340000	0	0	187173	21.3	13	13.4	252.28
Core matrisome	ECM Glycoproteins	Tnc	MOUSE	Q80YX1-2	Isoform 2 of Tenascin	Q80YX1-2|Q80YX1-3|Q80YX1-4|Q80YX1-5|Q80YX0	1	1	0	0	1	1	0	1	2	1	0	0	2	2	0	1	19000000	20700000	0	0	16500000	14200000	0	5130000	227523	21.2	13	13.1	415.15
Core matrisome	ECM Glycoproteins	Tnc	MOUSE	Q80YX1	Tenascin	Q80YX1	0	0	0	1	0	0	0	0	0	0	0	1	0	0	0	0	0	0	0	381000	0	0	0	0	237451	19.7	13	13.2	405.3
Core matrisome	ECM Glycoproteins	Vtn	MOUSE	P29788	Vitronectin	P29788	1	4	1	3	4	1	1	1	1	4	1	3	5	1	1	1	1570000	28800000	1130000	7210000	33100000	1890000	1370000	6040000	55646.8	20.7	131	131.1	63.98
Core matrisome	Collagens	Col10a1	MOUSE	Q05306	Collagen alpha-1(X) chain	Q05306	1	2	2	0	2	1	0	2	2	4	2	0	3	2	0	2	56100000	1350000000	12800000	0	187000000	108000000	0	11500000	66831.3	17.6	255	255.1	34.39
Core matrisome	Collagens	COL11A1	HUMAN	P12107-2	Isoform B of Collagen alpha-1(XI) chain	P12107-2|P12107|P12107-3|P12107-4	1	1	0	0	1	2	0	0	4	3	0	0	3	6	0	0	36300000	31100000	0	0	32000000	36700000	0	0	183046	10.6	28	28.3	105.76
Core matrisome	Collagens	Col11a1	MOUSE	Q61245	Collagen alpha-1(XI) chain	Q61245|Q61245-2	0	0	0	0	0	1	0	0	0	0	0	0	0	1	0	0	0	0	0	0	0	2480000	0	0	181656	9.7	28	28.4	103.6
Core matrisome	Collagens	COL11A2	HUMAN	P13942	Collagen alpha-2(XI) chain	P13942|P13942-3|P13942-2|P13942-5|P13942-4|P13942-7|P13942-6|Q4VXY6|P13942-8|H0YIS1	0	0	0	0	0	1	0	0	0	0	0	0	0	1	0	0	0	0	0	0	0	1460000	0	0	172586	7.5	28	28.6	46.1
Core matrisome	Collagens	Col11a2	MOUSE	Q64739	Collagen alpha-2(XI) chain	Q64739|Q64739-3|Q64739-4|Q64739-6|Q64739-5|Q64739-1|Q64739-7	0	0	0	0	1	0	0	0	0	0	0	0	1	0	0	0	0	0	0	0	644000	0	0	0	172331	6.9	28	28.7	46.04
Core matrisome	Collagens	COL12A1	HUMAN	D6RGG3	Collagen alpha-1(XII) chain	D6RGG3|Q99715|Q99715-4|Q99715-2	1	1	1	1	3	1	1	1	2	2	1	1	4	2	1	1	423000000	508000000	18200000	23900000	550000000	543000000	16000000	14200000	334394	15.3	5	5.2	377.95
Core matrisome	Collagens	Col12a1	MOUSE	Q60847	Collagen alpha-1(XII) chain	Q60847|Q60847-5|E9PX70|Q60847-2|Q60847-3|Q60847-4	16	21	11	20	26	22	14	14	21	30	11	22	38	26	15	18	372000000	1250000000	38800000	91900000	659000000	345000000	39000000	80300000	341406	30.8	5	5.1	795.6
Core matrisome	Collagens	COL16A1	HUMAN	Q07092	Collagen alpha-1(XVI) chain	Q07092|Q07092-2|Q8BLX7-2|A6NCT7	1	3	0	0	1	1	0	0	1	3	0	0	1	1	0	0	9030000	55000000	0	0	6810000	9640000	0	0	159574	10.5	144	144.1	57.27
Core matrisome	Collagens	Col16a1	MOUSE	Q8BLX7	Collagen alpha-1(XVI) chain	Q8BLX7	0	1	0	0	0	0	0	0	0	1	0	0	0	0	0	0	0	2590000	0	0	0	0	0	0	157628	7.1	144	144.2	36.96
Core matrisome	Collagens	Col18a1	MOUSE	E9QPX1	Collagen alpha-1(XVIII) chain	E9QPX1|P39061|P39061-1|P39061-2	0	2	0	0	1	2	0	0	0	2	0	0	1	3	0	0	0	44100000	0	0	19800000	49700000	0	0	183320	5.1	460	460.1	15.86
Core matrisome	Collagens	COL19A1	HUMAN	Q14993	Collagen alpha-1(XIX) chain	Q14993	2	1	0	0	0	0	0	0	2	1	0	0	0	0	0	0	57700000	4750000	0	0	0	0	0	0	116017	9.1	430	430.1	17.32
Core matrisome	Collagens	COL1A1	HUMAN	P02452	Collagen alpha-1(I) chain	P02452	4	6	1	3	3	3	2	6	6	8	1	3	4	3	4	6	482000000	637000000	6160000	39100000	267000000	65900000	15100000	65500000	139966	42.6	1	1.2	726.82
Core matrisome	Collagens	Col1a1	MOUSE	P11087	Collagen alpha-1(I) chain	P11087|P11087-2	43	36	37	33	41	40	41	31	1050	712	229	180	728	978	237	335	119000000000	133000000000	12800000000	11500000000	114000000000	132000000000	8430000000	29400000000	139057	63.7	1	1.1	1535.34
Core matrisome	Collagens	COL1A2	HUMAN	P08123	Collagen alpha-2(I) chain	P08123	3	2	1	2	1	2	0	2	6	3	2	2	2	5	0	4	421000000	1110000000	10800000	1740000	296000000	570000000	0	40100000	129825	24.9	3	3.2	289.04
Core matrisome	Collagens	Col1a2	MOUSE	Q01149	Collagen alpha-2(I) chain	Q01149	49	47	41	44	52	50	44	45	726	541	233	206	588	679	233	388	69500000000	80000000000	9600000000	9520000000	68000000000	74500000000	6030000000	23000000000	130068	70.6	3	3.1	1218.15
Core matrisome	Collagens	COL22A1	HUMAN	Q8NFW1	Collagen alpha-1(XXII) chain	Q8NFW1|Q8NFW1-2|Q8NFW1-3	1	2	0	0	1	3	0	0	1	2	0	0	1	3	0	0	1320000	49900000	0	0	41100000	67300000	0	0	162169	4.7	395	395.1	18.93
Core matrisome	Collagens	COL2A1	HUMAN	P02458	Collagen alpha-1(II) chain	P02458|P02458-1	0	1	0	0	2	1	0	1	0	2	0	0	2	1	0	1	0	27000000	0	0	18000000	2620000	0	196000	142867	15.4	1	1.4	132.31
Core matrisome	Collagens	Col2a1	MOUSE	P28481	Collagen alpha-1(II) chain	P28481|P28481-1|P28481-4|P28481-5|P28481-6|P28481-7|P28481-2	2	0	1	1	2	1	1	1	2	0	1	1	3	1	1	1	20000000	0	291000	10300000	16600000	38200000	229000	1260000	143055	19.5	1	1.3	134.66
Core matrisome	Collagens	COL3A1	HUMAN	P02461	Collagen alpha-1(III) chain	P02461|E7ENY8|P02461-2	4	6	1	2	5	7	1	2	5	8	1	2	8	8	1	2	152000000	298000000	17600000	28200000	145000000	221000000	1720000	12500000	139817	31	2	2.2	365.86
Core matrisome	Collagens	Col3a1	MOUSE	P08121	Collagen alpha-1(III) chain	P08121	54	52	49	49	57	61	55	47	631	526	292	257	481	603	247	404	57800000000	69600000000	9760000000	8360000000	52100000000	63100000000	4220000000	17600000000	140196	63.5	2	2.1	1409.19
Core matrisome	Collagens	COL4A1	HUMAN	P02462	Collagen alpha-1(IV) chain	P02462|P02462-2	1	3	2	1	2	1	0	1	1	3	2	1	2	1	0	1	15200000	28400000	20800000	6240000	19900000	20000000	0	13000000	161753	9	88	88.2	48.14
Core matrisome	Collagens	Col4a1	MOUSE	P02463	Collagen alpha-1(IV) chain	P02463	2	5	3	2	2	3	2	1	5	7	3	3	4	7	2	1	105000000	648000000	7010000	15000000	104000000	172000000	4240000	10100000	161817	11.7	88	88.1	86.79
Core matrisome	Collagens	COL4A2	HUMAN	P08572	Collagen alpha-2(IV) chain	P08572|P20849|P20849-2	1	0	0	1	0	0	1	1	1	0	0	1	0	0	1	2	10800000	0	0	2180000	0	0	7030000	16000000	168748	2.8	59	59.2	38.21
Core matrisome	Collagens	Col4a2	MOUSE	P08122	Collagen alpha-2(IV) chain	P08122	6	5	4	5	5	6	3	4	6	5	4	5	6	7	3	4	43300000	58300000	19300000	20100000	44100000	68200000	9510000	31100000	168520	7.9	59	59.1	115.32
Core matrisome	Collagens	COL4A3	HUMAN	Q01955	Collagen alpha-3(IV) chain	Q01955|Q01955-2|Q01955-3|Q01955-4|Q01955-5	1	1	0	0	0	2	0	0	2	1	0	0	0	2	0	0	145000000	1060000	0	0	0	1230000	0	0	163179	8.2	337	337.1	23.31
Core matrisome	Collagens	Col4a4	MOUSE	Q9QZR9	Collagen alpha-4(IV) chain	Q9QZR9|Q9QZR9-2	0	0	3	0	0	0	0	2	0	0	3	0	0	0	0	2	0	0	7090000	0	0	0	0	31100000	166148	5.5	412	412.1	18.23
Core matrisome	Collagens	Col5a1	MOUSE	O88207	Collagen alpha-1(V) chain	O88207|P20908	6	6	6	7	9	5	4	5	10	11	8	11	16	9	4	9	692000000	1180000000	97100000	166000000	1310000000	634000000	53500000	118000000	184358	14.7	28	28.1	229.41
Core matrisome	Collagens	COL5A2	HUMAN	P05997	Collagen alpha-2(V) chain	P05997	1	0	0	0	1	0	0	0	1	0	0	0	1	0	0	0	267000	0	0	0	213000	0	0	0	145878	28.6	11	11.2	328.22
Core matrisome	Collagens	Col5a2	MOUSE	Q3U962	Collagen alpha-2(V) chain	Q3U962	9	9	7	6	9	8	4	7	12	12	10	9	15	14	6	11	366000000	484000000	52100000	42500000	549000000	510000000	26600000	149000000	146043	42.4	11	11.1	510.6
Core matrisome	Collagens	COL5A3	HUMAN	P25940	Collagen alpha-3(V) chain	P25940	0	0	0	0	0	1	1	0	0	0	0	0	0	1	1	0	0	0	0	0	0	503000	293000	0	172802	6.3	28	28.5	62.44
Core matrisome	Collagens	Col5a3	MOUSE	Q9JLI2	Collagen type V alpha 3 chain	Q9JLI2	7	5	5	6	4	6	2	5	9	6	5	6	5	7	2	10	102000000	93200000	17500000	26800000	63500000	59900000	6780000	37500000	172707	13.5	28	28.2	182.35
Core matrisome	Collagens	COL6A1	HUMAN	P12109	Collagen alpha-1(VI) chain	P12109	0	1	0	0	2	1	0	0	0	2	0	0	3	1	0	0	0	1760000	0	0	2670000	447000	0	0	109668	8.1	21	21.2	61.7
Core matrisome	Collagens	Col6a1	MOUSE	Q04857	Collagen alpha-1(VI) chain	Q04857	12	14	8	14	13	8	4	9	14	18	11	22	15	9	5	13	95800000	246000000	32700000	141000000	179000000	39600000	14000000	50400000	109629	30.2	21	21.1	300.66
Core matrisome	Collagens	COL6A2	HUMAN	P12110	Collagen alpha-2(VI) chain	P12110|P12110-2|P12110-3	0	1	0	1	4	1	0	0	0	1	0	1	5	1	0	0	0	6610000	0	2130000	22800000	2170000	0	0	109776	16.5	26	26.2	133.31
Core matrisome	Collagens	Col6a2	MOUSE	Q02788	Collagen alpha-2(VI) chain	Q02788|D3Z7D5	6	10	0	11	6	6	2	2	13	17	0	13	13	9	2	3	69500000	206000000	0	104000000	133000000	47200000	3480000	14700000	111473	25	26	26.1	230.3
Core matrisome	Collagens	COL6A3	HUMAN	P12111	Collagen alpha-3(VI) chain	P12111|E7ENL6|P12111-2|P12111-4|P12111-5|P12111-3	0	4	0	2	5	3	0	0	0	4	0	2	6	3	0	0	0	14000000	0	1260000	21300000	6780000	0	0	345375	8.5	6	6.3	268.79
Core matrisome	Collagens	Col6a3	MOUSE	E9PWQ3	Protein Col6a3	E9PWQ3	2	3	0	1	3	1	0	0	2	4	0	1	3	1	0	0	1050000	15600000	0	1220000	12000000	4340000	0	0	355523	24.9	6	6.1	770.2
Core matrisome	Collagens	Col6a3	MOUSE	J3QQ16	Protein Col6a3	J3QQ16	1	1	1	2	1	1	1	1	3	2	3	4	2	3	3	4	66500000	91200000	21100000	34000000	62500000	59400000	15200000	22100000	290174	27.8	6	6.2	739.71
Core matrisome	Collagens	Col7a1	MOUSE	Q63870	Collagen alpha-1(VII) chain	Q63870	0	0	1	1	0	0	1	1	0	0	1	1	0	0	2	1	0	0	1580000	1070000	0	0	1390000	4400000	296254	0.7	11	11.3	19.01
Core matrisome	Proteoglycans	BGN	HUMAN	P21810	Biglycan	P21810|P28653	1	3	0	0	3	0	0	0	1	4	0	0	3	0	0	0	696000	6340000	0	0	3420000	0	0	0	42052.7	12.7	200	200.1	45.17
Matrisome-associated	ECM Regulators	F2	MOUSE	P19221	Prothrombin	P19221|H7BX99|P00734|E9PIT3	0	2	0	0	2	0	0	0	0	2	0	0	2	0	0	0	0	1140000	0	0	6320000	0	0	0	71693.8	3.8	349	349.1	21.99
Matrisome-associated	ECM Regulators	Itih4	MOUSE	A6X935	Inter alpha-trypsin inhibitor, heavy chain 4	A6X935|E9PVD2|E9Q5L2|A6X935-2	0	1	2	3	1	0	0	0	0	1	2	3	1	0	0	0	0	3740000	1420000	3580000	4660000	0	0	0	104829	4.8	260	260.1	33.67
Matrisome-associated	ECM Regulators	Plg	MOUSE	P20918	Plasminogen	P20918	6	9	2	2	12	6	2	1	6	11	2	2	18	6	2	1	24700000	166000000	45000000	5460000	301000000	34600000	4210000	1620000	93544.9	30.5	32	32.1	214.89
Matrisome-associated	ECM Regulators	Serping1	MOUSE	P97290	Plasma protease C1 inhibitor	P97290|A2ATR8	0	0	1	3	0	0	0	0	0	0	1	3	0	0	0	0	0	0	1050000	4710000	0	0	0	0	55868.8	5.9	340	340.1	22.94
Matrisome-associated	ECM Regulators	SERPINH1	HUMAN	P50454	Serpin H1	P50454|E9PPV6|E9PKH2	0	1	0	0	1	0	0	0	0	1	0	0	1	0	0	0	0	2000000	0	0	1410000	0	0	0	46553.8	14.3	192	192.1	45.94
Matrisome-associated	ECM Regulators	Serpinh1	MOUSE	P19324	Serpin H1	P19324	0	1	0	0	1	0	0	0	0	1	0	0	1	0	0	0	0	3870000	0	0	2800000	0	0	0	46646.9	14.3	192	192.2	44.96
Matrisome-associated	ECM Regulators	Tgm2	MOUSE	P21981	Protein-glutamine gamma-glutamyltransferase 2	P21981|G3UXE8|P21980	3	6	2	6	5	2	2	1	4	7	2	6	6	3	2	1	15000000	43600000	2400000	12900000	26400000	14400000	1870000	304000	78200.7	16.3	86	86.1	89.38
Matrisome-associated	ECM Regulators	TIMP1	HUMAN	P01033	Metalloproteinase inhibitor 1	P01033|Q5H9B5|Q5H9A7	0	0	1	2	1	0	0	0	0	0	1	2	1	0	0	0	0	0	412000	5110000	6720000	0	0	0	23855.1	13	332	332.1	23.78
Matrisome-associated	Secreted Factors	S100A11	HUMAN	P31949	Protein S100-A11	P31949|P50543	0	0	0	0	2	0	0	0	0	0	0	0	2	0	0	0	0	0	0	0	3670000	0	0	0	11854.4	19	413	413.1	18.2
Matrisome-associated	Secreted Factors	S100a8	MOUSE	P27005	Protein S100-A8	P27005	1	1	0	0	1	1	0	0	2	3	0	0	2	1	0	0	3440000	4360000	0	0	3650000	2550000	0	0	10351.5	22.4	417	417.1	18.04
Matrisome-associated	Secreted Factors	S100a9	MOUSE	P31725	Protein S100-A9	P31725	1	1	1	3	1	1	2	2	2	2	3	6	2	2	4	7	9690000	15300000	22000000	63900000	18700000	7640000	13700000	43800000	13219.8	38	190	190.1	46.58
Matrisome-associated	ECM-affiliated Proteins	ANXA1	HUMAN	P04083	Annexin A1	P04083	1	2	1	4	2	1	1	1	1	4	3	5	3	1	2	2	13400000	122000000	26400000	53600000	90300000	22600000	19300000	19500000	38941.8	30.6	30	30.2	103.73
Matrisome-associated	ECM-affiliated Proteins	Anxa1	MOUSE	P10107	Annexin A1	P10107	4	7	4	7	11	5	4	3	4	10	5	9	13	5	4	3	19800000	139000000	15200000	41800000	151000000	31000000	8200000	10800000	39018.9	56.9	30	30.1	225.92
Matrisome-associated	ECM-affiliated Proteins	ANXA2	HUMAN	P07355	Annexin A2	P07355|A6NMY6|P07355-2|H0YMU9|H0YLV6|H0YKN4	0	0	1	2	0	0	0	0	0	0	1	2	0	0	0	0	0	0	1740000	4310000	0	0	0	0	38831.6	37.1	47	47.1	127.69
Matrisome-associated	ECM-affiliated Proteins	Anxa2	MOUSE	P07356	Annexin A2	P07356	0	0	1	1	0	0	0	0	0	0	1	1	0	0	0	0	0	0	1360000	317000	0	0	0	0	38960.8	33.6	47	47.2	120.51
Matrisome-associated	ECM-affiliated Proteins	Anxa6	MOUSE	P14824	Annexin A6	P14824|F8WIT2	0	1	0	0	2	0	0	0	0	2	0	0	2	0	0	0	0	2500000	0	0	1000000	0	0	0	76340.4	8.3	401	401.1	18.74
Matrisome-associated	ECM-affiliated Proteins	LGALS1	HUMAN	P09382	Galectin-1	P09382|F8WEI7	2	4	2	5	5	1	2	0	3	5	2	5	8	1	2	0	24000000	112000000	4710000	17600000	138000000	3560000	2720000	0	15057.8	71.8	74	74.1	100.22
Matrisome-associated	ECM-affiliated Proteins	Lgals1	MOUSE	P16045	Galectin-1	P16045	1	1	0	0	1	1	0	0	2	2	0	0	2	2	0	0	5170000	12800000	0	0	9150000	2810000	0	0	15207.9	28.1	74	74.2	36.02

## Sheet: D. Normalization and Enrichment
	NabaC0-2-10X unique_peptides	NabaC1-1-10X unique_peptides	NabaSh2-4-10X unique_peptides	NabaSh3-2-10X unique_peptides	Naba-1-10x_180123194318 unique_peptides	Naba-2-10x unique_peptides	Naba-3-10x unique_peptides	Naba-4-10x unique_peptides	NabaC0-2-10X numSpectra	NabaC1-1-10X numSpectra	NabaSh2-4-10X numSpectra	NabaSh3-2-10X numSpectra	Naba-1-10x_180123194318 numSpectra	Naba-2-10x numSpectra	Naba-3-10x numSpectra	Naba-4-10x numSpectra	NabaC0-2-10X totalIntensity	NabaC1-1-10X totalIntensity	NabaSh2-4-10X totalIntensity	NabaSh3-2-10X totalIntensity	Naba-1-10x_180123194318 totalIntensity	Naba-2-10x totalIntensity	Naba-3-10x totalIntensity	Naba-4-10x totalIntensity
All	817	1549	604	506	682	1309	1466	749	1696	2474	1360	1854	3112	3314	3595	3066	38202893000	40935983000	21454309000	75777786000	254141588000	309547277000	259357238000	279212354000
Matrisome	355	417	277	351	469	374	254	316	2712	2211	992	953	2352	2593	889	1494	34313673000	31584928000	19688452000	73238665000	251732223000	297202880000	247890477000	275658410000
% of matrisome	43.4517	26.9206	45.8609	69.3676	68.7683	28.5714	17.3261	42.1896	159.906	89.3694	72.9412	51.4024	75.5784	78.2438	24.7288	48.728	89.8196	77.1569	91.7692	96.6493	99.052	96.0121	95.5788	98.7272
Normalization factor to all and complete data set (Table 2)
	NabaC0-2-10X totalIntensity	NabaC1-1-10X totalIntensity	NabaSh2-4-10X totalIntensity	NabaSh3-2-10X totalIntensity	Naba-1-10x_180123194318 totalIntensity	Naba-2-10x totalIntensity	Naba-3-10x totalIntensity	Naba-4-10x totalIntensity
	1.22002	1	7.17732	6.36055	1.19114	1.11464	12.2142	3.6016

## Sheet: E. All collagens
Matrisome Division	Matrisome Category	Notes	Gene Symbol	Species	UniProt accession_number	entry_name	UniProt accession_numbers	Naba-1-10x_180123194318 unique_peptides	Naba-2-10x unique_peptides	NabaC0-2-10X unique_peptides	NabaC1-1-10X unique_peptides	Naba-3-10x unique_peptides	Naba-4-10x unique_peptides	NabaSh2-4-10X unique_peptides	NabaSh3-2-10X unique_peptides	Naba-1-10x_180123194318 numSpectra	Naba-2-10x numSpectra	NabaC0-2-10X numSpectra	NabaC1-1-10X numSpectra	Average spectral count (control)	Naba-3-10x numSpectra	Naba-4-10x numSpectra	NabaSh2-4-10X numSpectra	NabaSh3-2-10X numSpectra	Average spectral count (DDR1 KD)	Naba-1-10x_180123194318 totalIntensity	Naba-2-10x totalIntensity	NabaC0-2-10X totalIntensity	NabaC1-1-10X totalIntensity	Average Intensity (control)	Naba-3-10x totalIntensity	Naba-4-10x totalIntensity	NabaSh2-4-10X totalIntensity	NabaSh3-2-10X totalIntensity	Average intensity (DDR1 KD)	numColumnsProteinObserved	numSpectraProteinObserved	numPepsUnique	numPepsUniqueSubgroupSpecificCIDP	numPepsUniqueSubgroupSpecificCI
Core matrisome	Collagens		COL11A1	HUMAN	P12107-2	Isoform B of Collagen alpha-1(XI) chain	P12107-2|P12107|P12107-3|P12107-4	1	1	0	0	1	2	0	0	4	3	0	0	1.75	3	6	0	0	2.25	36300000	31100000	0	0	16850000	32000000	36700000	0	0	17175000	4	16	8	2	2
Core matrisome	Collagens		COL11A2	HUMAN	P13942	Collagen alpha-2(XI) chain	P13942|P13942-3|P13942-2|P13942-5|P13942-4|P13942-7|P13942-6|Q4VXY6|P13942-8|H0YIS1	0	0	0	0	0	1	0	0	0	0	0	0	0	0	1	0	0	0.25	0	0	0	0	0	0	1460000	0	0	365000	1	1	5	1	1
Core matrisome	Collagens	FACIT	COL12A1	HUMAN	D6RGG3	Collagen alpha-1(XII) chain	D6RGG3|Q99715|Q99715-4|Q99715-2	1	1	1	1	3	1	1	1	2	2	1	1	1.5	4	2	1	1	2	423000000	508000000	18200000	23900000	243275000	550000000	543000000	16000000	14200000	280800000	8	14	36	3	3
Core matrisome	Collagens	FACIT *	COL16A1	HUMAN	Q07092	Collagen alpha-1(XVI) chain	Q07092|Q07092-2|Q8BLX7-2|A6NCT7	1	3	0	0	1	1	0	0	1	3	0	0	1	1	1	0	0	0.5	9030000	55000000	0	0	16007500	6810000	9640000	0	0	4112500	4	6	6	3	3
Core matrisome	Collagens	FACIT	COL19A1	HUMAN	Q14993	Collagen alpha-1(XIX) chain	Q14993	2	1	0	0	0	0	0	0	2	1	0	0	0.75	0	0	0	0	0	57700000	4750000	0	0	15612500	0	0	0	0	0	2	3	3	3	3
Core matrisome	Collagens	Fibrillar Collagen	COL1A1	HUMAN	P02452	Collagen alpha-1(I) chain	P02452	4	6	1	3	3	3	2	6	6	8	1	3	4.5	4	3	4	6	4.25	482000000	637000000	6160000	39100000	291065000	267000000	65900000	15100000	65500000	103375000	8	35	51	12	10
Core matrisome	Collagens	Fibrillar Collagen	COL1A2	HUMAN	P08123	Collagen alpha-2(I) chain	P08123	3	2	1	2	1	2	0	2	6	3	2	2	3.25	2	5	0	4	2.75	421000000	1110000000	10800000	1740000	385885000	296000000	570000000	0	40100000	226525000	7	24	21	4	4
Core matrisome	Collagens	FACIT	COL22A1	HUMAN	Q8NFW1	Collagen alpha-1(XXII) chain	Q8NFW1|Q8NFW1-2|Q8NFW1-3	1	2	0	0	1	3	0	0	1	2	0	0	0.75	1	3	0	0	1	1320000	49900000	0	0	12805000	41100000	67300000	0	0	27100000	4	7	3	3	3
Core matrisome	Collagens		COL2A1	HUMAN	P02458	Collagen alpha-1(II) chain	P02458|P02458-1	0	1	0	0	2	1	0	1	0	2	0	0	0.5	2	1	0	1	1	0	27000000	0	0	6750000	18000000	2620000	0	196000	5204000	4	6	13	3	3
Core matrisome	Collagens	Fibrillar Collagen	COL3A1	HUMAN	P02461	Collagen alpha-1(III) chain	P02461|E7ENY8|P02461-2	4	6	1	2	5	7	1	2	5	8	1	2	4	8	8	1	2	4.75	152000000	298000000	17600000	28200000	123950000	145000000	221000000	1720000	12500000	95055000	8	35	30	12	11
Core matrisome	Collagens	Basement Membrane	COL4A1	HUMAN	P02462	Collagen alpha-1(IV) chain	P02462|P02462-2	1	3	2	1	2	1	0	1	1	3	2	1	1.75	2	1	0	1	1	15200000	28400000	20800000	6240000	17660000	19900000	20000000	0	13000000	13225000	7	11	6	3	4
Core matrisome	Collagens	Basement Membrane	COL4A2	HUMAN	P08572	Collagen alpha-2(IV) chain	P08572|P20849|P20849-2	1	0	0	1	0	0	1	1	1	0	0	1	0.5	0	0	1	2	0.75	10800000	0	0	2180000	3245000	0	0	7030000	16000000	5757500	4	5	4	3	2
Core matrisome	Collagens	Basement Membrane	COL4A3	HUMAN	Q01955	Collagen alpha-3(IV) chain	Q01955|Q01955-2|Q01955-3|Q01955-4|Q01955-5	1	1	0	0	0	2	0	0	2	1	0	0	0.75	0	2	0	0	0.5	145000000	1060000	0	0	36515000	0	1230000	0	0	307500	3	5	4	4	4
Core matrisome	Collagens	Fibrillar Collagen	COL5A2	HUMAN	P05997	Collagen alpha-2(V) chain	P05997	1	0	0	0	1	0	0	0	1	0	0	0	0.25	1	0	0	0	0.25	267000	0	0	0	66750	213000	0	0	0	53250	2	2	25	2	2
Core matrisome	Collagens	Fibrillar Collagen	COL5A3	HUMAN	P25940	Collagen alpha-3(V) chain	P25940	0	0	0	0	0	1	1	0	0	0	0	0	0	0	1	1	0	0.5	0	0	0	0	0	0	503000	293000	0	199000	2	2	5	3	2
Core matrisome	Collagens		COL6A1	HUMAN	P12109	Collagen alpha-1(VI) chain	P12109	0	1	0	0	2	1	0	0	0	2	0	0	0.5	3	1	0	0	1	0	1760000	0	0	440000	2670000	447000	0	0	779250	3	6	5	2	2
Core matrisome	Collagens		COL6A2	HUMAN	P12110	Collagen alpha-2(VI) chain	P12110|P12110-2|P12110-3	0	1	0	1	4	1	0	0	0	1	0	1	0.5	5	1	0	0	1.5	0	6610000	0	2130000	2185000	22800000	2170000	0	0	6242500	4	8	11	4	4
Core matrisome	Collagens		COL6A3	HUMAN	P12111	Collagen alpha-3(VI) chain	P12111|E7ENL6|P12111-2|P12111-4|P12111-5|P12111-3	0	4	0	2	5	3	0	0	0	4	0	2	1.5	6	3	0	0	2.25	0	14000000	0	1260000	3815000	21300000	6780000	0	0	7020000	4	15	21	6	6
Core matrisome	Collagens		Col10a1	MOUSE	Q05306	Collagen alpha-1(X) chain	Q05306	1	2	2	0	2	1	0	2	2	4	2	0	2	3	2	0	2	1.75	56100000	1350000000	12800000	0	354725000	187000000	108000000	0	11500000	76625000	6	15	5	5	5
Core matrisome	Collagens		Col11a1	MOUSE	Q61245	Collagen alpha-1(XI) chain	Q61245|Q61245-2	0	0	0	0	0	1	0	0	0	0	0	0	0	0	1	0	0	0.25	0	0	0	0	0	0	2480000	0	0	620000	1	1	7	1	1
Core matrisome	Collagens		Col11a2	MOUSE	Q64739	Collagen alpha-2(XI) chain	Q64739|Q64739-3|Q64739-4|Q64739-6|Q64739-5|Q64739-1|Q64739-7	0	0	0	0	1	0	0	0	0	0	0	0	0	1	0	0	0	0.25	0	0	0	0	0	644000	0	0	0	161000	1	1	5	1	1
Core matrisome	Collagens	FACIT *	Col12a1	MOUSE	Q60847	Collagen alpha-1(XII) chain	Q60847|Q60847-5|E9PX70|Q60847-2|Q60847-3|Q60847-4	16	21	11	20	26	22	14	14	21	30	11	22	21	38	26	15	18	24.25	372000000	1250000000	38800000	91900000	438175000	659000000	345000000	39000000	80300000	280825000	8	181	69	36	36
Core matrisome	Collagens	FACIT *	Col16a1	MOUSE	Q8BLX7	Collagen alpha-1(XVI) chain	Q8BLX7	0	1	0	0	0	0	0	0	0	1	0	0	0.25	0	0	0	0	0	0	2590000	0	0	647500	0	0	0	0	0	1	1	4	1	1
Core matrisome	Collagens	Basement Membrane *	Col18a1	MOUSE	E9QPX1	Collagen alpha-1(XVIII) chain	E9QPX1|P39061|P39061-1|P39061-2	0	2	0	0	1	2	0	0	0	2	0	0	0.5	1	3	0	0	1	0	44100000	0	0	11025000	19800000	49700000	0	0	17375000	3	6	3	3	3
Core matrisome	Collagens	Fibrillar Collagen	Col1a1	MOUSE	P11087	Collagen alpha-1(I) chain	P11087|P11087-2	43	36	37	33	41	40	41	31	1050	712	229	180	542.75	728	978	237	335	569.5	119000000000	133000000000	12800000000	11500000000	69075000000	114000000000	132000000000	8430000000	29400000000	70957500000	8	4449	94	55	54
Core matrisome	Collagens	Fibrillar Collagen	Col1a2	MOUSE	Q01149	Collagen alpha-2(I) chain	Q01149	49	47	41	44	52	50	44	45	726	541	233	206	426.5	588	679	233	388	472	69500000000	80000000000	9600000000	9520000000	42155000000	68000000000	74500000000	6030000000	23000000000	42882500000	8	3594	76	59	59
Core matrisome	Collagens		Col2a1	MOUSE	P28481	Collagen alpha-1(II) chain	P28481|P28481-1|P28481-4|P28481-5|P28481-6|P28481-7|P28481-2	2	0	1	1	2	1	1	1	2	0	1	1	1	3	1	1	1	1.5	20000000	0	291000	10300000	7647750	16600000	38200000	229000	1260000	14072250	7	10	14	5	5
Core matrisome	Collagens	Fibrillar Collagen	Col3a1	MOUSE	P08121	Collagen alpha-1(III) chain	P08121	54	52	49	49	57	61	55	47	631	526	292	257	426.5	481	603	247	404	433.75	57800000000	69600000000	9760000000	8360000000	36380000000	52100000000	63100000000	4220000000	17600000000	34255000000	8	3441	89	71	71
Core matrisome	Collagens	Basement Membrane *	Col4a1	MOUSE	P02463	Collagen alpha-1(IV) chain	P02463	2	5	3	2	2	3	2	1	5	7	3	3	4.5	4	7	2	1	3.5	105000000	648000000	7010000	15000000	193752500	104000000	172000000	4240000	10100000	72585000	8	32	11	8	8
Core matrisome	Collagens	Basement Membrane *	Col4a2	MOUSE	P08122	Collagen alpha-2(IV) chain	P08122	6	5	4	5	5	6	3	4	6	5	4	5	5	6	7	3	4	5	43300000	58300000	19300000	20100000	35250000	44100000	68200000	9510000	31100000	38227500	8	40	10	8	8
Core matrisome	Collagens	Basement Membrane *	Col4a4	MOUSE	Q9QZR9	Collagen alpha-4(IV) chain	Q9QZR9|Q9QZR9-2	0	0	3	0	0	0	0	2	0	0	3	0	0.75	0	0	0	2	0.5	0	0	7090000	0	1772500	0	0	0	31100000	7775000	2	5	3	3	3
Core matrisome	Collagens	Fibrillar Collagen	Col5a1	MOUSE	O88207	Collagen alpha-1(V) chain	O88207|P20908	6	6	6	7	9	5	4	5	10	11	8	11	10	16	9	4	9	9.5	692000000	1180000000	97100000	166000000	533775000	1310000000	634000000	53500000	118000000	528875000	8	78	16	12	12
Core matrisome	Collagens	Fibrillar Collagen	Col5a2	MOUSE	Q3U962	Collagen alpha-2(V) chain	Q3U962	9	9	7	6	9	8	4	7	12	12	10	9	10.75	15	14	6	11	11.5	366000000	484000000	52100000	42500000	236150000	549000000	510000000	26600000	149000000	308650000	8	89	36	13	13
Core matrisome	Collagens	Fibrillar Collagen	Col5a3	MOUSE	Q9JLI2	Collagen type V alpha 3 chain	Q9JLI2	7	5	5	6	4	6	2	5	9	6	5	6	6.5	5	7	2	10	6	102000000	93200000	17500000	26800000	59875000	63500000	59900000	6780000	37500000	41920000	8	50	13	11	10
Core matrisome	Collagens		Col6a1	MOUSE	Q04857	Collagen alpha-1(VI) chain	Q04857	12	14	8	14	13	8	4	9	14	18	11	22	16.25	15	9	5	13	10.5	95800000	246000000	32700000	141000000	128875000	179000000	39600000	14000000	50400000	70750000	8	107	24	21	21
Core matrisome	Collagens		Col6a2	MOUSE	Q02788	Collagen alpha-2(VI) chain	Q02788|D3Z7D5	6	10	0	11	6	6	2	2	13	17	0	13	10.75	13	9	2	3	6.75	69500000	206000000	0	104000000	94875000	133000000	47200000	3480000	14700000	49595000	7	70	19	12	12
Core matrisome	Collagens		Col6a3	MOUSE	E9PWQ3	Protein Col6a3	E9PWQ3	2	3	0	1	3	1	0	0	2	4	0	1	1.75	3	1	0	0	1	1050000	15600000	0	1220000	4467500	12000000	4340000	0	0	4085000	5	11	62	4	4
Core matrisome	Collagens		Col6a3	MOUSE	J3QQ16	Protein Col6a3	J3QQ16	1	1	1	2	1	1	1	1	3	2	3	4	3	2	3	3	4	3	66500000	91200000	21100000	34000000	53200000	62500000	59400000	15200000	22100000	39800000	8	24	59	1	2
Core matrisome	Collagens		Col7a1	MOUSE	Q63870	Collagen alpha-1(VII) chain	Q63870	0	0	1	1	0	0	1	1	0	0	1	1	0.5	0	0	2	1	0.75	0	0	1580000	1070000	662500	0	0	1390000	4400000	1447500	4	5	2	1	1

## Sheet: Collagens_Norm to All
Gene Symbol	GeneSymbol_Species	Species	Division	Category	Notes	Naba-1-10x_180123194318 unique_peptides	Naba-2-10x unique_peptides	NabaC0-2-10X unique_peptides	NabaC1-1-10X unique_peptides	Naba-3-10x unique_peptides	Naba-4-10x unique_peptides	NabaSh2-4-10X unique_peptides	NabaSh3-2-10X unique_peptides	Naba-1-10x_180123194318 numSpectra	Naba-2-10x numSpectra	NabaC0-2-10X numSpectra	NabaC1-1-10X numSpectra	Average spectral count (control)	Naba-3-10x numSpectra	Naba-4-10x numSpectra	NabaSh2-4-10X numSpectra	NabaSh3-2-10X numSpectra	Average spectral count (DDR1 KD)	Naba-1-10x_180123194318 totalIntensity	Naba-2-10x totalIntensity	NabaC0-2-10X totalIntensity	NabaC1-1-10X totalIntensity	Normalized Intensity	Normalized Intensity	Normalized Intensity	Normalized Intensity	Average Normalized Intensity (shCTRL)	Naba-3-10x totalIntensity	Naba-4-10x totalIntensity	NabaSh2-4-10X totalIntensity	NabaSh3-2-10X totalIntensity	Normalized Intensity	Normalized Intensity	Normalized Intensity	Normalized Intensity	Average Normalized intensity (shDDR1)	Ratio (shDDR1 /shCTRL)
COL11A1	COL11A1_HUMAN	HUMAN	Core matrisome	Collagens		1	1	0	0	1	2	0	0	4	3	0	0	1.75	3	6	0	0	2.25	36300000	31100000	0	0	4.42868e+07	31100000	0	0	1.88467e+07	32000000	36700000	0	0	3.81164e+07	4.09072e+07	0	0	1.97559e+07	1.04824
COL11A2	COL11A2_HUMAN	HUMAN	Core matrisome	Collagens		0	0	0	0	0	1	0	0	0	0	0	0	0	0	1	0	0	0.25	0	0	0	0	0	0	0	0	0	0	1460000	0	0	0	1.62737e+06	0	0	406842	#DIV/0!
COL12A1	COL12A1_HUMAN	HUMAN	Core matrisome	Collagens	FACIT	1	1	1	1	3	1	1	1	2	2	1	1	1.5	4	2	1	1	2	423000000	508000000	18200000	23900000	5.16069e+08	508000000	1.30627e+08	1.52017e+08	3.26678e+08	550000000	543000000	16000000	14200000	6.55126e+08	6.05248e+08	1.95427e+08	5.11427e+07	3.76736e+08	1.15323
COL16A1	COL16A1_HUMAN	HUMAN	Core matrisome	Collagens	FACIT *	1	3	0	0	1	1	0	0	1	3	0	0	1	1	1	0	0	0.5	9030000	55000000	0	0	1.10168e+07	55000000	0	0	1.65042e+07	6810000	9640000	0	0	8.11165e+06	1.07451e+07	0	0	4.71419e+06	0.285636
COL19A1	COL19A1_HUMAN	HUMAN	Core matrisome	Collagens	FACIT	2	1	0	0	0	0	0	0	2	1	0	0	0.75	0	0	0	0	0	57700000	4750000	0	0	7.03952e+07	4750000	0	0	1.87863e+07	0	0	0	0	0	0	0	0	0	0
COL1A1	COL1A1_HUMAN	HUMAN	Core matrisome	Collagens	Fibrillar Collagen	4	6	1	3	3	3	2	6	6	8	1	3	4.5	4	3	4	6	4.25	482000000	637000000	6160000	39100000	5.8805e+08	637000000	4.42123e+07	2.48698e+08	3.7949e+08	267000000	65900000	15100000	65500000	3.18034e+08	7.34545e+07	1.84434e+08	2.35905e+08	2.02957e+08	0.534814
COL1A2	COL1A2_HUMAN	HUMAN	Core matrisome	Collagens	Fibrillar Collagen	3	2	1	2	1	2	0	2	6	3	2	2	3.25	2	5	0	4	2.75	421000000	1110000000	10800000	1740000	5.13629e+08	1110000000	7.7515e+07	1.10674e+07	4.28053e+08	296000000	570000000	0	40100000	3.52577e+08	6.35343e+08	0	1.44424e+08	2.83086e+08	0.661334
COL22A1	COL22A1_HUMAN	HUMAN	Core matrisome	Collagens	FACIT	1	2	0	0	1	3	0	0	1	2	0	0	0.75	1	3	0	0	1	1320000	49900000	0	0	1.61043e+06	49900000	0	0	1.28776e+07	41100000	67300000	0	0	4.89558e+07	7.5015e+07	0	0	3.09927e+07	2.40671
COL2A1	COL2A1_HUMAN	HUMAN	Core matrisome	Collagens		0	1	0	0	2	1	0	1	0	2	0	0	0.5	2	1	0	1	1	0	27000000	0	0	0	27000000	0	0	6750000	18000000	2620000	0	196000	2.14405e+07	2.92035e+06	0	705913	6.26669e+06	0.928398
COL3A1	COL3A1_HUMAN	HUMAN	Core matrisome	Collagens	Fibrillar Collagen	4	6	1	2	5	7	1	2	5	8	1	2	4	8	8	1	2	4.75	152000000	298000000	17600000	28200000	1.85443e+08	298000000	1.26321e+08	1.79368e+08	1.97283e+08	145000000	221000000	1720000	12500000	1.72715e+08	2.46335e+08	2.10084e+07	4.502e+07	1.21269e+08	0.614698
COL4A1	COL4A1_HUMAN	HUMAN	Core matrisome	Collagens	Basement Membrane	1	3	2	1	2	1	0	1	1	3	2	1	1.75	2	1	0	1	1	15200000	28400000	20800000	6240000	1.85443e+07	28400000	1.49288e+08	3.96898e+07	5.89806e+07	19900000	20000000	0	13000000	2.37036e+07	2.22927e+07	0	4.68208e+07	2.32043e+07	0.393422
COL4A2	COL4A2_HUMAN	HUMAN	Core matrisome	Collagens	Basement Membrane	1	0	0	1	0	0	1	1	1	0	0	1	0.5	0	0	1	2	0.75	10800000	0	0	2180000	1.31762e+07	0	0	1.3866e+07	6.76056e+06	0	0	7030000	16000000	0	0	8.58655e+07	5.76255e+07	3.58728e+07	5.30618
COL4A3	COL4A3_HUMAN	HUMAN	Core matrisome	Collagens	Basement Membrane	1	1	0	0	0	2	0	0	2	1	0	0	0.75	0	2	0	0	0.5	145000000	1060000	0	0	1.76903e+08	1060000	0	0	4.44908e+07	0	1230000	0	0	0	1.371e+06	0	0	342751	0.00770386
COL5A2	COL5A2_HUMAN	HUMAN	Core matrisome	Collagens	Fibrillar Collagen	1	0	0	0	1	0	0	0	1	0	0	0	0.25	1	0	0	0	0.25	267000	0	0	0	325746	0	0	0	81436.4	213000	0	0	0	253712	0	0	0	63428.1	0.778866
COL5A3	COL5A3_HUMAN	HUMAN	Core matrisome	Collagens	Fibrillar Collagen	0	0	0	0	0	1	1	0	0	0	0	0	0	0	1	1	0	0.5	0	0	0	0	0	0	0	0	0	0	503000	293000	0	0	560662	3.57875e+06	0	1.03485e+06	#DIV/0!
COL6A1	COL6A1_HUMAN	HUMAN	Core matrisome	Collagens		0	1	0	0	2	1	0	0	0	2	0	0	0.5	3	1	0	0	1	0	1760000	0	0	0	1760000	0	0	440000	2670000	447000	0	0	3.18034e+06	498242	0	0	919645	2.0901
COL6A2	COL6A2_HUMAN	HUMAN	Core matrisome	Collagens		0	1	0	1	4	1	0	0	0	1	0	1	0.5	5	1	0	0	1.5	0	6610000	0	2130000	0	6610000	0	1.3548e+07	5.03949e+06	22800000	2170000	0	0	2.71579e+07	2.41876e+06	0	0	7.39418e+06	1.46725
COL6A3	COL6A3_HUMAN	HUMAN	Core matrisome	Collagens		0	4	0	2	5	3	0	0	0	4	0	2	1.5	6	3	0	0	2.25	0	14000000	0	1260000	0	14000000	0	8.01429e+06	5.50357e+06	21300000	6780000	0	0	2.53712e+07	7.55723e+06	0	0	8.23212e+06	1.49578
Col10a1	Col10a1_MOUSE	MOUSE	Core matrisome	Collagens		1	2	2	0	2	1	0	2	2	4	2	0	2	3	2	0	2	1.75	56100000	1350000000	12800000	0	6.84432e+07	1350000000	9.18697e+07	0	3.77578e+08	187000000	108000000	0	11500000	2.22743e+08	1.20381e+08	0	4.14184e+07	9.61355e+07	0.254611
Col11a1	Col11a1_MOUSE	MOUSE	Core matrisome	Collagens		0	0	0	0	0	1	0	0	0	0	0	0	0	0	1	0	0	0.25	0	0	0	0	0	0	0	0	0	0	2480000	0	0	0	2.7643e+06	0	0	691075	#DIV/0!
Col11a2	Col11a2_MOUSE	MOUSE	Core matrisome	Collagens		0	0	0	0	1	0	0	0	0	0	0	0	0	1	0	0	0	0.25	0	0	0	0	0	0	0	0	0	644000	0	0	0	767093	0	0	0	191773	#DIV/0!
Col12a1	Col12a1_MOUSE	MOUSE	Core matrisome	Collagens	FACIT *	16	21	11	20	26	22	14	14	21	30	11	22	21	38	26	15	18	24.25	372000000	1250000000	38800000	91900000	4.53848e+08	1250000000	2.7848e+08	5.84535e+08	6.41716e+08	659000000	345000000	39000000	80300000	7.8496e+08	3.8455e+08	4.76352e+08	2.89208e+08	4.83767e+08	0.753866
Col16a1	Col16a1_MOUSE	MOUSE	Core matrisome	Collagens	FACIT *	0	1	0	0	0	0	0	0	0	1	0	0	0.25	0	0	0	0	0	0	2590000	0	0	0	2590000	0	0	647500	0	0	0	0	0	0	0	0	0	0
Col18a1	Col18a1_MOUSE	MOUSE	Core matrisome	Collagens	Basement Membrane *	0	2	0	0	1	2	0	0	0	2	0	0	0.5	1	3	0	0	1	0	44100000	0	0	0	44100000	0	0	11025000	19800000	49700000	0	0	2.35845e+07	5.53974e+07	0	0	1.97455e+07	1.79097
Col1a1	Col1a1_MOUSE	MOUSE	Core matrisome	Collagens	Fibrillar Collagen	43	36	37	33	41	40	41	31	1050	712	229	180	542.75	728	978	237	335	569.5	119000000000	133000000000	12800000000	11500000000	1.45183e+11	133000000000	9.18697e+10	7.31463e+10	1.108e+11	114000000000	132000000000	8430000000	29400000000	1.3579e+11	1.47132e+11	1.02965e+11	1.05887e+11	1.22944e+11	1.1096
Col1a2	Col1a2_MOUSE	MOUSE	Core matrisome	Collagens	Fibrillar Collagen	49	47	41	44	52	50	44	45	726	541	233	206	426.5	588	679	233	388	472	69500000000	80000000000	9600000000	9520000000	8.47915e+10	80000000000	6.89023e+10	6.05524e+10	7.35615e+10	68000000000	74500000000	6030000000	23000000000	8.09974e+10	8.30404e+10	7.36514e+10	8.28367e+10	8.01315e+10	1.08931
Col2a1	Col2a1_MOUSE	MOUSE	Core matrisome	Collagens		2	0	1	1	2	1	1	1	2	0	1	1	1	3	1	1	1	1.5	20000000	0	291000	10300000	2.44004e+07	0	2.0886e+06	6.55137e+07	2.30007e+07	16600000	38200000	229000	1260000	1.97729e+07	4.25791e+07	2.79704e+06	4.53801e+06	1.74218e+07	0.757446
Col3a1	Col3a1_MOUSE	MOUSE	Core matrisome	Collagens	Fibrillar Collagen	54	52	49	49	57	61	55	47	631	526	292	257	426.5	481	603	247	404	433.75	57800000000	69600000000	9760000000	8360000000	7.05172e+10	69600000000	7.00506e+10	5.31742e+10	6.58355e+10	52100000000	63100000000	4220000000	17600000000	6.20583e+10	7.03336e+10	5.15437e+10	6.33881e+10	6.18309e+10	0.939173
Col4a1	Col4a1_MOUSE	MOUSE	Core matrisome	Collagens	Basement Membrane *	2	5	3	2	2	3	2	1	5	7	3	3	4.5	4	7	2	1	3.5	105000000	648000000	7010000	15000000	1.28102e+08	648000000	5.0313e+07	9.54083e+07	2.30456e+08	104000000	172000000	4240000	10100000	1.23878e+08	1.91717e+08	5.1788e+07	3.63761e+07	1.0094e+08	0.438001
Col4a2	Col4a2_MOUSE	MOUSE	Core matrisome	Collagens	Basement Membrane *	6	5	4	5	5	6	3	4	6	5	4	5	5	6	7	3	4	5	43300000	58300000	19300000	20100000	5.28269e+07	58300000	1.38522e+08	1.27847e+08	9.43741e+07	44100000	68200000	9510000	31100000	5.25292e+07	7.60182e+07	1.16157e+08	1.1201e+08	8.91784e+07	0.944946
Col4a4	Col4a4_MOUSE	MOUSE	Core matrisome	Collagens	Basement Membrane *	0	0	3	0	0	0	0	2	0	0	3	0	0.75	0	0	0	2	0.5	0	0	7090000	0	0	0	5.08872e+07	0	1.27218e+07	0	0	0	31100000	0	0	0	1.1201e+08	2.80024e+07	2.20114
Col5a1	Col5a1_MOUSE	MOUSE	Core matrisome	Collagens	Fibrillar Collagen	6	6	6	7	9	5	4	5	10	11	8	11	10	16	9	4	9	9.5	692000000	1180000000	97100000	166000000	8.44255e+08	1180000000	6.96918e+08	1.05585e+09	9.44256e+08	1310000000	634000000	53500000	118000000	1.56039e+09	7.06679e+08	6.53457e+08	4.24988e+08	8.36379e+08	0.885754
Col5a2	Col5a2_MOUSE	MOUSE	Core matrisome	Collagens	Fibrillar Collagen	9	9	7	6	9	8	4	7	12	12	10	9	10.75	15	14	6	11	11.5	366000000	484000000	52100000	42500000	4.46528e+08	484000000	3.73938e+08	2.70323e+08	3.93697e+08	549000000	510000000	26600000	149000000	6.53935e+08	5.68465e+08	3.24897e+08	5.36638e+08	5.20983e+08	1.32331
Col5a3	Col5a3_MOUSE	MOUSE	Core matrisome	Collagens	Fibrillar Collagen	7	5	5	6	4	6	2	5	9	6	5	6	6.5	5	7	2	10	6	102000000	93200000	17500000	26800000	1.24442e+08	93200000	1.25603e+08	1.70463e+08	1.28427e+08	63500000	59900000	6780000	37500000	7.56372e+07	6.67667e+07	8.2812e+07	1.3506e+08	9.0069e+07	0.701324
Col6a1	Col6a1_MOUSE	MOUSE	Core matrisome	Collagens		12	14	8	14	13	8	4	9	14	18	11	22	16.25	15	9	5	13	10.5	95800000	246000000	32700000	141000000	1.16878e+08	246000000	2.34698e+08	8.96838e+08	3.73604e+08	179000000	39600000	14000000	50400000	2.13214e+08	4.41396e+07	1.70998e+08	1.8152e+08	1.52468e+08	0.408101
Col6a2	Col6a2_MOUSE	MOUSE	Core matrisome	Collagens		6	10	0	11	6	6	2	2	13	17	0	13	10.75	13	9	2	3	6.75	69500000	206000000	0	104000000	8.47915e+07	206000000	0	6.61497e+08	2.38072e+08	133000000	47200000	3480000	14700000	1.58421e+08	5.26108e+07	4.25053e+07	5.29435e+07	7.66202e+07	0.321836
Col6a3	Col6a3_MOUSE	MOUSE	Core matrisome	Collagens		2	3	0	1	3	1	0	0	2	4	0	1	1.75	3	1	0	0	1	1050000	15600000	0	1220000	1.28102e+06	15600000	0	7.75987e+06	6.16022e+06	12000000	4340000	0	0	1.42937e+07	4.83752e+06	0	0	4.78279e+06	0.776399
Col6a3	Col6a3_MOUSE	MOUSE	Core matrisome	Collagens		1	1	1	2	1	1	1	1	3	2	3	4	3	2	3	3	4	3	66500000	91200000	21100000	34000000	8.11314e+07	91200000	1.51441e+08	2.16259e+08	1.35008e+08	62500000	59400000	15200000	22100000	7.44461e+07	6.62094e+07	1.85655e+08	7.95953e+07	1.01477e+08	0.751634
Col7a1	Col7a1_MOUSE	MOUSE	Core matrisome	Collagens		0	0	1	1	0	0	1	1	0	0	1	1	0.5	0	0	2	1	0.75	0	0	1580000	1070000	0	0	1.13402e+07	6.80579e+06	4.53649e+06	0	0	1390000	4400000	0	0	1.69777e+07	1.5847e+07	8.20618e+06	1.80893
