# Supplementary material for: A tumor-derived type III collagen-rich ECM niche regulates tumor cell dormancy
Source: Research Square preprint supplement (doi:10.21203/rs.3.rs-580847/v1), 2021-06-22
Supplement: Supplementary file 2 [file eea2033c4c504fe3737b7a42.xlsx]

## Sheet: THEPvsDHEP.diffTF
Gene_ID	Gene_Symbol	THEP	DHEP	log2FoldChange	Description	DBD_Classification(Protein_Group,Protein_Family)	Reviewer	Judgement	Taxa	Reviewer_Commments	PubMed_ID	Function	Species	Evidence_Strength	PubMed_Comments
ENSG00000001167	NFYA	1213.68	450.375	1.4081	nuclear transcription factor-Y alpha	Other Alpha-Helix Group/NF-Y CCAAT-Binding Protein Family	Debra Fulton	TF Gene	DNA-Binding: sequence-specific	Nfya is a transcription factor. It transactivates an hPTH promoter reporter when co-transfected with SP1 and it binds the ODF promoter (by ChIp and supershift assays) and transactivates an ODF gene reporter gene.	12070012	DNA Binding; Transactivation	Human; Other	Strong	Cotransfection of Sp1 or NF-Y with the wild-type promoter (with a proximal NF-Y response element and SP1 binding site) )into Drosophila SL2 cells results in transactivation of a hPTH promoter-reporter gene and simultaneous expression of both factors in the SL2 cells produce an additive transactivation response. Mutation of the SP1 site in the hPTH promoter reduced the expression of the reporter g…
ENSG00000007866	TEAD3	131.41	388.954	-1.5155	TEA domain family member 3	Helix-Turn-Helix Group/Homeodomain Family	Gwenael Breard	TF Gene	DNA-Binding: sequence-specific	The human transcription factor hTEF-5 contains the TEA/ATTS DNA binding domain and is related to the TEF family of transcription factors. hTEF-5 is expressed in skeletal and cardiac muscle, but the strongest expression is observed in the placenta and in placenta-derived JEG-3 choriocarcinoma cells.	9148898	DNA Binding	Human	Strong	Human TEF-5 is preferentially expressed in placenta and binds to multiple functional elements of the human chorionic somatomammotropin-B gene enhancer.
ENSG00000008441	NFIX	965.916	2239.84	-1.197	nuclear factor I/X	Unclassified Structure/Nuclear Factor I-CCAAT-binding Transcription Factor (NFI-CTF) Family	Debra Fulton	TF Gene	DNA-Binding: sequence-specific	Nfix is a transcription factor. It binds NFI-dependent promotors (by supershift assays) and transactivates reporter constructs. It is also shown to inhibit transactivation of the IBAR gene promoter in MF-3 cells.	9822643	DNA Binding; Transactivation	Human; Other	Medium	Reporter assays demonstrate that NF1/X activates the alpha 1BAR gene P2 promoter in Hep3B cells and it inhibits it in DDT1 MF-2 cells.Reporter assays indicate that NFI-X is mediated solely by the COOH-terminal region.
ENSG00000019549	SNAI2	639.967	256.658	1.2821	snail homolog 2 (Drosophila)	Zinc-coordinating Group/BetaBetaAlpha-zinc finger Family	Sarav Sundararajan	TF Gene	DNA-Binding: sequence-specific		10518215	DNA Binding	Human	Strong	Representational difference analysis after E2A stimulation identified Slug as a gene upregulated by E2A, which shares sequence homology with other Snail family transcription factors. EMSA with Slug antisera using the Slug consensus binding site showed that Slug is a DNA-binding protein.
ENSG00000020633	RUNX3	804.164	1030.96	-0.35227	runt related transcription factor 3	Other/Runt Domain Family	Debra Fulton	TF Gene	DNA-Binding: sequence-specific	RunX3 is a transcription factor. It induces transcription of CD49d promoter-luciferase gene and demonstrates a repressor activity on RUNX1 promoter-luciferase gene and its repressor effect is mitigated with the introduction of RUNX3 siRNAs.	15688019	Transactivation	Human	Medium	RUNX3 promoter specific RNase protection assays (RPA) determine that that one RUNX3 isoform is being induced during B-cell stimulation (RT-PCR). RUNX3 proximal (isoform P2) promoter activity. Stable transfection of EBV-negative Akata 31 BL cells with inducible expression plasmids containing RUNX3 cDNA (P2 isoform) demonstrate that RUNX3 represses RUNX1 promoter-luciferase gene. Western blot of RU…
ENSG00000020633	RUNX3	804.164	1030.96	-0.35227	runt related transcription factor 3	Other/Runt Domain Family	Debra Fulton	TF Gene	DNA-Binding: sequence-specific	RunX3 is a transcription factor. It induces transcription of CD49d promoter-luciferase gene and demonstrates a repressor activity on RUNX1 promoter-luciferase gene and its repressor effect is mitigated with the introduction of RUNX3 siRNAs.	16164020	DNA Binding; Transactivation	Human	Medium	Transient transfection experiments in human cell line K562 (chronic myelogenous leukemia) reveal that RUNX3 transactivates the CD49d gene proximal promoter (luciferase-reporter gene).
ENSG00000025434	NR1H3	139.776	372.082	-1.3649	nuclear receptor subfamily 1, group H, member 3	Zinc-coordinating Group/Hormone-nuclear Receptor Family	Debra Fulton	TF Gene	DNA-Binding: sequence-specific	Nr1h3 is a transcription factor. It hetero dimerizes with retinoid X receptors (RXRs) and binds the D4 motif in CYP7A promoter (by gel mobility shift assay). Nr1h3 transactivates CYP7A and DR-4 reporter genes.	9013544	DNA Binding; Transactivation	Human; Mouse; Other	Strong	Gel mobility shift assays demonstrate that mLXR-alpha and hLXR-beta with hRXR and CYP7A promoter DNA (DR-4 motif) demonstrate that LXR-RXR heterodimerizes to bind the DNA with high affinity. Cotransfection of expression plasmids for mLXR-alpha or hLXR-beta into CV-1 cells with a CYP7 reporter construct and 24(S),25-epoxycholesterol (abundant in liver) or 24(R),25-epoxycholesterol(abundant in brai…
ENSG00000028277	POU2F2	2065.88	933.543	1.1297	POU domain, class 2, transcription factor 2	Helix-Turn-Helix Group/Homeodomain Family	Rob Sladek	TF Gene	DNA-Binding: sequence-specific	POU2F2 (OTF-2, OCT2) was cloned from a BJA-B B cell lymphoblastoid cell line expression library using a probe containing multimerized copies of an octamer motif.Recombinant POU2F2, expressed in bacterial lysogens, bound in gel shift assays to a probe derived from the immunogloblin heavy chain promoter. Methylation interference footprinting demonstrated that POU2F2 interacted with bases contained …	2904653	DNA Binding	Human	Strong	POU2F2 (OTF-2, OCT2) was cloned from a BJA-B B cell lymphoblastoid cell line expression library using a probe containing multimerized copies of an octamer motif.Recombinant POU2F2, expressed in bacterial lysogens, bound in gel shift assays to a probe derived from the immunogloblin heavy chain promoter. Methylation interference footprinting demonstrated that POU2F2 interacted with bases contained …
ENSG00000042429	MED17	540.302	364.755	0.5568	mediator complex subunit 17		Shannan HoSui	TF Gene Candidate	Transcription Factor Binding: tf co-factor binding	Crsp6 appears to interact with some known transcription factors, including Sp1. However, evidence for DNA-binding and transactivation in human or mouse is lacking.	9989412	Co-activation; TF PPI	Human	Medium	The authors describe a human factor, CRSP, that is required together with the TAFIIs for transcriptional activation by Sp1. Purification of CRSP identifies a complex of approximate relative molecular mass 700,000 (Mr approx700K) that contains nine subunits, one of which is CRSP6 with Mr = 77K. Immunodepletion studies confirm that these subunits have an essential cofactor function.
ENSG00000048052	HDAC9	619.766	244.899	1.1539	histone deacetylase 9		Tim Hughes	TF Gene	Transcription Regulatory Activity: heterochromatin interaction/binding; Transcription Factor Binding: tf co-factor binding	Hdac9 encodes a histone deacetylase-like protein that is expressed in brain and muscle and that has several isoforms. FLAG-tagged Hdac9 immunoprecipitates contain both histone deacetylase activity and the muscle-related MEF2 transcription factor (PMID: 11535832). Reporter cotransfection assays show that HDAC9 represses transcription of a MEF2-responsive promoter, but not an unrelated promoter (PM…	11535832	TF PPI; Transactivation	Human	Not Selected	FLAG-tagged Hdac9 immunoprecipitates contain both histone deacetylase activity and the muscle-related MEF2 transcription factor. Reporter cotransfection assays show that HDAC9 represses transcription of a MEF2-responsive promoter, but not an unrelated promoter.
ENSG00000048052	HDAC9	619.766	244.899	1.1539	histone deacetylase 9		Tim Hughes	TF Gene	Transcription Regulatory Activity: heterochromatin interaction/binding; Transcription Factor Binding: tf co-factor binding	Hdac9 encodes a histone deacetylase-like protein that is expressed in brain and muscle and that has several isoforms. FLAG-tagged Hdac9 immunoprecipitates contain both histone deacetylase activity and the muscle-related MEF2 transcription factor (PMID: 11535832). Reporter cotransfection assays show that HDAC9 represses transcription of a MEF2-responsive promoter, but not an unrelated promoter (PM…	12242305	TF PPI; Transactivation	Human; Mouse	Not Selected	At least one of the isoforms also co-purifies with heterochromatin protein 1 (HP1), an adaptor protein that recognizes methylated lysines within histone tails and mediates transcriptional repression by recruiting histone methyltransferase, by both yeast 2-hybrid and IPs from cotransfected COS cells.
ENSG00000054598	FOXC1	73.4334	236.48	-1.6133	forkhead box C1	Winged Helix-Turn-Helix/Forkhead Domain Family	Elodie Portales-Casamar	TF Gene	DNA-Binding: sequence-specific	FOXC1 binds to the FOX binding site and is capable of transactivation.	15684392	DNA Binding; Transactivation	Human	Strong	FoxC1 binds to a consensus FOX binding site (FOXBS) in EMSA experiments.FoxC1 upregulate the transcription of a 6XFOXBS-Luc reporter construct in M2 cells.
ENSG00000054598	FOXC1	73.4334	236.48	-1.6133	forkhead box C1	Winged Helix-Turn-Helix/Forkhead Domain Family	Jared Roach	TF Gene	DNA-Binding: sequence-specific	OMIM: "Saleem et al. (2001) investigated 5 missense mutations of the FOXC1 transcription factor found in patients with Axenfeld-Rieger malformations to determine their effects on FOXC1 structure and function. ... DNA-binding experiments revealed that although the S82T and S131L mutations decreased DNA binding, the F112S and I126M mutations did not. However, the F112S and I126M mutations decreased…	17000708	DNA Binding; Transactivation	Human	Not Selected	human retinal cell culture and fish studies indicate direct regulation of FGF19 by Foxc1.
ENSG00000059378	PARP12	370.068	744.492	-0.99521	poly (ADP-ribose) polymerase family, member 12		Sarav Sundararajan	Indeterminate - There is no evidence for or against this gene's role as a TF		No direct evidence of PARP-12 being a TF, but sequence homology implies that it shares PARP activity (chromatin modification resulting from DNA damage)	15273990	DNA Binding	Human	Weak	Review describing the PARP superfamily. PARP-12 contains 3 Zinc fingers and is a member of the PARP superfamily by homology, particularly in the C-terminal catalytic domain.
ENSG00000060566	CREB3L3	1.27965	32.7624	-2.9378	cAMP responsive element binding protein 3-like 3	Zipper-Type Group/Leucine Zipper Family	Shannan HoSui	TF Gene	DNA-Binding: sequence-specific	CREB-H is a liver-enriched transcription factor that binds specifically to CRE and box-B elements. DNA binding has been demonstrated using gel mobility shift assays. CREB-H acts as a transactivator, as shown by lucerifase assay. Deletion of the putative transmembrane domain increased activation, suggesting that the transmembrane domain may be involved in modulating activity.	11353085	DNA Binding; Transactivation	Human	Strong	In the initial screening experiment with RT?PCR, the authors observed the liver-specific expression of CREB-H using 16 human tissues. To confirm this observation, they performed northern blotting analysis with the 16 human tissues. To determine whether CREB-H is a transcription activator, plasmids expressing GAL4?CREB-H fusion proteins were produced and co-transfected with a luciferase-reporter p…
ENSG00000064313	TAF2	1363.97	1069.46	0.3446	TAF2 RNA polymerase II, TATA box binding protein (TBP)-associated factor		Amy Ticoll	TF Gene	Basal Transcription Factor	Highly purified eTFIID complexes contain TAFII150 in immunopurifications from human nuclear extracts.	9774672	TF PPI	Human	Strong	Highly purified eTFIID complexes contain TAFII150 in immunopurifications from nuclear extracts of various human cell lines.
ENSG00000065970	FOXJ2	838.626	572.245	0.54277	forkhead box J2	Winged Helix-Turn-Helix/Forkhead Domain Family	Rob Sladek	TF Gene	DNA-Binding: sequence-specific	Two distinct FOXJ2 consensus binding sites (designated Type A and B) were identified in binding site selection experiments performed using bacterially expresed GST:FOXJ2 fusion proteins. FOXJ2 contacts within the Type B binding site were identified by footprinting.FOXJ2 activated transcription using reporter constructs containing either 5 copies of the Type A consensus binding site or 4 copies of…	10777590	DNA Binding	Human	Strong	Two distinct FOXJ2 consensus binding sites (designated Type A and B) were identified in binding site selection experiments performed using bacterially expresed GST:FOXJ2 fusion proteins. FOXJ2 contacts within the Type B binding site were identified by footprinting.FOXJ2 activated transcription using reporter constructs containing either 5 copies of the Type A consensus binding site or 4 copies of…
ENSG00000066117	SMARCD1	1404.69	985.518	0.50394	SWI/SNF related, matrix associated, actin dependent regulator of chromatin, subfamily d, member 1		Tim Hughes	TF Gene	Transcription Regulatory Activity: heterochromatin interaction/binding	This gene encodes a component of a protein complex believed to function in ATP-dependent chromatin-remodelling, initially described on the basis of cDNA cloning and biochemical purification of proteins with strong similarity to a yeast protein complex (SWI/SNF) with this function (PMID: 8804307). The mouse protein, overexpressed in cell culture, can mediate interactions between cardiac transcript…	8804307	Other	Human	Not Selected	cDNA cloning and biochemical purification of proteins with strong similarity to a yeast protein complex (SWI/SNF) with this function.
ENSG00000071564	TCF3	4064.08	2530.25	0.67608	transcription factor E2a	Zipper-Type Group/Helix-Loop-Helix Family	Debra Fulton	TF Gene	DNA-Binding: sequence-specific	E2A is a transcription factor. It binds E-boxes in the hSHP promoter (by ChIP and gel mobility shift assays) and transactivates an hSHP promoter reporter gene.	14627819	DNA Binding; Transactivation	Human	Strong	E2A protein: E47 transactivates the hSHP promoter in an hSHP luciferase reporter gene.ChIP and gel mobility shift assays demonstrate that E47 binds DNA E-boxes in the hSHP promoter.
ENSG00000073282	TP63	3.35647	14.112	-1.2998	transformation related protein 63		Sarav Sundararajan	TF Gene Candidate			9774969	Transactivation	Human	Strong	Luciferase assays show that p63 can transactivate p53 reporter genes using a beta-galactosidase reporter assay.
ENSG00000073614	KDM5A	1536.48	1079.1	0.50445	jumonji, AT rich interactive domain 1A (Rbp2 like)		Andrew Kwon	TF Gene	Transcription Factor Binding: tf co-factor binding	Based on the available immunoprecipitation and transfection studies, RBP2 binds to transcription factors and act as a cofactor.	15949438	TF PPI	Human	Medium	Yeast 2-hybrid assay shows that pRB interacts with RBP2, and immunostaining shows RBP2 to be localized to nucleoli, while pRB is localized to nucleoli under low serum conditions. RBP2 and pRB were coimmunoprecipitated from cell lysates, and this interaction was insensitive to EtBr and DNaseI, indicating that DNA is not involved in the interaction. ChIP using RB-/- cells indicates that RBP2 binds …
ENSG00000073614	KDM5A	1536.48	1079.1	0.50445	jumonji, AT rich interactive domain 1A (Rbp2 like)		Andrew Kwon	TF Gene	Transcription Factor Binding: tf co-factor binding	Based on the available immunoprecipitation and transfection studies, RBP2 binds to transcription factors and act as a cofactor.	9129143	Co-activation; TF PPI	Human	Medium	Yeast 2-hybrid assay shows that RBP2 and RBTN2 interact with each other, and this is further supported by coimmunoprecipitation study of in vitro RBP2 and RBTN2. Immunoprecipitation of radiolabled in vivo RBP2 and RBTN2 also shows that they interact with each other. Cotransfection of RBP2 and RBTN2 with CAT reporter construct shows that reporter expression is enhanced by presence of both RBP2 and…
ENSG00000073614	KDM5A	1536.48	1079.1	0.50445	jumonji, AT rich interactive domain 1A (Rbp2 like)		Andrew Kwon	TF Gene	Transcription Factor Binding: tf co-factor binding	Based on the available immunoprecipitation and transfection studies, RBP2 binds to transcription factors and act as a cofactor.	11358960	Co-activation; TF PPI	Human	Strong	When incubated together, RBP2 was retained with GST-ER/RAR/GR/VDR (nuclear receptors) beads but not GST or GST-YKT6 (vesicle transport) beads. Immunoblotting shows that RBP2 and ER are coimmunoprecipitated from lysates of cotransfected cells, showing they interact together. Binding assay using ER bound to ER element conjugated to agarose beads shows that RBP2 are retained together only when ER is…
ENSG00000074181	NOTCH3	4.6275	16.91	-1.3002	Notch gene homolog 3 (Drosophila)		Debra Fulton	TF Gene	Transcription Factor Binding: tf co-factor binding	Notch3 is a transcription factor. It transactivates Hes1 and Hes2 endogenous promoter-reporter genes. It also appears that its activation strength may be determined by its Ankyrin region repeats (as demonstrated by transrepression of a reporter gene).	16365048	Co-activation; Transactivation	Human; Mouse	Strong	Reporter gene assays using Hes1 and Hes5 endogenous promoters and truncated Notch3 proteins containing intracellular domains (and epitoped N terminal) in HeLa cells: (cervical carcinoma), NIH3T3 (embryonic fibroblast), C2C12 (myoblast), 293T (human embryonic kidney transformed with adenovirus 5 DNA), MK-4 (immortalized mouse kidney cells), D4T (endothelial cells), M(neuroblastoma) demonstrate tha…
ENSG00000076604	TRAF4	626.313	888.181	-0.49697	Tnf receptor associated factor 4		Debra Fulton	TF Gene	Transcription Factor Binding: tf co-factor binding	Traf4 is a transcription factor. It binds MEKK4 invivo by immunoprecipitation assays and, in complex with MEKK4, activates JNK in the 293 human cell line.	16157600	TF PPI	Human; Mouse; Other	Medium	Immunoprecipitation assays using K562 cells (that endogenously express high levels of both TRAF4 and MEKK4) demonstrates that endogenous MEKK4 was specifically coprecipitated with TRAF4 by immunoprecipitation assay. TRAF4 binds to the kinase domain of MEKK4 in 293 cells by co-immunoprecipitation domain analysis. Coexpression of TRAF4 and MEKK4 in 293 cells resulted in synergistic activation of JN…
ENSG00000076604	TRAF4	626.313	888.181	-0.49697	Tnf receptor associated factor 4		David Martin	TF Gene	Transcription Factor Binding: tf co-factor binding	MEKK4 and TRAF4 coimmunoprecipitate. Transfection assays indicate TRAF4 and MEKK4 cooperate to activate JNK.	16157600	TF PPI	Human	Medium	MEKK4 and TRAF4 coimmunoprecipitate from 293 cells.
ENSG00000077092	RARB	7.78551	37.6268	-1.8624	retinoic acid receptor, beta	Zinc-coordinating Group/Hormone-nuclear Receptor Family	Sarav Sundararajan	TF Gene	DNA-Binding: sequence-specific		2153268	DNA Binding; Transactivation	Human	Strong	DNA footprinting and EMSA experiments show that RARbeta binds to its own promoter. Luciferase constructs using deletion constructs of the RARb promoter show that this gene can transactivate its own promoter.
ENSG00000077150	NFKB2	2312.13	5471.35	-1.2276	nuclear factor of kappa light polypeptide gene enhancer in B-cells 2, p49/p100	Other/Rel Homology Region Family	Rob Sladek	TF Gene	DNA-Binding: sequence-specific	NFKB2 was cloned by using a probe derived from the human c-Rel gene to screen a human BJAB B-lymphoid leukemia library under low stringency.Bacterially expressed NFKB2 (p49) bound to the H-2Kb enhnacer NF-kappaB site in gel shift assays. The recombinant protein activated transcription from a reporter containing 4 kappaB sites following transient transfection of Jurkat cells. Synergistic activatio…	8360178	DNA Binding	Human	Strong	NFKB2 was cloned by using a probe derived from the human c-Rel gene to screen a human BJAB B-lymphoid leukemia library under low stringency.Bacterially expressed NFKB2 (p49) bound to the H-2Kb enhnacer NF-kappaB site in gel shift assays. The recombinant protein activated transcription from a reporter containing 4 kappaB sites following transient transfection of Jurkat cells. Synergistic activatio…
ENSG00000080503	SMARCA2	140.156	234.126	-0.71078	SWI/SNF related, matrix associated, actin dependent regulator of chromatin, subfamily a, member 2		Amy Ticoll	TF Gene	Transcription Factor Binding: tf co-factor binding	Human brm (Smarca2) is copurified with members of the chromatin-binding SNF2/SWI2 complex. Human brm can function as a transcriptional activator when fused to a heterologous DNA binding domain. Transfected hbrm cooperates with the glucocorticoid receptor (GR) in transcriptional activation.	8895581	TF PPI	Human	Medium	Human brm (Smarca2) is copurified with members of the chromatin-binding SNF2/SWI2 complex.
ENSG00000080503	SMARCA2	140.156	234.126	-0.71078	SWI/SNF related, matrix associated, actin dependent regulator of chromatin, subfamily a, member 2		Amy Ticoll	TF Gene	Transcription Factor Binding: tf co-factor binding	Human brm (Smarca2) is copurified with members of the chromatin-binding SNF2/SWI2 complex. Human brm can function as a transcriptional activator when fused to a heterologous DNA binding domain. Transfected hbrm cooperates with the glucocorticoid receptor (GR) in transcriptional activation.	8223438	Co-activation	Human	Weak	Human brm (Smarca2) can function as a transcriptional activator when fused to a heterologous DNA binding domain in transfection assays. Transfected hbrm cooperates with the glucocorticoid receptor (GR) in transcriptional activation.
ENSG00000080839	RBL1	726.158	557.951	0.36993	retinoblastoma-like 1 (p107)		David Martin	TF Gene Candidate	Transcription Factor Binding: tf co-factor binding	only one article providing molecular proof for a role as a TF.It looks as thought the protein is a TF-cofactor.	14716294	DNA Binding; Other	Human	Strong	DNA binding : EMSA.Repression : co-transfection / reporter gene assays.
ENSG00000081059	TCF7	7.9044	33.2614	-1.6577	transcription factor 7, T-cell specific	Other Alpha-Helix Group/High Mobility Group (Box) Family	Jared Roach	TF Gene	DNA-Binding: sequence-specific	#JR#2-15-06BLink suggsts TCF7 is human ortholog.	7579399	DNA Binding	Human	Strong	methylation interference footprinting
ENSG00000082258	CCNT2	405.513	282.945	0.50541	cyclin T2		Elodie Portales-Casamar	TF Gene	Transcription Factor Binding: tf co-factor binding	ccnt2 is one possible regulatory subunit of the complexe P-TEFb. P-TEFb contains Cdk9 and a C-type cyclin (CycT1, CycT2a, CycT2b or CycK). Cdk9 in P-TEFb phosphorylates the C-terminal domain (CTD) of RNAPII.Ccnt2 has been shown to bind directly to RNAPII and this interaction is key for its transcriptional effects.It is also part of a complexe with MyoD, involved in MyoD transcriptional activation…	15563843	Co-activation; TF PPI	Human	Strong	CycT2 activate transcription when tethered artificially to DNA upstream of the promoter (gene reporter assay in HeLa cells coexpressing pG6HIVCAT and Gal.CycT2 chimera).CycT2 only affects rates of elongation of transcription (Its effect on transcription is inhibited by PIE-1, a global inhibitor of transcription).CycT2 binds the CTD of RNAPolII in vivo (GST capture assays using Raji B cells that e…
ENSG00000083168	KAT6A	1268.98	959.705	0.39683	MYST histone acetyltransferase (monocytic leukemia) 3		Magdalena Swanson	TF Gene	Transcription Factor Binding: tf co-factor binding	Myst3 is a TF gene. Recombinant human Myst3 was shown to interact with recombinant transcription factors AML1 and PU.1 in pull-down assays. An interaction between endogenous murine Myst3 and PU.1 was shown by coimmunoprecipitation from mouse fetal liver cells. Recombinant human Myst3 enhanced PU.1-mediated transcription from a luciferase reporter construct in transient cotransfection experiments.	16702405	Co-activation; TF PPI	Human; Mouse	Strong	Human recombinant MOZ was shown to interact with transcription factors AML1 and PU.1 in pull-down assays in which 293T cells were cotransfected with HA-tagged MOZ, together with Flag-tagged human AML1 or PU.1. A reciprocal coimmunoprecipitation was shown for PU.1 and MOZ when 293T cells were cotransfected with PU.1 together with Flag-tagged MOZ. Interaction of endogenous murine PU.1 and MOZ was s…
ENSG00000083635	NUFIP1	178.544	125.569	0.48153	nuclear fragile X mental retardation protein interacting protein 1		Gwenael Breard	TF Gene Candidate	Transcription Factor Binding: tf co-factor binding	NUFIP binds to the transcription factor PTEFb and this interaction is mediated via subunit Cyclin T1. It contains a ZnFC2H2 domain. NUFIP overexpression itself increases the activity of the pol II-transcribed SV40 promoter in both 293and HeLa cells, and work synergically with Cyclin T1 to stimulates BRCA1-dependent activation in 293cells.	15107825	TF PPI	Human	Strong	Results shown that BRCA1 forms a complex with ubiquitous nuclear protein NUFIP, and NUFIP selectively binds to the transcription factor PTEFb and this interaction is mediated via subunit Cyclin T1.The Authors used a transient transfection assay. First, NUFIP overexpression itself increases the activity of the pol II-transcribed SV40 promoter in both 293and HeLa cells. Importantly, the activities …
ENSG00000083635	NUFIP1	178.544	125.569	0.48153	nuclear fragile X mental retardation protein interacting protein 1		Gwenael Breard	TF Gene Candidate	Transcription Factor Binding: tf co-factor binding	NUFIP binds to the transcription factor PTEFb and this interaction is mediated via subunit Cyclin T1. It contains a ZnFC2H2 domain. NUFIP overexpression itself increases the activity of the pol II-transcribed SV40 promoter in both 293and HeLa cells, and work synergically with Cyclin T1 to stimulates BRCA1-dependent activation in 293cells.	12941608	Other	Human	Not Selected	Authors show that NUFIP1 is associated with the nuclear matrix in perichromatin fibrils, RNA-containing structures adjacent to sites where nascent RNA is synthesized. They also show that NUFIP1 is a nucleocytoplasmic shuttling protein and contains a leucine-rich, leptomycin B-sensitive NES. The finding that in neurons NUFIP1 is also found localized in the cytoplasm in association with both endopl…
ENSG00000084093	REST	713.098	503.496	0.49529	RE1-silencing transcription factor	Zinc-coordinating Group/BetaBetaAlpha-zinc finger Family	Amy Ticoll	TF Gene	DNA-Binding: sequence-specific	EMSA and ChIP assays indicate REST/NRSF is selectively recruited to target genes. RT-PCR analysis of mRNA expression levels in U373 cells shows REST regulates the endogenous expression of several genes.	15240883	DNA Binding	Human; Rat	Strong	EMSA performed in JTC19 cells indicates several putative RE1 sequences bind REST in vitro. RE1s include those derived from P2RY4, GRIN2a, and CACNG2. ChIP assays indicate a subset of the RE1 sequences bind REST in U373 glioma cells.
ENSG00000085721	RRN3	825.047	639.243	0.36093	RRN3 RNA polymerase I transcription factor homolog (yeast)		Jared Roach	TF Gene	Transcription Factor Binding: tf co-factor binding	#JR#2-7-06OMIM:"Eukaryotic ribosomal RNA (rRNA) genes are transcribed by an enzyme solely dedicated to that purpose, RNA polymerase I (Pol I; see 602000), and their expression is coordinated with cellular growth rate. Using the protein sequence of the yeast Pol I transcription factor Rrn3, Moorefield et al. (2000) identified EST sequences which they used to isolate a partial RRN3 cDNA clone from …	10758157	Transactivation	Human; Other	Strong	The human protein functions in yeast to rescue the yeast deletion.
ENSG00000085721	RRN3	825.047	639.243	0.36093	RRN3 RNA polymerase I transcription factor homolog (yeast)		Jared Roach	TF Gene	Transcription Factor Binding: tf co-factor binding	#JR#2-7-06OMIM:"Eukaryotic ribosomal RNA (rRNA) genes are transcribed by an enzyme solely dedicated to that purpose, RNA polymerase I (Pol I; see 602000), and their expression is coordinated with cellular growth rate. Using the protein sequence of the yeast Pol I transcription factor Rrn3, Moorefield et al. (2000) identified EST sequences which they used to isolate a partial RRN3 cDNA clone from …	11250903	TF PPI	Human	Medium	The authors state: "Human RRN3 interacts directly with TAF(I)110 and TAF(I)63 of promoter-selectivity factor SL1. Blocking this connection prevents recruitment of Pol I beta to the rDNA promoter. Furthermore, hRRN3 can be found in transcriptionally autonomous Pol I holoenzyme complexes. We conclude that hRRN3 functions to recruit initiation-competent Pol I to rRNA gene promoters."
ENSG00000090097	PCBP4	844.431	682.406	0.30412	poly(rC) binding protein 4		Elodie Portales-Casamar	Not a TF - Evidence that it is not a TF		Pcbp4 belongs to a new subfamily of genes predicted to encode closely related KH-containing RNA-binding proteins with potential functions in posttranscriptional controls.	14612387	Other	Human	Unknown	Pcbp4 is restricted in the cytoplasm of HeLa cells.
ENSG00000090447	TFAP4	712.489	452.456	0.64486	transcription factor AP4	Zipper-Type Group/Helix-Loop-Helix Family	Tim Hughes	TF Gene Candidate	DNA-Binding: sequence-specific	This gene encodes AP-4, a bHLH protein that was identified as an enhancer binding factor that activates SV40 late transcription in vitro (PMID: 2833704). In vitro it binds the sequence CAGCTG by footprinting and gel-shift (PMID: 2123466).	2123466	DNA Binding	Human	Not Selected	In vitro it binds the sequence CAGCTG by footprinting and gel-shift.
ENSG00000090447	TFAP4	712.489	452.456	0.64486	transcription factor AP4	Zipper-Type Group/Helix-Loop-Helix Family	Tim Hughes	TF Gene Candidate	DNA-Binding: sequence-specific	This gene encodes AP-4, a bHLH protein that was identified as an enhancer binding factor that activates SV40 late transcription in vitro (PMID: 2833704). In vitro it binds the sequence CAGCTG by footprinting and gel-shift (PMID: 2123466).	2833704	DNA Binding; Transactivation	Human	Not Selected	A bHLH protein that was identified as an enhancer binding factor that activates SV40 late transcription in vitro.
ENSG00000090565	RAB11FIP3	874.341	1438.42	-0.70516	RAB11 family interacting protein 3 (class II)		Gwenael Breard	Not a TF - Evidence that it is not a TF		Rab11-FIP3 is a key component of complexes that control membrane traffic in cytokinesis	15601896	Other	Human	Strong	Results show that Rab11- and FIP3-containing recycling endosomes accumulate near the cleavage furrow and are required for successful completion of cytokinesis. Second, it demonstrate that the Rab11-FIP3 protein complex is intimately involved in the delivery of endosomes to the cleavage furrow.
ENSG00000090565	RAB11FIP3	874.341	1438.42	-0.70516	RAB11 family interacting protein 3 (class II)		Gwenael Breard	Not a TF - Evidence that it is not a TF		Rab11-FIP3 is a key component of complexes that control membrane traffic in cytokinesis	16148947	Other	Human	Strong	Rab11-FIP3 and FIP4 interact with Arf6 and the exocyst to control membrane traffic in cytokinesis.
ENSG00000092201	SUPT16H	4183.29	2736.76	0.6052	suppressor of Ty 16 homolog (S. cerevisiae)		Tim Hughes	TF Gene	Basal Transcription Factor	This gene encodes a protein that is a component of a complex required for RNA polymerase II to transcribe through chromatin (PMID: 10421373). It destabilizes nucleosomal structure so that one histone H2A-H2B dimer is removed during enzyme passage (PMID: 12934006). I did not read all 15 papers about this gene and it is not clear to me which of this information comes from yeast and how much comes f…	10421373	Other	Human	Not Selected	Gene encodes a protein that is a component of a complex required for RNA polymerase II to transcribe through chromatin.
ENSG00000092201	SUPT16H	4183.29	2736.76	0.6052	suppressor of Ty 16 homolog (S. cerevisiae)		Tim Hughes	TF Gene	Basal Transcription Factor	This gene encodes a protein that is a component of a complex required for RNA polymerase II to transcribe through chromatin (PMID: 10421373). It destabilizes nucleosomal structure so that one histone H2A-H2B dimer is removed during enzyme passage (PMID: 12934006). I did not read all 15 papers about this gene and it is not clear to me which of this information comes from yeast and how much comes f…	12934006	Other	Human	Not Selected	It destabilizes nucleosomal structure so that one histone H2A-H2B dimer is removed during enzyme passage.
ENSG00000092201	SUPT16H	4183.29	2736.76	0.6052	suppressor of Ty 16 homolog (S. cerevisiae)		Jared Roach	TF Gene Candidate	Transcription Regulatory Activity: heterochromatin interaction/binding	Co-immunoprecipitation studies indicate FACT (Supt16h) interacts with nucleosome components.	12934006	Non-specific DNA	Human	Medium	Co-immunoprecipitation studies indicate recombinant FACT (Supt16h) interacts with nucleosome components.
ENSG00000095564	BTAF1	1017.44	768.122	0.39643	BTAF1 RNA polymerase II, B-TFIID transcription factor-associated, (Mot1 homolog, S. cerevisiae)		Amy Ticoll	TF Gene	Basal Transcription Factor	Together Btaf1 and the TATA-binding protein (TBP) are the major components of TFIID (see PMID:14557059 for Review). The amino terminus of hTAFII170 is found to interact with hTBP through deletion mutation analysis in a yeast two-hybrid system. Results are confirmed with GST pull-down and coimmunoprecipitation assays.	11585931	TF PPI	Human	Strong	TBP-binding regions in human TAFII170 (BTAF1) are identified. The amino terminus of hTAFII170 is found to interact with hTBP through deletion mutation analysis in a yeast two-hybrid system. Results are confirmed in a similar studies with Flag-tagged hTAFII170 and GST-hTBP, as well as coimmunoprecipitation of the endogenous proteins in COS-7 cells. These and further experiments support a mechanism…
ENSG00000096401	CDC5L	2076.01	1059.37	0.9615	cell division cycle 5-like (S. pombe)		Rob Sladek	TF Evidence Conflict - There is evidence for and against this gene's role as a TF			9038199	Other	Human	Weak	Protein contains two tandem helix-turn-helix motifs similar ot myb proteins and demonstrates nuclear translocation following serum stimulation.
ENSG00000096401	CDC5L	2076.01	1059.37	0.9615	cell division cycle 5-like (S. pombe)		Debra Fulton	TF Evidence Conflict - There is evidence for and against this gene's role as a TF			11082045	DNA Binding	Human	Medium	Paper: Human Cdc5, a regulator of mitotic entry, can act as a site-specific DNA binding protein ------- Performed selection and amplification from a pool of random oligonucleotides - obtaineda consensus 12 bp sequence GATTTAACATAA - identified the nucleotides within the consensus sequence necessary for protein binding - used scanning mutagenesis to detect ?ANCA? motif, commonly found in the bindi…
ENSG00000096401	CDC5L	2076.01	1059.37	0.9615	cell division cycle 5-like (S. pombe)		Debra Fulton	TF Evidence Conflict - There is evidence for and against this gene's role as a TF			9038199	Other	Human	Weak	Paper: Pombe Cdc5-related Protein A PUTATIVE HUMAN TRANSCRIPTION FACTOR IMPLICATED IN MITOGEN-ACTIVATED SIGNALING*-------- Contains Myb-like DNA binding domain - 75% homology with the cdc5 gene product in S. pombe - has been implicated in the regulation of cell division, specifically at the G2/M transition (- Northern blot analysis of poly(A) mRNA probed with a 2.85-kb cDNA for PCDC5RP demonstrat…
ENSG00000097007	ABL1	5180.12	2766.95	0.89307	c-abl oncogene 1, receptor tyrosine kinase		Warren Cheung	Indeterminate - There is no evidence for or against this gene's role as a TF		Part of the family of non-receptor tyrosine kinases. No direct TF activity observed, but it is sufficient to activate the EGR1 promoter.	16091742	Transactivation	Human; Mouse	Weak	Activated Abl shown to be involved in transactivation of EGR1 promoter-luc. Promoter deletion constructs show the -480/-235 important. Human 293, U20S inducible lines and murine embryonic fibroblasts used.
ENSG00000100207	TCF20	1531.43	712.397	1.0837	transcription factor 20		Elodie Portales-Casamar	TF Gene	DNA-Binding: sequence-specific	tfc20 can bind to specific DNA-binding sites, part of a complex. It has been shown to transactivate various gene promoters and to activate other TF activitites.	10995766	DNA Binding; Transactivation	Human; Mouse	Medium	tcf20 (SPBP) binds as a dimer to the bipartite SPRE motif (EMSA).tcf20 is able of transactivation when fused to a GAL4-BD (gene reporter assay in HeLa cells).tcf20 enhances the transcriptional activity of various transcription factors (gene reporter assays in HeLa cells with co-expression of tcf20 with a tf and a reporter gene construct carrying a target promoter for this tf).
ENSG00000100219	XBP1	554.361	795.2	-0.50764	X-box binding protein 1	Zipper-Type Group/Leucine Zipper Family	Sarav Sundararajan	TF Gene	DNA-Binding: sequence-specific		2321018	DNA Binding; Transactivation	Human	Strong	This paper describes the cloning of the human XBP-1 gene. Gel-shift assays show that this protein can bind to the DR-alpha promoter. CAT assays using the DR-alpha promoter show that this protein can also transactivate.
ENSG00000100393	EP300	1765.67	1212.11	0.53193	E1A binding protein p300		Elodie Portales-Casamar	TF Gene	Transcription Factor Binding: tf co-factor binding	p300 is a well characterized coactivator, binding to many TF and activating transcription through its HAT activity.	12586840	Co-activation	Human	Strong	p300 and CBP synergize with CITED2 to co-activate TFAP2A (gene reporter assay with a p3xAP2-Bluc reporter in Hep3B or HepG2 cells).TFAP2A interacts physically with p300 in vivo (co-IP of overexpressed proteins in U2-OS cells).The HAT-deficient p300 mutant does not co-activate TFAP2A (gene reporter assay with a p3xAP2-Bluc reporter in Hep3B or HepG2 cells).p300D1399Y Does Not Affect TFAP2A DNA Bin…
ENSG00000100393	EP300	1765.67	1212.11	0.53193	E1A binding protein p300		Elodie Portales-Casamar	TF Gene	Transcription Factor Binding: tf co-factor binding	p300 is a well characterized coactivator, binding to many TF and activating transcription through its HAT activity.	11481322	Co-activation	Human	Strong	p300 coactivates GATA-4 transcription on natural and artificial cardiac promoters (gene reporter assays in NIH3T3 cells using constructs carrying either 6 copies of GATA-binding sites or proximal promoters of ANF or the beta -myosin heavy chain).GATA-4 and p300 Physically Interact (co-IP of overexpressed proteins in COS cells).The interacting Domain of p300 with GATA-4 Can Inhibit GATA-4 Transcri…
ENSG00000100603	SNW1	864.578	551.465	0.64011	SNW domain containing 1		Magdalena Swanson	TF Gene	Transcription Factor Binding: tf co-factor binding	Skiip is a TF gene. In reporter assays, human recombinant Skiip was found to enhance transcription mediated by recombinant vitamin D receptor (VDR), recombinant glucocorticoid receptor (GR), retinoic acid receptor (RAR), and recombinant estrogen receptor (ER) in the presence of their appropriate ligands during transient cotransfection experiments. It was shown to interact with VDR in vitro in GST…	9632709	Co-activation; TF PPI	Human	Strong	GST pull-down analysis showed an in vitro interaction of human NCoA-62 with human vitamin D receptor (VDR) when in vitro transcribed and translated 35S-labeled NCoA-62 was incubated with GST-VDR. Human recombinant NCoA-62 was found to enhance transcription mediated by VDR, glucocorticoid receptor (GR), retinoic acid receptor (RAR), and estrogen receptor (ER). COS-7 cells were transfected with vit…
ENSG00000100811	YY1	1755.23	1403.8	0.3193	YY1 transcription factor	Zinc-coordinating Group/BetaBetaAlpha-zinc finger Family	Debra Fulton	TF Gene	DNA-Binding: sequence-specific		7565750	Co-activation	Human	Medium	Paper: YY1 Facilitates the Association of Serum Response Factor with the c-fos Serum Response Element ---------EMSA used to show that YY1 binds to SRE to enhance SRF binding. Challenge binding reaction mixtures with antibodies to each protein to show that YY1 is required for the formation of the high-mobility complex formed in the presence of both proteins - they suggest that it is most likely a …
ENSG00000100811	YY1	1755.23	1403.8	0.3193	YY1 transcription factor	Zinc-coordinating Group/BetaBetaAlpha-zinc finger Family	Rob Sladek	TF Gene	DNA-Binding: sequence-specific; Transcription Regulatory Activity: heterochromatin interaction/binding		1720509	Transactivation	Human	Strong	YY1 is a transcriptional activator. Studies show that partially purified YY1 restores basal transciption level of the P5 promoter mediated by YY1-depleted HeLa and Drosophila cell extracts. reactivation is blocked by a YY1-specific antibody.
ENSG00000100811	YY1	1755.23	1403.8	0.3193	YY1 transcription factor	Zinc-coordinating Group/BetaBetaAlpha-zinc finger Family	Sarav Sundararajan	TF Gene	Basal Transcription Factor; DNA-Binding: sequence-specific; Transcription Factor Binding: tf co-factor binding; Transcription Regulatory Activity: heterochromatin interaction/binding		7501456	DNA Binding	Human	Strong	Binding site selection using oligonucleotide pools with gel shift experiments on consensus sites found in the human beta-globin promoter.
ENSG00000100811	YY1	1755.23	1403.8	0.3193	YY1 transcription factor	Zinc-coordinating Group/BetaBetaAlpha-zinc finger Family	Rob Sladek	TF Gene	DNA-Binding: sequence-specific; Transcription Regulatory Activity: heterochromatin interaction/binding		1655281	Transactivation	Human	Strong	YY1 represses transcription through the adeno-associated virus P5 promoter. YY1-GAL4DBD fusion proteins are repressors in transient transfection studies.
ENSG00000100811	YY1	1755.23	1403.8	0.3193	YY1 transcription factor	Zinc-coordinating Group/BetaBetaAlpha-zinc finger Family	Sarav Sundararajan	TF Gene	Basal Transcription Factor; DNA-Binding: sequence-specific; Transcription Factor Binding: tf co-factor binding; Transcription Regulatory Activity: heterochromatin interaction/binding		9141463	Other	Human	Strong	Review on the mechanisms of YY1-mediated activation and repression of transcription, as well as its role as an initiator element binding protein. Also gives a list of YY1 targets.
ENSG00000100811	YY1	1755.23	1403.8	0.3193	YY1 transcription factor	Zinc-coordinating Group/BetaBetaAlpha-zinc finger Family	Sarav Sundararajan	TF Gene	Basal Transcription Factor; DNA-Binding: sequence-specific; Transcription Factor Binding: tf co-factor binding; Transcription Regulatory Activity: heterochromatin interaction/binding		10452940	Other	Human	Strong	Reviews the aspects pertaining to YY1-mediated chromatin remodeling through interactions with HDAC1-3 (repression), as well as CBP and p300 (activation).
ENSG00000100823	APEX1	3871.68	3033.7	0.34877	apurinic/apyrimidinic endonuclease 1		Magdalena Swanson	TF Gene Candidate	Transcription Factor Binding: tf co-factor binding	Apex1 is a TF candidate. It interacts with transcription factors in coimmunoprecipitation studies. It also aids Jun in binding AP-1 DNA elements in EMSA studies, although Apex1 does not bind these elements itself. SDS-PAGE and Western blot analysis shows that recombinant human Ref-1 promotes recombinant human p53 tetramer formation in vitro. There is no evidence that Apex1 activates transcription…	1380454	Other	Human	Strong	EMSA shows that recombinant human Ref1 induces the binding of recombinant Jun protein or Jun extracted from HeLa nuclei to AP-1 DNA elements. This binding is decreased upon immunodepletion of either recombinant Ref1 or HeLa nuclear extracts with anti-Ref1 antibody.
ENSG00000100823	APEX1	3871.68	3033.7	0.34877	apurinic/apyrimidinic endonuclease 1		Magdalena Swanson	TF Gene Candidate	Transcription Factor Binding: tf co-factor binding	Apex1 is a TF candidate. It interacts with transcription factors in coimmunoprecipitation studies. It also aids Jun in binding AP-1 DNA elements in EMSA studies, although Apex1 does not bind these elements itself. SDS-PAGE and Western blot analysis shows that recombinant human Ref-1 promotes recombinant human p53 tetramer formation in vitro. There is no evidence that Apex1 activates transcription…	15674341	Other	Human	Medium	SDS-PAGE and Western blot analysis shows that recombinant human Ref-1 promotes recombinant human p53 tetramer formation in vitro.
ENSG00000100906	NFKBIA	563.783	1143.78	-1.0075	nuclear factor of kappa light polypeptide gene enhancer in B-cells inhibitor, alpha		Shannan HoSui	Not a TF - Evidence that it is not a TF		Human nuclear factor of kappa light chain gene enhancer in B cells inhibitor, alpha (NFKBIA) inhibits the action of NF-kappaB by forming a heterodimer with NF-kappaB, trapping it in the cytoplasm and preventing its translocation to the nucleus. NFKBIA is localized in the cytoplasm, and therefore, is unlikely to function as a transcription factor.	8717528	TF PPI	Human	Strong	A primary level of control for NF-kappa B is through interactions with an inhibitor protein called I kappa B (NFKBI). Recent evidence confirms the existence of multiple forms of I kappa B that appear to regulate NF-kappa B by distinct mechanisms. Activation of NF-kappa B to move into the nucleus is controlled by the targeted phosphorylation and subsequent degradation of I kappa B.
ENSG00000102034	ELF4	737.916	1095.9	-0.5612	E74-like factor 4 (ets domain transcription factor)	Winged Helix-Turn-Helix/Ets Domain Family	Sarav Sundararajan	TF Gene	DNA-Binding: sequence-specific		8895518	DNA Binding; Transactivation	Human	Strong	This paper describes the cloning of the human MEF gene. An oligonucleotide selection assay defined the consensus binding site for this protein. MEF was also shown to specifically bind to the human GM-CSF and IL-3 promoters and reporter assays demonstrated that this protein can transactivate these promoters.
ENSG00000102038	SMARCA1	976.815	156.417	2.582	SWI/SNF related, matrix associated, actin dependent regulator of chromatin, subfamily a, member 1		Gwenael Breard	TF Gene Candidate	Transcription Regulatory Activity: heterochromatin interaction/binding	Mammals Smarcad1 genes encode a DEAD/H box-containing proteins belonging to the SNF2 family of the helicase superfamily. Considering that the mammalian genes are part of an evolutionarily conserved family that has been implicated as global activators of transcription in yeast, Smarcad1 is a potential candidate for being a member of the SNF/SWI chromatin remodeling complex.	11031099	Other	Human	Not Selected	This DEAD/H box-containing molecule has seven highly conserved sequence regions that allow us to place it in the SNF2 family of the helicase superfamily. We have mapped the gene for hHel1 to human chromosome 4q22-q23; this region is rich in breakpoints and deletion mutants of genes involved in several human diseases, notably soft tissue leiomyosarcoma, hepatocellular carcinoma, and hematologic ma…
ENSG00000102038	SMARCA1	976.815	156.417	2.582	SWI/SNF related, matrix associated, actin dependent regulator of chromatin, subfamily a, member 1		Gwenael Breard	TF Gene Candidate	Transcription Regulatory Activity: heterochromatin interaction/binding	Mammals Smarcad1 genes encode a DEAD/H box-containing proteins belonging to the SNF2 family of the helicase superfamily. Considering that the mammalian genes are part of an evolutionarily conserved family that has been implicated as global activators of transcription in yeast, Smarcad1 is a potential candidate for being a member of the SNF/SWI chromatin remodeling complex.	1408766	DNA Binding	Human	Unknown	Authors report here sequence analysis, expression data, and functional studies for this human SNF2-like gene (hSNF2L) and its bovine homolog (bovSNF2L). Despite strong homology at the amino acid level, hSNF2L is not capable of complementing the yeast mutations snf2 or sth1 in S. cerevisiae. Furthermore, in contrast to SNF2 itself, a fusion protein consisting of the DNA binding domain of LexA and …
ENSG00000102554	KLF5	475.55	195.011	1.2526	Kruppel-like factor 5	Zinc-coordinating Group/BetaBetaAlpha-zinc finger Family	Amy Ticoll	TF Gene	DNA-Binding: sequence-specific	KLF5 is shown to bind the GT boxes of the survivin promoter in CHIP and EMSA assays. Transfection of KLF5 into a KLF5-negative cell line EU-8 enhances survivin expression.	16595680	DNA Binding	Human	Strong	KLF5 is shown to bind the GT boxes of the survivin promoter in CHIP and EMSA assays with EU-4 cells. Experiments conducted with appropriate controls.
ENSG00000103168	TAF1C	861.47	1406.53	-0.69848	TATA box binding protein (Tbp)-associated factor, RNA polymerase I, C		Amy Ticoll	TF Gene	Basal Transcription Factor	Using immunoaffinity chromatography with anti-TBP, followed by SDS-PAGE analysis, TAF1C is isolated. Antibodies against mTAFI95 (Taf1c) precipitate a protein complex containing TBP.	7801123	TF PPI	Human	Strong	Using immunoaffinity chromatography with anti-TBP, followed by SDS-PAGE analysis, TAF1C is isolated.
ENSG00000103241	FOXF1	258.41	149.612	0.7634	forkhead box F1a	Winged Helix-Turn-Helix/Forkhead Domain Family	Amy Ticoll	TF Gene	DNA-Binding: sequence-specific	In a gel shift assay with a FREAC probe and cell extracts, FREAC1 (Foxf1a) binds to the probe. DNaseI footprinting verifies that FREAC1 protein binds to predicted sites in the SPB promoter. The SPB promoter construct could be transactivated by FREAC1 in C11 cells.	8626802	DNA Binding	Human	Strong	In a gel shift assay with a FREAC probe and extracts from COS-7 cells, FREAC1 (Foxf1a) binds to the probe. DNaseI footprinting verifies that FREAC1 protein binds to predicted sites in the SPB promoter.
ENSG00000104447	TRPS1	700.312	1196.25	-0.75254	trichorhinophalangeal syndrome I (human)	Zinc-coordinating Group/GATA Domain Family	Gwenael Breard	TF Gene Candidate	DNA-Binding: sequence-specific	TRPS1 encodes a polypeptide of 1,281 amino acids. The predicted protein sequence has 2 potential nuclear localization signals (LRRRRG and RRRTRKR) and an unusual combination of different zinc finger motifs, including IKAROS-like and GATA-binding sequences.Kaiser et al. (2003) found that 2 distinct regions of the nuclear transcription factor TRPS1 can physically interact with the dynein light chai…	12761050	DNA Binding	Human	Medium	Kaiser et al. (2003) found that 2 distinct regions of the nuclear transcription factor TRPS1 can physically interact with the dynein light chain protein DNCL1. Region A covers 89 amino acids (635-723), spanning 3 potential C2H2 zinc finger structures, and region B covers the 100 most C-terminal amino acids (1182-1281) containing the IKAROS-like motif. DNCL1 colocalized with TRPS1 in dot-like stru…
ENSG00000104447	TRPS1	700.312	1196.25	-0.75254	trichorhinophalangeal syndrome I (human)	Zinc-coordinating Group/GATA Domain Family	Gwenael Breard	TF Gene Candidate	DNA-Binding: sequence-specific	TRPS1 encodes a polypeptide of 1,281 amino acids. The predicted protein sequence has 2 potential nuclear localization signals (LRRRRG and RRRTRKR) and an unusual combination of different zinc finger motifs, including IKAROS-like and GATA-binding sequences.Kaiser et al. (2003) found that 2 distinct regions of the nuclear transcription factor TRPS1 can physically interact with the dynein light chai…	11112658	Other	Human	Strong	To investigate whether trichorhinophalangeal syndrome type III is caused by TRPS1 mutations and to establish a genotype-phenotype correlation in TRPS, Ludecke et al. (2001) performed extensive mutation analysis and evaluated height and degree of brachydactyly in patients with TRPS I or TRPS III. They found 35 different mutations in 44 of 51 unrelated patients. The detection rate (86%) indicated t…
ENSG00000104447	TRPS1	700.312	1196.25	-0.75254	trichorhinophalangeal syndrome I (human)	Zinc-coordinating Group/GATA Domain Family	Gwenael Breard	TF Gene Candidate	DNA-Binding: sequence-specific	TRPS1 encodes a polypeptide of 1,281 amino acids. The predicted protein sequence has 2 potential nuclear localization signals (LRRRRG and RRRTRKR) and an unusual combination of different zinc finger motifs, including IKAROS-like and GATA-binding sequences.Kaiser et al. (2003) found that 2 distinct regions of the nuclear transcription factor TRPS1 can physically interact with the dynein light chai…	10615131	Other	Human	Weak	Momeni et al. (2000) identified 6 different nonsense mutations in the TRPS1 gene in 10 unrelated patients with TRPS I. The findings suggested that haploinsufficiency for this putative transcription factor causes TRPS I.
ENSG00000104824	HNRNPL	4852.31	3999.49	0.27579	heterogeneous nuclear ribonucleoprotein L		Amy Ticoll	TF Evidence Conflict - There is evidence for and against this gene's role as a TF	Transcription Factor Binding: tf co-factor binding	hnRNP-L and APE1 bind nCaRE-B2 in affinity column purification and EMSA. GST pull-down assay confirms an interaction between APE1 and hnRNP-L. Many experiments suggest Hnrpl plays a role in RNA splicing and stability (PMID:16455949, 12869704).	11809897	Co-activation	Human	Medium	hnRNP-L is copurified with APE1 in purification of nCaRE-B2-binding proteins on an affinity column with HeLa extracts. Binding specificity of the complex is confirmed in EMSA assays. GST pull-down assay confirms an interaction between APE1 and hnRNP-L.
ENSG00000104856	RELB	723.243	1252.72	-0.77695	avian reticuloendotheliosis viral (v-rel) oncogene related B	Other/Rel Homology Region Family	Jared Roach	TF Gene	DNA-Binding: sequence-specific; Transcription Factor Binding: tf co-factor binding	EMSA indicates RELB forms kappa-B-binding heterodimeric complexes with p50 (NFKB1) or p52 (NFKB2). This complex binds DNA at kappa-B-binding motifs and transactivates kappa B-dependent constructs in transfection studies.	8183565	Co-activation	Human	Medium	EMSA indicates RELB forms kappa-B-binding heterodimeric complexes with p50 (NFKB1) or p52 (NFKB2). This complex binds DNA at kappa-B-binding motifs.
ENSG00000105516	DBP	79.8	170.24	-1.0207	D site albumin promoter binding protein	Zipper-Type Group/Leucine Zipper Family	Sarav Sundararajan	TF Gene	DNA-Binding: sequence-specific		2331750	DNA Binding; Transactivation	Human; Rat	Strong	Dnase1 footprinting shows that DBP binds to the albumin promoter. CAT reporter and in-vitro transcription assays also show that DBP can transactivate the albumin promoter.
ENSG00000105997	HOXA3	258.118	385.383	-0.56052	homeo box A3	Helix-Turn-Helix Group/Homeodomain Family	Rob Sladek	TF Gene	DNA-Binding: sequence-specific	A consensus Hoxa3 (Hox-1.5) binding site (C(C/G)TAATX(G/T)(G/T)) was identified by binding site selection studies perfromed with the isolated His-tagged homeodomain expressed in bacteria.Transfection of a Hoxa3 expression vector into a human dermal microvascular endothelial cell line (HMEC-1) upregulates endogenous matrix metalloproteinase-14 (MMP-14) and urokinase-type plasminogen activator rece…	15914537	Transactivation	Human	Medium	Transfection of a Hoxa3 expression vector into a human dermal microvascular endothelial cell line (HMEC-1) upregulates endogenous matrix metalloproteinase-14 (MMP-14) and urokinase-type plasminogen activator receptor (uPAR) gene expression detected by Nothern blotting.
ENSG00000106829	TLE4	39.0077	443.253	-3.3232	transducin-like enhancer of split 4, homolog of Drosophila E(spl)		Jared Roach	TF Gene Candidate	Transcription Factor Binding: tf co-factor binding	#JR#2-23-06BLink to human NP_008936 TLE4OMIM: "Enhancer of split is a complex locus composed of several genetically related transcription factors implicated in cell fate decision and boundary formation. These transcription factors are divided into 2 distinct groups, both of which display genetic interactions with specific Notch (see 600275) mutations in Drosophila and humans. The first group cont…	12153506	TF PPI	Human	Medium	Moreover, we demonstrate that recombinant QD protein binds to the TLE4 Q domain and is able to abolish the TLE4/Pax5 interaction. Thus, QD could act as a negative regulator of TLE4 function, in early B-cell differentiation.
ENSG00000107175	CREB3	531.881	992.665	-0.88898	cAMP responsive element binding protein 3	Zipper-Type Group/Leucine Zipper Family	Andrew Kwon	TF Gene	Transcription Factor Binding: tf co-factor binding; DNA-Binding: sequence-specific	LZIP appears to be a transcription factor that binds to CRE motif and activates gene expression. HCF binds to LZIP as a co-factor.	9271389	DNA Binding	Human	Strong	Gal4-Luman fusion protein transfected into COS7 cells with CAT promoter having GAL4 upstream activation sequence results in strong expression. EMSA shows that Luman has high affinity for CRE sequence (tested with unlabeled CRE oligonucleotide competition). CAT reporter constructs with CRE motifs show that Luman strongly activates the reporter expression. Yeast 2-hybrid assay shows that Luman inte…
ENSG00000107175	CREB3	531.881	992.665	-0.88898	cAMP responsive element binding protein 3	Zipper-Type Group/Leucine Zipper Family	Andrew Kwon	TF Gene	Transcription Factor Binding: tf co-factor binding; DNA-Binding: sequence-specific	LZIP appears to be a transcription factor that binds to CRE motif and activates gene expression. HCF binds to LZIP as a co-factor.	9389645	TF PPI	Human	Medium	Yeast 2-hybrid assay suggests that hLZIP and HCF, but not mutant HCF, interact with each other. LZIP could be recovered from 293 whole-cell nuclear extracts by immunoprecipitation with anti-HCF Ab, but not with nonspecific Ab.
ENSG00000107175	CREB3	531.881	992.665	-0.88898	cAMP responsive element binding protein 3	Zipper-Type Group/Leucine Zipper Family	Andrew Kwon	TF Gene	Transcription Factor Binding: tf co-factor binding; DNA-Binding: sequence-specific	LZIP appears to be a transcription factor that binds to CRE motif and activates gene expression. HCF binds to LZIP as a co-factor.	10984507	Co-activation	Human	Medium	Deletion of HCF binding domain from LZIP reduces Gal4-LZIP reporter activation by half. Deletion of LxxLL motif on LZIP also significantly reduces reporter expression but is not required for association with HCF-1, as shown by yeast 2-hybrid assay.
ENSG00000107175	CREB3	531.881	992.665	-0.88898	cAMP responsive element binding protein 3	Zipper-Type Group/Leucine Zipper Family	Andrew Kwon	TF Gene	Transcription Factor Binding: tf co-factor binding; DNA-Binding: sequence-specific	LZIP appears to be a transcription factor that binds to CRE motif and activates gene expression. HCF binds to LZIP as a co-factor.	11384994	TF PPI	Human	Medium	Yeast 2-hybrid assay shows that HCLP-1 interacts with LZIP, and in vitro pull-down assay shows that HCLP-1 interacts directly with LZIP. Increasing HCLP-1 decreases activation of Gal4-LZIP reporter construct in cotransfection study.
ENSG00000107485	GATA3	123.322	17.4686	2.4399	GATA binding protein 3	Zinc-coordinating Group/GATA Domain Family	Amy Ticoll	TF Gene	DNA-Binding: sequence-specific	DNASe footprinting and gel shift assays indicate GATA-3 binds promoter regions. Cotransfection of human GATA-3 results in stimulation of HIV-1 LTR transcription.	8332492	DNA Binding	Human	Strong	DNASe footprinting assays indicate GATA-3 binding sites in the HIV-1 LTR. QT6 quail fibroblast cells used for expression of GATA-3 proteins. Gel shift assays indicate GATA-3 binds to the human T cell receptor delta gene enhancer.
ENSG00000108604	SMARCD2	1933.78	1471.74	0.39021	SWI/SNF related, matrix associated, actin dependent regulator of chromatin, subfamily d, member 2		Debra Fulton	TF Gene Candidate	Transcription Regulatory Activity: heterochromatin interaction/binding	Smarcd2 is a component of the SWI/SNF transcription factor. A SWI/SNF complex enables chromatin remodelling to facilitate subsequent transcription activation by other transcription factors.	8804307	TF PPI	Human	Strong	Baf60b is a component of SWI/SNF complexes by purification of SWI/SNF complexes from human YT cell line using a combination of chromatography and immunoaffinity purfication with antibodies.
ENSG00000108788	MLX	740.101	508.925	0.53014	MAX-like protein X	Zipper-Type Group/Helix-Loop-Helix Family	Tim Hughes	TF Gene	DNA-Binding: sequence-specific	This gene¡¯s product is also known as Mlx, for MAX-like protein X. In vitro translated Mlx dimers bind to specific E-box-like sequences by EMSA (PMID: 10918583). Mlx was also identified as being a binding partner for the carbohydrate response element binding protein (ChREBP) (PMID: 14742444). By EMSA assay performed with cotransfected cell extracts, binding of ChREBP to the carbohydrate response …	10918583	DNA Binding	Human	Not Selected	In vitro translated Mlx dimers bind to specific E-box-like sequences by EMSA.
ENSG00000108788	MLX	740.101	508.925	0.53014	MAX-like protein X	Zipper-Type Group/Helix-Loop-Helix Family	Tim Hughes	TF Gene	DNA-Binding: sequence-specific	This gene¡¯s product is also known as Mlx, for MAX-like protein X. In vitro translated Mlx dimers bind to specific E-box-like sequences by EMSA (PMID: 10918583). Mlx was also identified as being a binding partner for the carbohydrate response element binding protein (ChREBP) (PMID: 14742444). By EMSA assay performed with cotransfected cell extracts, binding of ChREBP to the carbohydrate response …	12748295	Transactivation	Human	Strong	A stably integrated LEF-1 reporter construct was upregulated when human UBF1 was transfected. This was further shown when cotransfecting UBF1 with a luciferase reporter vector driven by a 6xTCF binding site cassette. A cyclinD1 reporter construct was also activated by UBF1.
ENSG00000108813	DLX4	11.7075	32.1343	-1.1229	distal-less homeobox 4	Helix-Turn-Helix Group/Homeodomain Family	Amy Ticoll	TF Gene	DNA-Binding: sequence-specific	EMSA indicates BP1 (Dlx4) binds specifically to the BP1 binding site in silencer I. Transient transfection assays performed in K562 cells show BP1 represses the beta-globin promoter.	11909945	DNA Binding	Human	Medium	EMSA indicates both in vitro synthesized and K562 cell-extracted BP1 (Dlx4) binds specifically to the BP1 binding site in silencer I.
ENSG00000110768	GTF2H1	626.453	498.771	0.32435	general transcription factor II H, polypeptide 1		Amy Ticoll	TF Gene	Basal Transcription Factor	Immunoprecipitation and copurification indicates GTF2H1 is a member of the TFIIH complex.	15220921	TF PPI	Human	Strong	Immunoprecipitation and copurification indicates GTF2H1 is a member of the TFIIH complex. Whole cell extracts from human fibroblasts used.
ENSG00000111087	GLI1	206.115	28.5894	2.6441	GLI-Kruppel family member GLI1	Zinc-coordinating Group/BetaBetaAlpha-zinc finger Family	Rob Sladek	TF Gene	DNA-Binding: sequence-specific	GLI1 binds to putative GLI response elements in the promoters of the human cyclin D2, human IGFBP-6, human plakoglobin and rat osteopontin gene promoters in gel shift assay. The studies were performed using a truncated form of GLI1 (AA 211 to 1106) that was expressed in bacteria and affinity purified. GLI1 activates a synthetic promoter containing 12 copies of the GLI response element following t…	11719506	DNA Binding	Human	Strong	GLI1 binds to putative GLI response elements in the promoters of the human cyclin D2, human IGFBP-6, human plakoglobin and rat osteopontin gene promoters in gel shift assay. The studies were performed using a truncated form of GLI1 (AA 211 to 1106) that was expressed in bacteria and affinity purified.
ENSG00000111087	GLI1	206.115	28.5894	2.6441	GLI-Kruppel family member GLI1	Zinc-coordinating Group/BetaBetaAlpha-zinc finger Family	Rob Sladek	TF Gene	DNA-Binding: sequence-specific	GLI1 binds to putative GLI response elements in the promoters of the human cyclin D2, human IGFBP-6, human plakoglobin and rat osteopontin gene promoters in gel shift assay. The studies were performed using a truncated form of GLI1 (AA 211 to 1106) that was expressed in bacteria and affinity purified. GLI1 activates a synthetic promoter containing 12 copies of the GLI response element following t…	15087129	Transactivation	Human	Strong	GLI1 activates a reporter controlled by the human PTCH-1 gene promoter (2891 bp fragment) following transient transfection in NIH3T3 cells.
ENSG00000111087	GLI1	206.115	28.5894	2.6441	GLI-Kruppel family member GLI1	Zinc-coordinating Group/BetaBetaAlpha-zinc finger Family	Rob Sladek	TF Gene	DNA-Binding: sequence-specific	GLI1 binds to putative GLI response elements in the promoters of the human cyclin D2, human IGFBP-6, human plakoglobin and rat osteopontin gene promoters in gel shift assay. The studies were performed using a truncated form of GLI1 (AA 211 to 1106) that was expressed in bacteria and affinity purified. GLI1 activates a synthetic promoter containing 12 copies of the GLI response element following t…	10559945	DNA Binding; Transactivation	Human	Strong	GLI1 activates the PTCH1 gene promoter as well as a synthetic promoter containing 12 copies of the GLI response element following transient transfection in C3H10T1/2 cells.
ENSG00000111206	FOXM1	2772.52	1534.55	0.84035	forkhead box M1	Winged Helix-Turn-Helix/Forkhead Domain Family	David Martin	TF Gene	Transcription Regulatory Activity: heterochromatin interaction/binding; DNA-Binding: sequence-specific		9242644	DNA Binding	Human; Mouse	Strong	binding sites are determined by EMSA and SAAB techniques.
ENSG00000111424	VDR	50.1238	108.991	-1.0531	vitamin D receptor	Zinc-coordinating Group/Hormone-nuclear Receptor Family	Jaspar Database	TF Gene	DNA-Binding: sequence-specific		8674817	DNA Binding	Human	Strong	DNA binding specificity is demonstrated in selection/amplification experiments.
ENSG00000111424	VDR	50.1238	108.991	-1.0531	vitamin D receptor	Zinc-coordinating Group/Hormone-nuclear Receptor Family	Amy Ticoll	TF Gene Candidate	DNA-Binding: sequence-specific; Transcription Factor Binding: tf co-factor binding	DNase footprinting, EMSA, and ChIP studies indicate specific VDR/RXR binding regions on the 5-LO promoter. Prominent induction in transfection assays is not achieved.	16750418	Co-activation; DNA Binding	Human	Strong	DNase I footprinting analysis indicates regions with putative VDREs within the 5-LO promoter. EMSA studies show VDR/RXR binds to these sites. Results confirmed with ChIP assays in MM6 cells.
ENSG00000111912	NCOA7	329	227.273	0.5141	nuclear receptor coactivator 7		Rob Sladek	TF Gene	Transcription Factor Binding: tf co-factor binding	NCOA7 (ERAP140) was cloned from a lymphoma cDNA library by interaction screening using the ligand-binding domain of the estrogen receptor (ERalpha). Interaction between NCOA7 and a GST-ERalpha fusion protein was confirmed in pulldown assays.NCOA7 augmented ER and thyroid hormone-induced activity of suynthetic promoters following transient cotransfection in HepG2 cells. A fusion protein containing…	11971969	Co-activation	Human	Strong	NCOA7 (ERAP140) was cloned from a lymphoma cDNA library by interaction screening using the ligand-binding domain of the estrogen receptor (ERalpha). Interaction between NCOA7 and a GST-ERalpha fusion protein was confirmed in pulldown assays.NCOA7 augmented ER and thyroid hormone-induced activity of suynthetic promoters following transient cotransfection in HepG2 cells. A fusion protein containing…
ENSG00000112282	MED23	411.374	275.439	0.56371	mediator complex subunit 23		Jared Roach	TF Gene Candidate	Transcription Factor Binding: tf co-factor binding	Crsp3 is purified as a member of the human CRSP complex. CRSP is a cofactor for SP1 in an in vitro transcription assay.	9989412	TF PPI	Human	Medium	Crsp3 is purified as a member of the human CRSP complex from HeLa cell extracts. CRSP is a cofactor for SP1 in an in vitro transcription assay.
ENSG00000112658	SRF	2728.72	1484.66	0.86932	serum response factor	Other Alpha-Helix Group/MADS Box Family	Elodie Portales-Casamar	TF Gene	DNA-Binding: sequence-specific	SRF is a well-characterized TF inducing the expression of muscle-specific genes.	16170155	DNA Binding; Transactivation	Human	Strong	SRF is a component of CFTR-CArG-like binding complexes (EMSA).SRF transactivates a CArG-containing CFTR minimal promoter (gene reporeter assay in Beas2B cells).
ENSG00000113387	SUB1	1757.66	1250.22	0.48269	SUB1 homolog (S. cerevisiae)		Debra Fulton	TF Gene	Basal Transcription Factor	PC4 is a basal transcription factor. PC4-mediated activated transcription depends both on TAFs in TFIID and on TFIIH by minimal transcription reactions.	9482861	TF PPI	Human	Strong	PC4-mediated activated transcription is depends both on TAFs in TFIID and on TFIIH by minimal transcription reactions.PC4 does not interfere with minimal preinitiation complex (PIC) assembly by EMSA reactions using an an end-labeled Ad ML oligonucleotide.PC4 can be phosphorylated in the PIC in a TFIID- and TFIIH-dependent manner by invitro kinase reactions and SDS/Page.
ENSG00000113580	NR3C1	670.118	1001.76	-0.56805	nuclear receptor subfamily 3, group C, member 1	Zinc-coordinating Group/Hormone-nuclear Receptor Family	Jaspar Database	TF Gene	DNA-Binding: sequence-specific		15563547	DNA Binding	Human; Mouse; Other	Strong	One hundred and seven experimentally verified binding sites for 18 known NHRs were collected from the biomedical literature.
ENSG00000113580	NR3C1	670.118	1001.76	-0.56805	nuclear receptor subfamily 3, group C, member 1	Zinc-coordinating Group/Hormone-nuclear Receptor Family	Amy Ticoll	TF Gene	DNA-Binding: sequence-specific	Supershift assays indicates GR binds the MAOA promoter. Transfection assays in SK-N-BE(2)C show GR modulates the transcription of MAOA.	16728402	DNA Binding	Human	Strong	Supershift assays in SK-N-BE(2)C cells indicates GR binds the MAOA promoter.
ENSG00000113580	NR3C1	670.118	1001.76	-0.56805	nuclear receptor subfamily 3, group C, member 1	Zinc-coordinating Group/Hormone-nuclear Receptor Family	Amy Ticoll	TF Gene	DNA-Binding: sequence-specific	Supershift assays indicates GR binds the MAOA promoter. Transfection assays in SK-N-BE(2)C show GR modulates the transcription of MAOA.	67253380	DNA Binding	Human	Medium	Purified GR DNA-binding domain binds the promoter region of CRH in DNase footprinting assays.
ENSG00000115415	STAT1	1500.58	3067.26	-1.0192	signal transducer and activator of transcription 1	Other/Stat Protein Family	Jared Roach	TF Gene	DNA-Binding: sequence-specific	Supershift assays indicate STAT 1 binds the specific regions of the PPAR&#947;2 promoter. Stat1 activates reporter genes in transfected HepG2 cells.	10820245	Transactivation	Human	Medium	Stat1 activates reporter genes in transfected HepG2 cells.
ENSG00000115808	STRN	741.345	454.953	0.69065	striatin, calmodulin binding protein		Amy Ticoll	TF Gene Candidate		Strn has mostly been characterized as a calmodulin binding scaffolding protein (ie. PMID: 11707266). The N-terminal region of SG2NA (aa 1-391) acts as a strong transcriptional activator in transfection assays. Experiments characterizing the role in regulation not found.	11570823	Transactivation	Human	Medium	The N-terminal region of SG2NA (aa 1-391) acts as a strong transcriptional activator in transfection assays using mammalian cells.
ENSG00000115816	CEBPZ	805.187	529.129	0.59459	CCAAT/enhancer binding protein zeta		Amy Ticoll	TF Gene	Transcription Factor Binding: tf co-factor binding	EMSA and exonuclease III protection assays indicate CBF binds specifically to the CCAAT element of the hsp70 promoter. Expression of CBF cDNA activates transcription from cotransfected hsp70 promoter-reporter gene constructs in a CCAAT-dependent manner. The evidence in PMID 17513780 is not very convincing. They claim that they have extracted everything else so the only protein that could be bindi…	2247079	DNA Binding	Human	Strong	EMSA assays indicate CBF binds specifically to the CCAAT element of the hsp70 promoter. Experiments conducted with appropriate controls. Results confirmed with exonuclease III protection assays.
ENSG00000116132	PRRX1	600.502	160.361	1.8436	paired related homeobox 1		Amy Ticoll	TF Gene	Transcription Factor Binding: tf co-factor binding	Phox1 (Prrx1) is copurified with DNA-binding transcription factor SPIN. Results confirmed with GST pull-down assays. Transfection assays indicate SPIN/TFII-I cooperates with Phox1 to regulate transcription of the c-fos SRE.	9334314	TF PPI	Human	Strong	Phox1 (Prrx1) is copurified with SPIN from HeLa cell extracts. Results confirmed with GST pull-down assays. DNase I footprinting analysis indicates SPIN binds to multiple sites in the c-fos promoter.
ENSG00000116717	GADD45A	1417.68	1852.55	-0.38101	growth arrest and DNA-damage-inducible 45 alpha		Amy Ticoll	TF Gene	Transcription Factor Binding: tf co-factor binding	Yeast two-hybrid studies and GST pulldown assays indicate Gadd45a binds nuclear hormone receptors including RXR-alpha and RAR-alpha. Co-transfection assays in NIH/3T3 cells indicate Gadd45 proteins activate the transactivation function of nuclear receptors.	10872826	TF PPI	Human	Medium	Yeast two-hybrid studies and GST pulldown assays indicate Gadd45a binds nuclear hormone receptors including RXR-alpha and RAR-alpha. Experiments were conducted with appropriate controls.
ENSG00000117475	BLZF1	148.732	92.3791	0.64495	basic leucine zipper nuclear factor 1		Wyeth Wasserman	TF Gene Candidate	Transcription Factor Binding: tf co-factor binding	No evidence for sequence specific DNA binding (not ruled out); suffficient evidence tha tit interacts with other TFs and can modulate their activity	9129147	Other	Human	Weak	nuclear localizationcloning
ENSG00000117475	BLZF1	148.732	92.3791	0.64495	basic leucine zipper nuclear factor 1		Wyeth Wasserman	TF Gene Candidate	Transcription Factor Binding: tf co-factor binding	No evidence for sequence specific DNA binding (not ruled out); suffficient evidence tha tit interacts with other TFs and can modulate their activity	10602419	Co-activation	Human	Weak	DNA mobility shift assays showed that the in vitro translated Jem protein interacts neither with the DNA binding site of AP-1, nor directly with in vitro co-translated c-Fos or/and c-Jun proteins bound to this specific sequence. Interestingly, Jem-1-1 increased substantially the transcriptional activity of c-Jun (three-fold) and more strongly that of ectopically co-expressed c-Fos and c-Jun (five…
ENSG00000118263	KLF7	760.685	387.037	0.95307	Kruppel-like factor 7 (ubiquitous)	Zinc-coordinating Group/BetaBetaAlpha-zinc finger Family	Sarav Sundararajan	TF Gene	DNA-Binding: sequence-specific		9774444	DNA Binding; Transactivation	Human	Strong	This paper describes the cloning and characterization of Klf7. EMSA assays show that Klf7 can bind to oligonucleotides containing GATA-1 and Sp1 binding sites. CAT reporter assays using a UAS-CAT construct show that GAL4(DBD)-Klf7 can transactivate this synthetic promoter.
ENSG00000119547	ONECUT2	89.0414	145.093	-0.67712	one cut domain, family member 2	Helix-Turn-Helix Group/Homeodomain Family	Jared Roach	TF Gene	DNA-Binding: sequence-specific		9915796	DNA Binding	Human	Not Selected	homeodomain. EMS assay for DNA binding.
ENSG00000119950	MXI1	363.162	259.125	0.4795	Max interacting protein 1	Zipper-Type Group/Helix-Loop-Helix Family	Sarav Sundararajan	TF Gene	DNA-Binding: sequence-specific		8425219	DNA Binding	Human	Strong	The authors show sequence-specific DNA binding of Mxi1 to the consensus Myc binding site through GST pull-down assays.
ENSG00000119950	MXI1	363.162	259.125	0.4795	Max interacting protein 1	Zipper-Type Group/Helix-Loop-Helix Family	Sarav Sundararajan	TF Gene	DNA-Binding: sequence-specific		15467743	Other	Human	Strong	Performed reporter assays on GAL4 with Mxi1 N-terminus fusion proteins and showed transrepression. Also performed reporter assays with the full length Mxi1-SRalpha and Mxi1-SRbeta using E-box based reporters and showed that the beta isoform showed increased transrepression.
ENSG00000120656	TAF12	245.33	347.133	-0.4918	TAF12 RNA polymerase II, TATA box binding protein (TBP)-associated factor		Amy Ticoll	TF Gene	Basal Transcription Factor; Transcription Factor Binding: tf co-factor binding	Transfected hTAF20 (Taf12) is coprecipitated with TBP in COS cells. ATF7 and TAF12 interact in co-immunoprecipitation and GST pull-down assays. ChIP assays indicate ATF7 and TAF12 target the genomic E-selectin promoter. Transfection assays in Cos-1 cells show ATF7-induced transactivation is mediated by hsTAF12.	15735663	Co-activation	Human	Strong	ATF7 and hsTAF12 interact in co-immunoprecipitation assays using transfected Cos-1 cells. Results confirmed with GST pull-down assays. ChIP assays indicate ATF7 and TAF12 target the genomic E-selectin promoter.
ENSG00000120656	TAF12	245.33	347.133	-0.4918	TAF12 RNA polymerase II, TATA box binding protein (TBP)-associated factor		Amy Ticoll	TF Gene	Basal Transcription Factor; Transcription Factor Binding: tf co-factor binding	Transfected hTAF20 (Taf12) is coprecipitated with TBP in COS cells. ATF7 and TAF12 interact in co-immunoprecipitation and GST pull-down assays. ChIP assays indicate ATF7 and TAF12 target the genomic E-selectin promoter. Transfection assays in Cos-1 cells show ATF7-induced transactivation is mediated by hsTAF12.	7729427	TF PPI	Human	Medium	Transfected hTAF20 (Taf12) is coprecipitated with TBP in COS cells.
ENSG00000120738	EGR1	1210.38	681.124	0.80669	early growth response 1	Zinc-coordinating Group/BetaBetaAlpha-zinc finger Family	David Martin	TF Gene	DNA-Binding: sequence-specific		9858508	DNA Binding	Human; Mouse	Strong	The binding of a recombinant Egr-1 produced a DNA-protein complex is studied by Electrophoretic Mobility Shift Assays. The specificity of Egr-1 binding was demonstrated by a competition assay using an excess of an oligonucleotide carrying an Egr-1 binding site and by the decreased mobility of the complex upon the addition of an Egr-1-specific antibody.
ENSG00000120738	EGR1	1210.38	681.124	0.80669	early growth response 1	Zinc-coordinating Group/BetaBetaAlpha-zinc finger Family	David Martin	TF Gene	DNA-Binding: sequence-specific		10049687	Transactivation	Human; Mouse	Strong	An Egr-1 mutant comprising the entire C-terminal activation domain and partly truncated DNA-binding and nuclear translocation domains function as the transdominant repressor of Egr-1-dependent gene transcription (luciferase reported plasmid).
ENSG00000121060	TRIM25	2251.36	2770.45	-0.29568	tripartite motif-containing 25		Jared Roach	Not a TF - Evidence that it is not a TF		#JR#2-22-06BLink indicates human ortholog is TRIM25.Human EntrezGene: "The protein localizes to the cytoplasm. The presence of potential DNA-binding and dimerization-transactivation domains suggests that this protein may act as a transcription factor, similar to several other members of the TRIM family."However, see the evidence in PMID 12943693 that makes a strong case against TF.	12943693	Other	Human	Medium	By yeast two-hybrid screen, we identified that Efp interacts with 14-3-3sigma, which is known as a cell cycle brake that causes G2 arrest and expressed in normal mammary glands. In vitro studies have revealed that Efp functions as a ubiquitin-protein ligase (E3) that targets 14-3-3sigma. These data suggest that Efp controls breast cancer growth through ubiquitin-dependent proteolysis of 14-3-3sig…
ENSG00000124766	SOX4	1187.21	217.914	2.4032	SRY-box containing gene 4	Other Alpha-Helix Group/High Mobility Group (Box) Family	Wyeth Wasserman	TF Gene Candidate	DNA-Binding: sequence-specific	FROM PMID 7706298A strong T cell-specific enhancer is located 3' to the human CD2 gene. Six sequences within this enhancer are bound by proteins present in T cell nuclear extracts. These sequences share homology with sequences bound by several transcription factors involved in T cell- and lymphoid-specific transcription. The results presented here demonstrate that the human T cell-specific transc…	7706298	DNA Binding; Transactivation	Human	Medium	Early paper but good for the time.
ENSG00000124782	RREB1	839.1	561.06	0.57209	ras responsive element binding protein 1	Zinc-coordinating Group/BetaBetaAlpha-zinc finger Family	Jaspar Database	TF Gene	DNA-Binding: sequence-specific		8816445	DNA Binding	Human	Strong	DNA selection/amplification experiments and transient transfections of CT gene promoter-reporter constructs demonstrate that this gene is a DNA binding sequence-specific transcription factor.
ENSG00000125378	BMP4	160.455	423.285	-1.3502	bone morphogenetic protein 4		Amy Ticoll	Indeterminate - There is no evidence for or against this gene's role as a TF		EMSAs performed with nuclear proteins treated with BMP-4 forms specific shifted complexes with the TCE probe. No additional evidence is found showing BMP4 plays a nuclear role. BMP4 is shown to bind cell surface proteins involved in transcriptional regulation, and is thus unlikely to be involved in transcriptional regulation (PMID:15621726).	12538588	TF PPI	Human	Weak	EMSAs performed with nuclear proteins prepared from VSMCs treated with BMP-4 forms specific shifted complexes with the TCE probe. Results suggest BMP-4 enhances nuclear protein binding to the probe.
ENSG00000125618	PAX8	53.5242	98.0493	-0.78194	paired box gene 8	Helix-Turn-Helix Group/Homeodomain Family	Tim Hughes	TF Gene	DNA-Binding: sequence-specific	Pax8 encodes a protein with a Pax domain but not the typical associated homeodomain. In vitro translated Pax8, and also the PAX domain from Pax8, bind to specific short sequences found in the promoters of the promoters of thyroglobulin and thyroperoxidase, and can also activate reporters containing this sequence in cotransfection assays (PMID: 1508216).	1508216	DNA Binding; Transactivation	Human; Mouse	Not Selected	In vitro translated Pax8, and also the PAX domain from Pax8, bind to specific short sequences found in the promoters of the promoters of thyroglobulin and thyroperoxidase, and can also activate reporters containing this sequence in cotransfection assays.
ENSG00000125740	FOSB	64.2159	135.643	-0.98508	FBJ osteosarcoma oncogene B		Debra Fulton	TF Gene	Transcription Factor Binding: tf co-factor binding	Fos-B can interact with cjun or jun B/Fox-B (as demonstrated by EMSA and quantitation binding studies). Chromatin immunoprecipitation (ChIP) assay demonstates JunB/FosB binding to the intrinsic (murine genomic) MMP-2 promoter. EMSA of ventricular nuclear extracts demonstrates specific nuclear protein-DNA interactions containing the activator proteins-1 (AP-1) site in the MMP-2 promoter. EMSA of v…	2498083	TF PPI	Human	Medium	EMSA binding studies and quantitation analysis between in vitro synthesized c-fos, fos B, c-jun and jun B proteins and a 32P-labelled AP-1 binding consensus sequence or TRE (TPA response element) oligodeoxynucleotide demonstrate that combinations of c-fos or fos B proteins with c-jun or jun B proteins interact and are more efficient in binding DNA. Immunoprecipitation studies either on single c-j…
ENSG00000125968	ID1	1000.3	504.581	0.86726	inhibitor of DNA binding 1		Sarav Sundararajan	TF Gene Candidate	Transcription Factor Binding: tf co-factor binding	No DNA binding evidence (since this protein is lacking the basic domain and only has the HLH domain), but strong evidence of binding to other b-HLH transcription factors and inhibition of their binding affinity to DNA.	11234019	Other	Human	Strong	Demonstrate with pull-down assays that Ets2 binds to Id1. Also show that activation of the p16 promoter by Ets2 is disrupted by Id1 with LacZ reporter assays.
ENSG00000126351	THRA	415.506	884.884	-1.0653	thyroid hormone receptor alpha	Zinc-coordinating Group/Hormone-nuclear Receptor Family	Amy Ticoll	TF Gene	DNA-Binding: sequence-specific	Recombinant Thra protects two regions in a segment of the human CYP7A1 gene promoter in deoxyribonuclease I footprinting. In EMSAs Thra binds to both regions specifically. Thra and L-T3 cotransfected in hepatoma cells decrease chloramphenicol acetyltransferase activity.	11773435	DNA Binding	Human	Strong	Recombinant Thra protects two regions in a segment of the human CYP7A1 gene promoter in deoxyribonuclease I footprinting. In EMSAs Thra binds to both regions. Binding competed by oligonucleotides bearing an idealized Thra binding motif and abolished by mutation of these elements.
ENSG00000127616	SMARCA4	5906.75	4332.15	0.44343	SWI/SNF related, matrix associated, actin dependent regulator of chromatin, subfamily a, member 4		Sarav Sundararajan	TF Gene Candidate	Transcription Factor Binding: tf co-factor binding; Transcription Regulatory Activity: heterochromatin interaction/binding		12244326	TF PPI	Human	Strong	Coimmunoprecipitation shows that BRG1 interacts with STAT2 using flag- and GST-tagged BRG1. BRG1 was shown to upregulate a subset of IFN-alpha-inducible genes. ChromatinIP shows that SWI/SNF (of which BRG1 is a component) is recruited to the 9-27 promoter and luciferase reporter assays show that BRG1 is required for IFN-alpha-induced activation of the 9-27 promoter. Deletion studies map the bindi…
ENSG00000129315	CCNT1	764.231	507.31	0.57823	cyclin T1		Debra Fulton	TF Gene Candidate	Transcription Factor Binding: tf co-factor binding	Cyclin T1 is a component of P-TEFb and acts as a co-factor in transcription elongation. P-TEFb facilitates transcription by phosphorylating the carboxy-terminal domain (CTD) of RNA polymerase II. Recruitment of cyclin T1 to the cad promoter via a Gal4 fusion protein or through protein-protein interaction with the HIV-1 Tat protein activates cad transcription. Binding of granulin to cyclin T1 inhi…	12177005	Co-activation	Human; Mouse	Medium	The (E.coli) synthesis and immobilization of Myc-GST fusions to glutatione-Sepharose beads with a HeLa nuclear extract wash demonstrate that (through Western blot analysis) cyclin T1 is able to bind a Myc-GST fusion. Cotransfection of a Myc deletion construct fusion to the Gal4 DNA binding domain in to murin NIH3T3 cells demonstrate that the Myc constructs (with region to bind cyclin T1) also ret…
ENSG00000129315	CCNT1	764.231	507.31	0.57823	cyclin T1		Debra Fulton	TF Gene Candidate	Transcription Factor Binding: tf co-factor binding	Cyclin T1 is a component of P-TEFb and acts as a co-factor in transcription elongation. P-TEFb facilitates transcription by phosphorylating the carboxy-terminal domain (CTD) of RNA polymerase II. Recruitment of cyclin T1 to the cad promoter via a Gal4 fusion protein or through protein-protein interaction with the HIV-1 Tat protein activates cad transcription. Binding of granulin to cyclin T1 inhi…	12588988	Co-activation	Human; Mouse; Other	Medium	Yeast two-hybrid screen with a cyclin T1 construct as a bait against HeLa cDNA library linked to the GAL4 AD demonstrate a strong interaction (as determined by ?-galactosidase activity levels) with partial cDNA sequence of growth factor granulin. C-terminal and N-terminal truncations of cyclin T1 expressed in E. coli and tested in the yeast two-hybrid system indicate that cyclin T1 interacts with…
ENSG00000129911	KLF16	848.583	534.199	0.65471	Kruppel-like factor 16	Zinc-coordinating Group/BetaBetaAlpha-zinc finger Family	Debra Fulton	TF Gene	DNA-Binding: sequence-specific	Klf16 is a transcription factor. It binds the basic transcription element (BTE) site from the CYP1A1 promoter invivo and invitro by EMSA and immunoprecipitation/PCR amplification. Klf16 N-terminus region represses Gal4 reporter activity (by Gal4-BTEB4 fusion assay) and activates CYP1A1 promoter-reporters in transfected HepG2 cells. In addition, GST pull-down and immunoprecipitation assays show th…	12036432	DNA Binding; Transactivation	Human; Other	Strong	Cotranfsection of various regions of BTEB4-GAL4 DBD into CHO cells together with a GAL4 reporter plasmid demonstrates that BTEB4 N-terminus represses reporter activity ~50-fold. Western-blot analysis of the pull-down complexes in CHO cell lysates demonstrates that the N-terminus of BTEB4 specifically interacts with mSin3A in vitro. BTEB4 binds to the BTE site from the CYP1A1 promoter by EMSA.Cotr…
ENSG00000131018	SYNE1	5340.06	1596.36	1.7126	synaptic nuclear envelope 1		Andrew Kwon	Probably Not a TF - No evidence that it is a TF		Syne-1 and its splice variants are shown to bind to cytoskeleton components and found on nuclear envelope and Golgi bodies, and have been found to take part in cytokinesis. There is no evidence that this protein binds to DNA or other DNA-binding proteins.	14709720	Other	Human	Not Selected	Cells with Syne-1 fragment GSSF1 transfected exhibit defective cytokinesis, giving rise to binucleate cells. Yeast 2-hybrid screen showed that GSSF1 binds to Kinesin II subunit KIF3B. Immunoprecipitation of tagged GSSF1 and KIF3B showed that they interact together. Staining Syne-1 using Syne-1 Ab showed that it localizes to mitotic spindle during mistosis.
ENSG00000131018	SYNE1	5340.06	1596.36	1.7126	synaptic nuclear envelope 1		Andrew Kwon	Probably Not a TF - No evidence that it is a TF		Syne-1 and its splice variants are shown to bind to cytoskeleton components and found on nuclear envelope and Golgi bodies, and have been found to take part in cytokinesis. There is no evidence that this protein binds to DNA or other DNA-binding proteins.	10878022	Other	Human	Not Selected	Anti-Syne-1 Ab stained and high magnification suggested that Syne-1 associated with the nuclear envelope of muscle cell types.
ENSG00000132964	CDK8	247.433	172.902	0.49854	cyclin-dependent kinase 8		Warren Cheung	TF Gene	Transcription Factor Binding: tf co-factor binding	Shown to associate with MAM and affect transactivation of Hes1 promoter. Yeast homolog shown to be involved with phosphorylation of RNA Pol II subunits.	15546612	TF PPI	Human	Medium	Notch signalling activates Hes1 gene, shown in vivo C33A cells by increased Hes1 RNA and levels of Hes1 proteins at various timepoints. ChIP shows CDK8 recruited to Hes1 promoter in the same timeframe that Hes1 gene is activated. It is shown to bind to MAM (Western blot). Has an inhibitory effect on luciferase-Hes1 activity.
ENSG00000133794	ARNTL	122.223	174.024	-0.496	aryl hydrocarbon receptor nuclear translocator-like	Zipper-Type Group/Helix-Loop-Helix Family	Debra Fulton	TF Gene	DNA-Binding: sequence-specific	Yeast two-hybrid, yeast one-hybid, and selection amplification assays suggest that ARNT1 forms a complex with other protein partners (NPAS2, CLOCK) and binds e-box motifs. These complexes transactivate reporter genes fused to e-box motif binding domains.	9576906	DNA Binding; TF PPI	Human	Medium	Yeast two-hybrid cDNA library screen shows that ARNT1(MOP3)-NPAS2 neuronal PAS domain protein 2 (MOP4) interact. Selection and amplification protocol suggests that the DNA sequence bound by ARNT1-NAPS2 complex is G/TGA/GACACGTGACCC (this sequence is an imperfect palindrome containing a core E-box element). Cotransfection of the above sequence upstream of a minimal simian virus 40 promoter-lucifer…
ENSG00000134086	VHL	1564.28	1198.38	0.38051	von Hippel-Lindau syndrome homolog		Amy Ticoll	TF Gene Candidate		VHL exhibits repression effects on the HIF-1&#945; transactivation in human cells.	12682018	Transactivation	Human	Medium	VHL exhibits repression effects on the HIF-1&#945; transactivation in both HEK 293 and human renal cell carcinoma A498 cells.
ENSG00000134574	DDB2	3041.97	4062.6	-0.4089	damage specific DNA binding protein 2		Rob Sladek	TF Gene Candidate	Transcription Factor Binding: tf co-factor binding	DDB1 (p127) and DDB2 (p48) form subunits of the damage-specific DNA binding protein. The DDB1 subunit binds DNA nonspecifically to DNA containing UV radiation photoproducts, while the DDB2 subunit interacts with p300.	12034848	TF PPI	Human	Strong	DDB2 binds p300.
ENSG00000134574	DDB2	3041.97	4062.6	-0.4089	damage specific DNA binding protein 2		Debra Fulton	TF Gene Candidate	Single stranded RNA/DNA binding; Transcription Factor Binding: tf co-factor binding		9418871	Co-activation	Human	Strong	Expression of DDB stimulated transcription from the E2F1 promoter (CAT reporter assay). The interaction between DDB and E2F1 can also be detected by coimmunoprecipitation experiments.Used Gal4 fusion constructs containing E2F1 and a reporter CAT gene containing five Gal4-binding sites demonstrate that DDB associates with the activation domain of E2F1 and stimulate E2F1-activated transcription.
ENSG00000134574	DDB2	3041.97	4062.6	-0.4089	damage specific DNA binding protein 2		Sarav Sundararajan	TF Gene Candidate	Transcription Factor Binding: tf co-factor binding; Single stranded RNA/DNA binding		9418871	Transactivation	Human	Strong	p48 subunit of DDB2 binds to and activates E2F1. Binding of DDB2 to damaged DNA prevents E2F1-mediated transcrition of cell-cycle genes.
ENSG00000134574	DDB2	3041.97	4062.6	-0.4089	damage specific DNA binding protein 2		Debra Fulton	TF Gene Candidate	Single stranded RNA/DNA binding; Transcription Factor Binding: tf co-factor binding		12145536	Non-specific DNA	Human	Strong	Damaged-DNA recognition activity has been identified as a complex of DDB1 (127-kD) and DDB2 (48-kD) subunits. Over-expression of DDB1 did not augment UV-damaged-DNA recognition activity in human HeLa, hamster V79, or rat PC12 cells. Restricting DDB2 expression by antisense ddb2 partially inhibited UV-damaged-DNA recognition activity in cells and overexpressing DDB2 through a recombinant ddb2 aden…
ENSG00000136603	SKIL	630.896	417.676	0.5855	SKI-like		Elodie Portales-Casamar	TF Gene	Transcription Factor Binding: tf co-factor binding	The SKIL oncoprotein was found to interact with Smad2 and Smad4 and to repress their abilities to activate transcription through recruitment of the transcriptional corepressor N-CoR.The ski binding site described seems to be a Smad binding site and SKIL would not bind DNA directly but through Smad proteins, inhibiting them by recruiting a nuclear repressor complex.	10531062	Other	Human	Strong	Skil interacts with the MH2 domains of Smad2, Smad3, and Smad4 (co_IP in 293T cells).Skil binds to the GTCTAGAC element through interaction with Smad4 (EMSA in 293T cells).SnoN represses TGF-beta and/or Smad4-induced transcriptional activation of a gene reproter carrying copies of this element in Hep3B cells.Skil recruits the repressor N-CoR to Smad4 (co-IP in 293T cells).
ENSG00000136717	BIN1	464.822	973.318	-1.0475	bridging integrator 1		Rob Sladek	Indeterminate - There is no evidence for or against this gene's role as a TF			15992821	Co-activation	Human	Strong	Bin1 is a nucleocytoplasmic protein containing a C-terminal SH3 domain that interacts with myc through a motif in the MBI region (the MBI region is thought to negatively regulate c-Myc transcriptional activity).Chromatin immunoprecipitation localizes Bin1 to the myc-regulated carbamoyl phosphate synthase/aspartate transcarbamoylase/dihydroorotase (CAD) promoter in MCF-7 breast carcinoma cells.
ENSG00000136807	CDK9	923.463	1224.83	-0.40029	cyclin-dependent kinase 9 (CDC2-related kinase)		Wyeth Wasserman	TF Gene	Basal Transcription Factor; Transcription Factor Binding: tf co-factor binding	aka PITALREinteractions with pol II and phosphorylates italso appears to interact with and phosphorylate other TFs"the catalytic subunit of the positive-transcription elongation factor b"	12063565	Other	Human	Weak	review article linking CDK9 and transcription
ENSG00000136807	CDK9	923.463	1224.83	-0.40029	cyclin-dependent kinase 9 (CDC2-related kinase)		Wyeth Wasserman	TF Gene	Basal Transcription Factor; Transcription Factor Binding: tf co-factor binding	aka PITALREinteractions with pol II and phosphorylates italso appears to interact with and phosphorylate other TFs"the catalytic subunit of the positive-transcription elongation factor b"	10656684	TF PPI	Human	Medium	Interaction with myb-1 indicates that CDK9 has some TF like characteristics Paper indicates dominant negative CDK9 can suppress transcription of Cmyb and the opposite (more CDK9 increases transcription
ENSG00000136826	KLF4	263.479	389.736	-0.54274	Kruppel-like factor 4 (gut)	Zinc-coordinating Group/BetaBetaAlpha-zinc finger Family	Andrew Kwon	TF Gene	DNA-Binding: sequence-specific	GKLF is a transcription factor that binds to a specific motif and activates the gene expression, as supported by various EMSA, cotransfections and DNaseI footprint experiments. It is also capable of autoregulation.	9553140	DNA Binding; Transactivation	Human	Strong	In the 293 cell line without GKLF expression, transfection with ED-L2 promoter reporter construct that has the CACACCC motif resulted in 100-fold increase in promoter activity. Constructs with mutations in this motif did not result in increased expression. This was repeated with human K4 constructs with a similar motif, resulting in 25-fold increase when the motif was present. EMSA showed that GK…
ENSG00000137309	HMGA1	28236.5	19582.8	0.52048	high mobility group AT-hook 1	Unclassified Structure/AT-hook Domain Family	Jared Roach	TF Gene	DNA-Binding: non-sequence-specific; Transcription Factor Binding: tf co-factor binding	Assignment seems fairly straightforward from the GeneRIFs.Wyeth's Action: I removed the heterochromatin assignment as this category has been problematic.	9199299	DNA Binding	Human; Other	Medium	HMG I(Y) - IFN-beta enhancer interactions were demonstrated by electrophoretic mobility shift assays (EMSAs), DNase I, and methylation interference experiments.
ENSG00000137413	TAF8	1214.98	698.236	0.78817	TAF8 RNA polymerase II, TATA box binding protein (TBP)-associated factorq		Gwenael Breard	TF Gene Candidate	Basal Transcription Factor	Results show that Tbn is able to bind TAF10, a subunit of the TFIID and TFTC in both Human and Mouse cells.Taf8 is induced and sequestered within TFIID upon differentiation of mouse preadipocytes to adipocytes, whereas expression of all other TAFs tested is slightly reduced. When ectopically expressed, the histone fold domain of TAF8 acted as a dominant-negative mutant and selectively inhibited a…	15870280	TF PPI	Human	Strong	Human TAF10, a subunit of both TFIID and TFTC, has three histone fold-containing interaction partners: TAF3, TAF8, and SPT7Like (SPT7L).When the NLS sequences of either TAF8 is mutated, TAF10 remains cytoplasmic, but a heterologous NLS can drive TAF10 into the nucleus.
ENSG00000137574	TGS1	565.089	356.28	0.65248	trimethylguanosine synthase homolog (S. cerevisiae)		Gwenael Breard	TF Gene Candidate	Transcription Regulatory Activity: heterochromatin interaction/binding	Authors report that PIMT strongly interacts with transcriptional coactivators, CBP, p300, and PBP under in vitro and in vivo conditions. Results suggest that Pimt contains methyltransferase activity and could act as a coregulator acting on methylation state of promoters. Histone acetylation, histone methylation, and selective coactivator methylation (namely CBP/p300 methylation) constitute novel …	11517327	Other	Human	Medium	Nuclear receptor coactivators participate in the transcriptional activation of specific genes by nuclear receptors. Zhu et al. (2001) isolated a nuclear receptor coactivator-interacting protein, designated PIMT, from a human liver cDNA library by using the coactivator peroxisome proliferator-activated receptor-interacting protein (PRIP) as bait in a yeast 2-hybrid screen. The PIMT cDNA encodes an…
ENSG00000137574	TGS1	565.089	356.28	0.65248	trimethylguanosine synthase homolog (S. cerevisiae)		Gwenael Breard	TF Gene Candidate	Transcription Regulatory Activity: heterochromatin interaction/binding	Authors report that PIMT strongly interacts with transcriptional coactivators, CBP, p300, and PBP under in vitro and in vivo conditions. Results suggest that Pimt contains methyltransferase activity and could act as a coregulator acting on methylation state of promoters. Histone acetylation, histone methylation, and selective coactivator methylation (namely CBP/p300 methylation) constitute novel …	11912212	Co-activation	Human	Medium	Authors report that PIMT strongly interacts with transcriptional coactivators, CBP, p300, and PBP under in vitro and in vivo conditions.Immunoprecipitation data showed that PIMT forms a complex in vivo with CBP, p300, PBP, and PRIP. PIMT appeared to be co-localized in the nucleus with CBP, p300, and PBP. PIMT enhanced PBP-mediated transcriptional activity of the PPAR , as it did for PRIP, indicat…
ENSG00000138303	ASCC1	283.541	400.221	-0.48016	activating signal cointegrator 1 complex subunit 1		Amy Ticoll	TF Gene	Transcription Factor Binding: tf co-factor binding	GST pull-down assays and yeast two-hybrid tests show ASC-1 (Ascc1) binds transcription factors including basal factors and nuclear receptors. Indirect immunofluorescence studies indicate ASC-1 can be localized in the nucleus. Cotransfection assays in CV-1 cells suggest ASC-1 is a transcription coactivator of nuclear receptors.	10454579	Co-activation	Human	Strong	GST pull-down assays and yeast two-hybrid tests show ASC-1 (Ascc1) binds basal transcription factors TBP and TFIIA, transcription integrators steroid receptor coactivator 1 (SRC-1) and CBP-p300, and nuclear receptors. Indirect immunofluorescence studies indicate ASC-1 can be localized in the nucleus.
ENSG00000140262	TCF12	898.698	709.128	0.33858	transcription factor 12	Zipper-Type Group/Helix-Loop-Helix Family	Gwenael Breard	TF Gene	DNA-Binding: sequence-specific	Based on studies of the mouse and chicken cDNAs, Zhang and Bina (1992) proposed that transcripts of HTF4 can be differentially spliced to yield distinct but related proteins which are evolutionarily similar to the products of the E2A gene, also known as transcription factor-3 (TCF3). In vitro assays had shown that HTF4 can form heterodimers with other bHLH proteins of class A (e.g., the E2A prote…	12826747	Other	Human	Unknown	Gan et al. (2002) identified 3 TCF12 variants that result from alternative splicing and differential exon utilization. Two of the variants differ in the 5-prime untranslated region but encode identical proteins.
ENSG00000140464	PML	1204.69	3000.4	-1.3008	promyelocytic leukemia		Amy Ticoll	TF Gene	Transcription Factor Binding: tf co-factor binding	SATB1 and PML interact in a yeast two-hybrid assay and coimmunoprecipitation. EMSA indicates SATB1 and PML interact at matrix attachment regions (MAR). Lucifase reporter assays indicate coexpression of SATB1 and PML enchances each protein's repression activity.	17173041	Co-activation	Human	Strong	SATB1 and PML interact in a yeast two-hybrid assay. Results confirmed with coimmunoprecipitation in nuclear lysates from Jurkat cells. EMSA indicates SATB1 and PML interact at matrix attachment regions (MAR).
ENSG00000140464	PML	1204.69	3000.4	-1.3008	promyelocytic leukemia		Elodie Portales-Casamar	TF Gene Candidate	Transcription Regulatory Activity: heterochromatin interaction/binding	PML obviously plays a role in the regulation of transcription by activating some transcription factors (like p53) and recruiting them in nuclear bodies.PML modulates histone deacetylation and loss of this function alters chromatin remodeling and gene expression.It's role seems to be much broader than only regulating transcription though, controling also genomic stability and DNA repair.	11259576	Other	Human	Medium	PML can serve as a transcriptional repressor when fused to the GAL4 DNA-binding domain.TSA, a specific inhibitor of histone deacetylase (HDAC), inhibits the transcriptional repression mediated by PML.PML is associated with HDAC (GST-pulldown and co-immunoprecipitation).PML promotes deacetylation of histone H3 on its targeted promoter in vivo (Chip assay with anti-acetylated histone H3-specific an…
ENSG00000140464	PML	1204.69	3000.4	-1.3008	promyelocytic leukemia		Elodie Portales-Casamar	TF Gene Candidate	Transcription Regulatory Activity: heterochromatin interaction/binding	PML obviously plays a role in the regulation of transcription by activating some transcription factors (like p53) and recruiting them in nuclear bodies.PML modulates histone deacetylation and loss of this function alters chromatin remodeling and gene expression.It's role seems to be much broader than only regulating transcription though, controling also genomic stability and DNA repair.	14663483	Other; TF PPI	Human; Mouse	Unknown	PML acts as molecular hub for the induction and/or reinforcement of programmed cell death through a selective and dynamic regulation of proapoptotic transcriptional events in the nuclear bodies. In addition, recent observations propose a role for PML in checkpoint responses upon DNA damage. Moreover, PML and the PML-NB have also been implicated in the control of genomic stability and DNA repair.I…
ENSG00000140682	TGFB1I1	1350.33	1024.36	0.39243	transforming growth factor beta 1 induced transcript 1	Zinc-coordinating Group/No Family Level Classification	Elodie Portales-Casamar	TF Gene	Transcription Factor Binding: tf co-factor binding; DNA-Binding: sequence-specific	Tgfb1i1 shuttles between focal adhesions and the nucleus.Its role in the nucleus hasn't been fully explored but 1 paper shows that it can bind directly to specific DNA-sequences and another one shows that it can transactivate a reporter gene carrying the p21 promoter in association with Sp1, p300 and Smad3.	14755691	Co-activation	Human	Medium	Transcriptional activation of the p21 promoter by nuclear localized Tgfb1i1 (gene reporter assay in C2C12 cells with the protein fused to a NLS signal).The transactivation occurs through the Sp1 sites (mutation analysis).Tgfb1i1 up-regulates the transcriptional activity of the glutamine-rich domain of Sp1 fused with GAL4 DNA binding domain, collaborating with p300 (gene reporter assay in C2C12 ce…
ENSG00000141448	GATA6	294.515	653.769	-1.1222	GATA binding protein 6		Amy Ticoll	TF Gene	Transcription Factor Binding: tf co-factor binding	GST pull-down and coimmunoprecipitation experiments demonstrate interaction between GATA-6 and Sp1. ChIP assays indicate the GATA-6 interaction with Sp1 occurs at the Sp site in the P450c17 promoter. GATA-6 transactivates a ¨C227/LUC construct significantly.	14988427	TF PPI	Human	Strong	GST pull-down and coimmunoprecipitation experiments demonstrate interaction between GATA-6 and Sp1. ChIP assays indicate the GATA-6 interaction with Sp1 occurs at the Sp site in the P450c17 promoter in NCI-H295A cells.
ENSG00000142082	SIRT3	734.674	989.009	-0.42129	sirtuin 3 (silent mating type information regulation 2, homolog) 3 (S. cerevisiae)		Debra Fulton	TF Gene Candidate		Sirt3 is a transcription factor candidate. A VNTR polymorphism in intron 5 of the SIRT3 gene demonstrates an allele-specific enhancer activity on a reporter gene.	15676284	Transactivation	Human	Weak	DNA sequence analyses of PCR fragments around the FGE conserved motif 50 individuals (human) indicates a VNTR (variable number of tandem repeats) polymorphism having a 72-bp core in the fifth intron of the gene. Four alleles were common (alleles 1?4), while two are rare (alleles 5 and 6). MatInspector V2.2 analysis on the 72-bp core fragment reveals that the T/C variation located in the second re…
ENSG00000143498	TAF1A	184.227	124.748	0.54313	TATA box binding protein (Tbp)-associated factor, RNA polymerase I, A		Debra Fulton	TF Gene	Basal Transcription Factor	Taf1a is a transcription factor. Taf1A binds DNA (by UV crosslinking) and associates with TBP to form a transcriptionally active TBP-TAF complex by EMSA assays and Western Blot.	8013460	DNA Binding; TF PPI	Human; Mouse	Strong	Human TBP associates with mouse TAFs to form a Pol I-specific, transcriptionally active TBP-TAF complex by EMSA assays and Western blottting.Both TAFI48 and TAF168 interact with DNA by UV crosslinking.
ENSG00000143799	PARP1	4428.43	3165.52	0.48065	poly (ADP-ribose) polymerase family, member 1	Zinc-coordinating Group/No Family Level Classification	Sarav Sundararajan	TF Gene Candidate	DNA-Binding: non-sequence-specific; Transcription Regulatory Activity: heterochromatin interaction/binding; DNA-Binding: sequence-specific; Transcription Factor Binding: tf co-factor binding	Some evidence of sequence-specific binding and transcriptional regulation, but most evidence indicates a role in transcriptional regulation through interactions with other transcription factors, or polyADP-Ribosylation of chromatin.	10744766	Co-activation	Human	Strong	Parp1 co-immunoprecipitates with b-MYB and enhances its transactivating activity in a luciferase reporter assay.
ENSG00000144218	AFF3	28.1407	58.1269	-0.9215	AF4/FMR2 family, member 3	Unclassified Structure/AF-4 Protein Family	Rob Sladek	TF Gene	DNA-Binding: non-sequence-specific	A protein containing AFF3 (LAF4) fused to the GAL4 DNA-binding domain activates UASx5-E1b-CAT in transiently transfected HeLa cells.In vitro translated AFF3 (LAF-4) binds double-stranded DNA cellulose; however, no studies have attempted to show sequence-specific binding.	8555498	Non-specific DNA; Transactivation	Human	Strong	A protein containing AFF3 (LAF4) fused to the GAL4 DNA-binding domain activates UASx5-E1b-CAT in transiently transfected HeLa cells.In vitro translated AFF3 (LAF-4) binds double-stranded DNA cellulose.
ENSG00000144747	TMF1	730.59	423.381	0.77491	TATA element modulatory factor 1		Stuart Lithwick	TF Gene	Transcription Factor Binding: tf co-factor binding	Human GM153 (referred to as ARA160 in PMID 1409643 and TRF in PMID 10428808) is a transcription cofactor which interacts with DNA and other regulatory proteins in order to regulate gene expression. GM153 interacts directly with an N-terminal moiety of the Androgen Receptor (AR) as demonstrated by far Western assay. In addition, GM153 interacts with the HIV-1 TATA binding region as demonstrated by…	10428808	Co-activation; TF PPI	Human	Strong	Human GM153 (referred to by the alias ARA160 in this PMID) interacted directly with the Androgen Receptor (AR) in a far Western blotting assay in which total protein extract lysates of E. coli strain BL21(DE3)pLysS expressing full-length GM153 were resolved by SDS-PAGE, incubated with probe corresponding to AR N-terminal peptide (residues 38-566), and then developed using S-protein alkaline phosp…
ENSG00000144747	TMF1	730.59	423.381	0.77491	TATA element modulatory factor 1		Stuart Lithwick	TF Gene	Transcription Factor Binding: tf co-factor binding	Human GM153 (referred to as ARA160 in PMID 1409643 and TRF in PMID 10428808) is a transcription cofactor which interacts with DNA and other regulatory proteins in order to regulate gene expression. GM153 interacts directly with an N-terminal moiety of the Androgen Receptor (AR) as demonstrated by far Western assay. In addition, GM153 interacts with the HIV-1 TATA binding region as demonstrated by…	1409643	DNA Binding	Human	Weak	A mobility shift was observed in an EMSA assay in which human GM153 (referred to by the alias TMF in this PMID) was incubated with labeled probe corresponding to the HIV-1 TATA region (nucleotides -46 to -10).
ENSG00000145012	LPP	1896.11	1121.82	0.74496	LIM domain containing preferred translocation partner in lipoma		Amy Ticoll	TF Gene	Transcription Factor Binding: tf co-factor binding	A yeast one-hybrid screen identifies LPP as a coactivator of transcription factor PEA3. Interactions between LPP and PEA3 are detected in GST pull-down and coimmunoprecipitation experiments. ChIP assays indicate LPP is recruited to PEA3-regulated promoters in vivo. Transfection assays in 293 cells show LPP regulates the expression of the PEA3 target gene MMP-1.	16738319	Co-activation	Human	Strong	A yeast one-hybrid screen identifies LPP as a coactivator of transcription factor PEA3. Interactions between LPP and full-length PEA3 are detected when either PEA3 or LPP is immobilized as a GST fusion protein. In coimmunoprecipitation experiments (293 cells), anti-LPP antibodies coprecipitated PEA3. ChIP assays on PEA3-driven promoters (293 cells, MDA-MB-231 cells) indicate LPP is recruited to P…
ENSG00000146232	NFKBIE	414.888	906.669	-1.1108	nuclear factor of kappa light polypeptide gene enhancer in B-cells inhibitor, epsilon		Sarav Sundararajan	Probably Not a TF - No evidence that it is a TF		Binds to c-Rel and regulates its nuclear-cytoplasmic localization.	11970947	TF PPI	Human	Strong	The authors demonstrate binding of NFKBIE to c-Rel and map the binding domain by deletion analysis, co-immunoprecipitation.
ENSG00000147604	RPL7	12096.1	9607.54	0.32898	ribosomal protein L7		Amy Ticoll	TF Gene	Transcription Factor Binding: tf co-factor binding	Yeast two-hybrid studies indicate that TRUP (Rpl7) interacts with the full length human thyroid hormone receptor (TR). EMSA demonstrates that TRUP inhibits TR-RXR heterodimers binding to a DR4 element. Transfection assays in Lmtk- cells suggest TRUP inhibits TR- and RAR-mediated transactivation.	7568167	TF PPI	Human	Strong	Yeast two-hybrid studies indicate that TRUP (Rpl7) interacts with the full length human thyroid hormone receptor (TR). EMSA (with in vitro translated proteins) demonstrates that TRUP inhibits TR-RXR heterodimers binding to a DR4 element. Experiments show TRUP interacts specifically with a subclass of nuclear hormone receptors.
ENSG00000147669	POLR2K	322.406	234.545	0.44334	polymerase (RNA) II (DNA directed) polypeptide K		Andrew Kwon	TF Gene Candidate	Transcription Factor Binding: tf co-factor binding	While the literature indicates that Polr2k is a mouse homolog of the RPC10 subunit of the RNA Pol II studied in yeast, I could not add the literature evidence for the yeast protein to this DB, and there were not enough studies done on the mouse subunit itself. Thus, Polr2k is being classified as a candidate only for now.	7651387	DNA Binding; Transactivation	Human	Weak	RNA polymerase II component proteins, including Hs10alpha/POLR2K, are conserved all the way to yeast. POLR2K was able to partially complement defective counterpart in yeast, as retarded growth was evident on inositolless medium at 30 degrees celsius and complete inositol auxotrophy at 37 degrees celsius. Yeast with defective RNA pol II do not grow on inositolless medium.
ENSG00000148303	RPL7A	10351.3	12371	-0.25443	ribosomal protein L7a		Amy Ticoll	TF Gene	Transcription Factor Binding: tf co-factor binding	Yeast two-hybrid studies indicate that TRUP (Rpl7a) interacts with the full length human thyroid hormone receptor (TR). EMSA demonstrates that TRUP inhibits TR-RXR heterodimers binding to a DR4 element. Transfection assays in Lmtk- cells suggest TRUP inhibits TR- and RAR-mediated transactivation.	7568167	TF PPI	Human	Strong	Yeast two-hybrid studies indicate that TRUP (Rpl7a) interacts with the full length human thyroid hormone receptor (TR). EMSA (with in vitro translated proteins) demonstrates that TRUP inhibits TR-RXR heterodimers binding to a DR4 element. Experiments show TRUP interacts specifically with a subclass of nuclear hormone receptors.
ENSG00000149311	ATM	1622.61	1163	0.47402	ataxia telangiectasia mutated homolog (human)		Stuart Lithwick	TF Gene Candidate	Transcription Factor Binding: tf co-factor binding	ATM is likely a negative regulator of other transcription factors. EMSA assays indicate that association of transcription factor AP-1 with DNA is increased in ATM double-knockout mice relative to wild type. As well, increased mRNA expression of transcription factor osterix, and increased protein expression of transcription factors c-fos and c-jun is observed in ATM double knockout mice relative t…	16461339	DNA Binding	Human	Strong	Through serial fractionation of human Raji cells, it was determined that association of ATM with chromatin increases after exposure to ionizing radiation.
ENSG00000150347	ARID5B	159.887	380.186	-1.2076	AT rich interactive domain 5B (Mrf1 like)	Helix-Turn-Helix Group/Arid Domain Family	Shannan HoSui	TF Gene Candidate	DNA-Binding: sequence-specific	Mrf-2 contains the ARID (AT-rich interaction domain) binding motif. Binding to AT-rich sequences has been demonstrated by gel mobility shift assays, NMR and selection assays. Repressor activity has been shown for the cytomegalovirus enhancer.	8649988	DNA Binding; Transactivation	Human	Medium	The nuclear protein MRF-2 binds to multiple sites on the modulator located upstream of the human cytomegalovirus major immediate early gene enhancer. Competitive binding assays demonstrate that MRF requires the presence of multiple A+T stretches for binding to DNA, rather than binding to a specific DNA sequence. Mutations of these stretches in the modulator reduce the binding activity of MRF, as …
ENSG00000151623	NR3C2	58.0129	117.48	-0.95356	nuclear receptor subfamily 3, group C, member 2	Zinc-coordinating Group/Hormone-nuclear Receptor Family	Rob Sladek	TF Gene	DNA-Binding: sequence-specific	NR3C2 was cloned by screening a human genomic DNA library with a probe derived from the human glucocorticoid receptor. A cloned DNA fragment, encoding part of the DNA binding domain, was used to screen a human kidney library to recover longer cDNA clones. NR3C2, expressed in Sf21 insect cells, bound to probes containing a glucocorticoid reponse element (GRE) in gel shift assays. NR3C2 induced exp…	3037703	Transactivation	Human	Strong	NR3C2 was cloned by screening a human genomic DNA library with a probe derived from the human glucocorticoid receptor. A cloned DNA fragment, encoding part of the DNA binding domain, was used to screen a human kidney library to recover longer cDNA clones. The isolated NR3C2 clone could induce expression, in reponse to aldosterone treatment, of a reporter construct containing the MMTV-LTR in trans…
ENSG00000151623	NR3C2	58.0129	117.48	-0.95356	nuclear receptor subfamily 3, group C, member 2	Zinc-coordinating Group/Hormone-nuclear Receptor Family	Rob Sladek	TF Gene	DNA-Binding: sequence-specific	NR3C2 was cloned by screening a human genomic DNA library with a probe derived from the human glucocorticoid receptor. A cloned DNA fragment, encoding part of the DNA binding domain, was used to screen a human kidney library to recover longer cDNA clones. NR3C2, expressed in Sf21 insect cells, bound to probes containing a glucocorticoid reponse element (GRE) in gel shift assays. NR3C2 induced exp…	8389140	DNA Binding	Human	Strong	NR3C2, expressed in Sf21 insect cells, bound to probes containing a glucocorticoid reponse element (GRE) in gel shift assays. NR3C2 interaction with the GREs contained in the MMTV-LTR was confirmed by DNaseI footprinting.
ENSG00000152795	HNRNPDL	3214.64	2610.36	0.29635	heterogeneous nuclear ribonucleoprotein D-like		Amy Ticoll	TF Gene Candidate	Single stranded RNA/DNA binding	JKTBP (Hnrpdl) binds JKT41 and FERE27 intronic elements in EMSA in a non-specific manner. Transient expression of JKTBP in SKM-1 cells represses CAT reporter genes under control of JKT41 and FERE27 elements.	9538234	Non-specific DNA	Human	Medium	JKTBP (Hnrpdl) binds JKT41 and FERE27 intronic elements in EMSA in a non-specific manner as indicated by competitors.
ENSG00000152944	MED21	347.663	239.972	0.52032	mediator complex subunit 21		Elodie Portales-Casamar	TF Gene	Basal Transcription Factor	Surb7 is part of the RNA polymerase II holoenzyme. The basal transcription factors TFIIE and TFIIH were also shown to be in the complex.The available data indicate that the yeast holoenzyme is responsible for all mRNA transcription initiation in a cell. The mammalian counterpart of the yeast holoenzyme has been less studied.	9159119	Co-activation	Human	Strong	Intact BRCA1 is a component of the RNA pol II holoenzyme in HeLa cell extracts. This has been shown by (i) copurification of a significant fraction (50%) of the BRCA1 in the cell with a complex containing pol II and the SRB10 homologue Cdk8; (ii) by coimmunopurification of BRCA1, Surb7, pol II, TFIIF, TFIIE, and TFIIH; and (iii) by association of epitope-tagged wild-type BRCA1 with the Surb7-cont…
ENSG00000152944	MED21	347.663	239.972	0.52032	mediator complex subunit 21		Elodie Portales-Casamar	TF Gene	Basal Transcription Factor	Surb7 is part of the RNA polymerase II holoenzyme. The basal transcription factors TFIIE and TFIIH were also shown to be in the complex.The available data indicate that the yeast holoenzyme is responsible for all mRNA transcription initiation in a cell. The mammalian counterpart of the yeast holoenzyme has been less studied.	8598913	Co-activation	Human	Strong	Surb7 is part of the RNA polymerase II holoenzyme (CTD-affinity chromatography from HeLa cells with use of specific antibodies). This RNA polymerase II holoenzyme also contains the general transcription factors TFIIE and TFIIH.This holoenzyme is more responsive to transcriptional activators than core RNA polymerase II when assayed in the presence of coactivators.
ENSG00000153187	HNRNPU	9111.51	6178.57	0.55531	heterogeneous nuclear ribonucleoprotein U		Sarav Sundararajan	TF Gene Candidate	Transcription Factor Binding: tf co-factor binding		9353307	TF PPI; Transactivation	Human	Strong	Binding of hnRNP U with the glucocorticoid receptor was shown by coimmunoprecipitation and nuclear colocalization by confocal laser microscopy. Moreover, overexpression of hnRNP U inhibited glucocorticoid mediated activation of the GRE-tkCAT reporter construct.
ENSG00000153187	HNRNPU	9111.51	6178.57	0.55531	heterogeneous nuclear ribonucleoprotein U		Sarav Sundararajan	TF Gene Candidate	Transcription Factor Binding: tf co-factor binding		15096513	TF PPI; Transactivation	Human	Strong	Coimmunoprecipitation experiments show that hnRNPU binds to YAP, a scaffolding protein known to interact with transcription factors. Luciferase reporter assays show that hnRNP can inhibit YAP-mediated activation of the BAX promoter.
ENSG00000153560	UBP1	2630.99	1237.83	1.0756	upstream binding protein 1		Debra Fulton	TF Gene	Transcription Factor Binding: tf co-factor binding	Ubp1 is a transcription factor. CP2 isoforms and PIAS1 form a complex (by ChIP, EMSA, supershifts, and yeast-two hybrid) and transactivates an {alpha}-globin promoter-reporter in erythroid cells. CP2b isoform weakly binds DNA indicating that CP2b activation is mediated by interaction with other isoforms that bind DNA.	15988015	Co-activation	Human; Mouse	Strong	Cotransfection of CP2 isoforms with either K562 or 293T cells along with a mouse {alpha}-globin promoter reporter demonstrates that CP2 strongly activates the {alpha}-globin promoter (by reporter assay and Western blotting).Cotransfection of K562 cells and MEL cells with CP2b and CP2c expression plasmids with a pGL3-mouse {alpha}-globin promoter demonstrated demonstrated an increase in activity o…
ENSG00000153879	CEBPG	697.311	515.656	0.42622	CCAAT/enhancer binding protein (C/EBP), gamma	Zipper-Type Group/Leucine Zipper Family	Debra Fulton	TF Gene Candidate	DNA-Binding: sequence-specific	C/EBP-gamma is possibly a transcriptional inhibitor. Gel shift assays demonstrate binding to the CCAAT-box probes and luciferase-reporter assays demonstrate that C/EBP-gamma inhibits the transcriptional activities of two proteins, C/EBPax and NF-IL6.	15833715	Other	Human; Mouse	Medium	Gel-shift assays with a radiolabelled wild-type human &#946;-globin CCAAT-box probe and nuclear extracts from DMSO-induced MEL cells (a murine erythroleukemic cell line) with C/EBP-gamma antibodies confirm the ability of C/EBP-gamma to bind the CCAAT-box probe. Co-transfection of plasmids encoding EKLF (EKLF is required for high-level &#946;-globin expression during definitive erythropoiesis), C/…
ENSG00000153879	CEBPG	697.311	515.656	0.42622	CCAAT/enhancer binding protein (C/EBP), gamma	Zipper-Type Group/Leucine Zipper Family	Debra Fulton	TF Gene Candidate	DNA-Binding: sequence-specific	C/EBP-gamma is possibly a transcriptional inhibitor. Gel shift assays demonstrate binding to the CCAAT-box probes and luciferase-reporter assays demonstrate that C/EBP-gamma inhibits the transcriptional activities of two proteins, C/EBPax and NF-IL6.	7501458	DNA Binding; Transactivation	Human; Mouse	Weak	We demonstrate here that Ig/EBP inhibits the transcriptional activities of two proteins, C/EBPax and NF-IL6 A luciferase-reporter assay (a promoter containing four C/EBP sites upstream of a minimal alkaline phosphatase TATA element) and deletion of the C/EBP site in the immunoglobulin VHl promoter demonstrate that endogenous Ig/EBP is not a transcriptional activator.Transfection of a luciferase-r…
ENSG00000155846	PPARGC1B	184.703	76.6471	1.1857	peroxisome proliferative activated receptor, gamma, coactivator 1 beta		Amy Ticoll	TF Gene	Transcription Factor Binding: tf co-factor binding	A yeast two-hybrid system indicates PERC interacts physically with the LBD of ERalpha. Coexpression of PERC with ERalpha in COS7 cells enhanced the activity of ERalpha in the presence of the agonist estradiol.	11854298	Co-activation	Human	Medium	A yeast two-hybrid system indicates PERC interacts physically with the LBD of ERalpha.
ENSG00000157557	ETS2	496.278	784.998	-0.64817	E26 avian leukemia oncogene 2, 3' domain	Winged Helix-Turn-Helix/Ets Domain Family	Amy Ticoll	TF Gene	DNA-Binding: sequence-specific	EMSA indicates Ets-2 binds to a specific region within the BRCA1 promoter. Transient transfections performed in MCF-7 cells suggest Ets-2 represses BRCA1 promoter activity.	12637547	DNA Binding	Human	Medium	EMSA indicates Ets-2 binds to a specific region within the BRCA1 promoter.
ENSG00000157557	ETS2	496.278	784.998	-0.64817	E26 avian leukemia oncogene 2, 3' domain	Winged Helix-Turn-Helix/Ets Domain Family	Amy Ticoll	TF Gene	DNA-Binding: sequence-specific	EMSA indicates Ets-2 binds to a specific region within the BRCA1 promoter. Transient transfections performed in MCF-7 cells suggest Ets-2 represses BRCA1 promoter activity.	12928043	DNA Binding	Human	Medium	Ets2 binds to a specific region within the human presenilin 1 promoter in yeast one-hybrid assays.
ENSG00000157613	CREB3L1	85.9108	158.961	-0.84041	cAMP responsive element binding protein 3-like 1	Zipper-Type Group/Leucine Zipper Family	Gwenael Breard	TF Gene	DNA-Binding: sequence-specific	OASIS is a basic leucine zipper (bZIP) transcription factor of the CREB/ATF family with a transmembrane domain that allows it to associate with the ER. The molecule is cleaved at the membrane in response to ER stress, and its cleaved amino-terminal cytoplasmic domain, which contains the bZIP domain, translocates into the nucleus where it activates the transcription of target genes that are mediat…	16236796	Other	Human	Unknown	Oasis localizes to the ER membrane
ENSG00000157613	CREB3L1	85.9108	158.961	-0.84041	cAMP responsive element binding protein 3-like 1	Zipper-Type Group/Leucine Zipper Family	Gwenael Breard	TF Gene	DNA-Binding: sequence-specific	OASIS is a basic leucine zipper (bZIP) transcription factor of the CREB/ATF family with a transmembrane domain that allows it to associate with the ER. The molecule is cleaved at the membrane in response to ER stress, and its cleaved amino-terminal cytoplasmic domain, which contains the bZIP domain, translocates into the nucleus where it activates the transcription of target genes that are mediat…	15665855	DNA Binding	Human	Strong	OASIS, a CREB/ATF-family member, modulates UPR signalling in astrocytes.
ENSG00000158711	ELK4	950.51	639.271	0.56533	ELK4, member of ETS oncogene family	Winged Helix-Turn-Helix/Ets Domain Family	Jaspar Database	TF Gene	DNA-Binding: sequence-specific		8524663	DNA Binding	Human	Strong	DNA binding specificity is demonstrated through selection/amplification experiments.
ENSG00000160633	SAFB	2830.66	2128.36	0.40658	scaffold attachment factor B		Amy Ticoll	TF Gene	Transcription Factor Binding: tf co-factor binding	GST pull-down assays indicate SAFB1 interacts with ER{alpha} and TAFII68. Interaction with TAFII68 confirmed using yeast two-hybrid assays and co-immunoprecipitation. Transfection assays in MCF-7 and CV-1 cells indicate SAFB1 mediates repression with these two proteins.	15066997	TF PPI	Human	Medium	GST pull-down assays indicate SAFB1 interacts with ER{alpha} and TAFII68. Interaction with TAFII68 confirmed using yeast two-hybrid assays and co-immunoprecipitation from MCF-7 cell lysate.
ENSG00000162599	NFIA	72.2184	25.7289	1.356	nuclear factor I/A	Unclassified Structure/Nuclear Factor I-CCAAT-binding Transcription Factor (NFI-CTF) Family	David Martin	TF Gene	DNA-Binding: sequence-specific	NFI-A binds by DNA binding assays. Dual-luciferase assay indicates NF1-A induces TR2 gene expression.	17010934	DNA Binding	Human	Strong	EMSA indicates NF1-A binds specifically to the PACE-C region. A dual-luciferase assay performed in human MCF7 breast cancer cells indicates NF1-A induces TR2 gene expression.
ENSG00000162772	ATF3	65.7911	317.338	-2.1522	activating transcription factor 3	Zipper-Type Group/Leucine Zipper Family	Sarav Sundararajan	TF Gene	DNA-Binding: sequence-specific	Conflicting evidence of whether this TF is an activator or a repressor, though most reports indicate that it functions as a repressor.	11916968	DNA Binding; Transactivation	Human; Mouse	Strong	Gel shift assay shows binding to the ATF/CRE consensus sequence of the PEPCK promoter. Transient transfection of ATF3 represses activity in a CAT reporter construct driven by the PEPCK promoter.
ENSG00000163602	RYBP	430.068	206.606	1.028	RING1 and YY1 binding protein		Tim Hughes	TF Gene	Transcription Factor Binding: tf co-factor binding	This gene was initially identified as interacting directly with of proteins of the mammalian Polycomb complex (Ring1A, Ring1B, and M33) by 2-hybrid, co-immunoprecipitation, and/or GST pulldown (PMID: 10369680). It also iteracts physically with YY1 by GST pulldown. By reporter co-transfection assay with a GAL4 fusion protein, RYBP acted as a repressor.RYBP was also been identified as a protein tha…	12411495	TF PPI; Transactivation	Human; Mouse	Not Selected	RYBP identified as a protein that interacts with E2F2 and E2F3 by 2-hybrid analysis. By reporter transfection assays, synergistic activation of the Cdc6 promoter by YY1, RYBP and E2F3 is observed. By Chip assay, YY1, E2F and RYB all interact with the Cdc6 and RR1 promoters.
ENSG00000163602	RYBP	430.068	206.606	1.028	RING1 and YY1 binding protein		Tim Hughes	TF Gene	Transcription Factor Binding: tf co-factor binding	This gene was initially identified as interacting directly with of proteins of the mammalian Polycomb complex (Ring1A, Ring1B, and M33) by 2-hybrid, co-immunoprecipitation, and/or GST pulldown (PMID: 10369680). It also iteracts physically with YY1 by GST pulldown. By reporter co-transfection assay with a GAL4 fusion protein, RYBP acted as a repressor.RYBP was also been identified as a protein tha…	10369680	TF PPI; Transactivation	Human; Mouse	Not Selected	This gene identified as interacting directly with of proteins of the mammalian Polycomb complex (Ring1A, Ring1B, and M33) by 2-hybrid, co-immunoprecipitation, and/or GST pulldow. Interacts physically with YY1 by GST pulldown. By reporter co-transfection assay with a GAL4 fusion protein, RYBP acted as a repressor.
ENSG00000163848	ZNF148	467.672	331.09	0.4893	zinc finger protein 148	Zinc-coordinating Group/BetaBetaAlpha-zinc finger Family	Jared Roach	TF Gene	DNA-Binding: sequence-specific	A gene encoding human Zfp148 binds the CACCC box of the human T-cell receptor in DNase footprinting and gel shift assays. Zfp148 also binds the CACCC box promoter of TCR, activating transcription in reporter assays.	8355710	DNA Binding	Human	Strong	A gene encoding human Zfp148 binds the CACCC box of the human T-cell receptor in DNase footprinting and gel shift assays.
ENSG00000163939	PBRM1	1678.44	869.245	0.93531	polybromo 1		Debra Fulton	TF Gene Candidate	Transcription Regulatory Activity: heterochromatin interaction/binding	BAF180 is a transcription factor candidate. BAF180 is a subunit of PBAF complex (by purification/immunoblot analysis) which contains an ATP-dependent nucleosome disruption activity by autoradiograph from mononucleosome disruption assays. BAF180 is present at the RAR2 and CRABPII promoters (by ChIP) and its absence (in null embronic hearts and KO ES cells) down-regulates RAR1 and CRABPII suggestin…	11078522	DNA Binding	Human	Weak	BAF180 is a specific subunit of PBAF complex in human KB cell nuclear extracts by purification and immunoblot analysis.Human PBAF contains an ATP-dependent mononucleosome disruption activity similar to BAF by autoradiograph from mononucleosome disruption assays with PBAF purified with either BAF180 or BRG1 antibodies.
ENSG00000163939	PBRM1	1678.44	869.245	0.93531	polybromo 1		Debra Fulton	TF Gene Candidate	Transcription Regulatory Activity: heterochromatin interaction/binding	BAF180 is a transcription factor candidate. BAF180 is a subunit of PBAF complex (by purification/immunoblot analysis) which contains an ATP-dependent nucleosome disruption activity by autoradiograph from mononucleosome disruption assays. BAF180 is present at the RAR2 and CRABPII promoters (by ChIP) and its absence (in null embronic hearts and KO ES cells) down-regulates RAR1 and CRABPII suggestin…	15601824	Other	Human	Medium	ChIP analysis reveals that BAF180 protein is present on the RAR2 promoter and the promoter region of CRABPII.Quantitative RT-PCR pf BAF180 null embryonic hearts and KO ES cells reveals down-regulation of RAR2 and CRABPII suggesting that BAF180 is required for the proper expression of these genes in vivo.
ENSG00000164442	CITED2	892.775	555.052	0.66309	Cbp/p300-interacting transactivator, with Glu/Asp-rich carboxy-terminal domain, 2		Wyeth Wasserman	TF Gene	Transcription Factor Binding: tf co-factor binding	A protein which physically interacts with CBP to suppress interactions with TFs. No DNA binding, but clearly a TF.	11044621	Co-activation; TF PPI; Transactivation	Human; Mouse	Weak	interactions with CBP; co-activating function
ENSG00000164442	CITED2	892.775	555.052	0.66309	Cbp/p300-interacting transactivator, with Glu/Asp-rich carboxy-terminal domain, 2		Wyeth Wasserman	TF Gene	Transcription Factor Binding: tf co-factor binding	A protein which physically interacts with CBP to suppress interactions with TFs. No DNA binding, but clearly a TF.	9434189	Co-activation; TF PPI; Transactivation	Human	Weak	co-activation but no DNA binding
ENSG00000164442	CITED2	892.775	555.052	0.66309	Cbp/p300-interacting transactivator, with Glu/Asp-rich carboxy-terminal domain, 2		Wyeth Wasserman	TF Gene	Transcription Factor Binding: tf co-factor binding	A protein which physically interacts with CBP to suppress interactions with TFs. No DNA binding, but clearly a TF.	12778114	Co-activation; TF PPI; Transactivation	Human	Strong	CITED2 competes for cysteine-histidine-rich 1 (CH1) domain of p300/CBP by binding CH1 with high affinity
ENSG00000165030	NFIL3	108.086	236.39	-1.0941	nuclear factor, interleukin 3, regulated	Zipper-Type Group/Leucine Zipper Family	Shannan HoSui	TF Gene	DNA-Binding: sequence-specific	E4BP4, a bZIP transcription factor, has been shown to have both repressor and enhancer activity using reporter gene assays. Direct binding to a ATTACGTCTG consensus sequence was shown using EMSA and DNase footprinting.	10074173	DNA Binding; Transactivation	Human	Medium	The binding specificity of E4BP4 was examined by competitive EMSA using a recombinant E4BP4 protein obtained by fusion of the E4BP4 open reading frame with that of the 1.3S subunit of the Proprionibacterium shermanii transcarboxylase. The results indicate that the sequence from nt 1650 to 1662 in box alpha was the binding site for E4BP4. This segment contains the sequence cTTACaTAAg (the lowercas…
ENSG00000165030	NFIL3	108.086	236.39	-1.0941	nuclear factor, interleukin 3, regulated	Zipper-Type Group/Leucine Zipper Family	Shannan HoSui	TF Gene	DNA-Binding: sequence-specific	E4BP4, a bZIP transcription factor, has been shown to have both repressor and enhancer activity using reporter gene assays. Direct binding to a ATTACGTCTG consensus sequence was shown using EMSA and DNase footprinting.	7565758	DNA Binding; Transactivation	Human	Medium	To define the transcriptional regulatory activity of NF-IL3A on the IL-3 promoter, transient transfections into MLA144 cells were performed. Introduction of the NF-IL3A BC12 expression plasmid into resting MLA144 T cells increased the CAT activity generated by the -315 and -173 plasmids 5.2- and 5.0-fold, respectively, compared with that generated by the BC12 expression vector alone. No significa…
ENSG00000165632	TAF3	272.45	194.983	0.46994	TAF3 RNA polymerase II, TATA box binding protein (TBP)-associated factor		Jared Roach	TF Gene	Basal Transcription Factor	Tafii140 (Taf3) interacts with TAFII30 in yeast 2-hybrid. Tafii140 forms complexes with TBP and TAFII18 in immunoprecipitation.	11438666	TF PPI	Human	Strong	Yeast 2-hybrid analysis shows Tafii140 (Taf3) interacts with human TAFII30. Immunoprecipitation analysis indicates Tafii140 forms complexes with TBP and TAFII18.
ENSG00000165684	SNAPC4	562.141	756.93	-0.42339	small nuclear RNA activating complex, polypeptide 4	Helix-Turn-Helix Group/Myb Domain Family	Stuart Lithwick	TF Gene	DNA-Binding: non-sequence-specific; Basal Transcription Factor; Transcription Factor Binding: tf co-factor binding	Snapc4 (referred to as SNAP190 in the PMID) regulates the transcription of snRNA genes by RNA Polymerase II and III as a part of the SNAPc multiprotein complex. In-vitro translated Snapc4 co-immunoprecipitates with in-vitro translated SNAPc subunit SNAP45. However, Snapc4 does not co-immunoprecipitate with SNAPc subunits SNAP50 and SNAP43 (data discussed but not shown in the PMID). Snapc4 binds t…	9418884	Co-activation; DNA Binding; TF PPI	Human	Strong	Snapc4 (referred to as SNAP190 in this PMID) co-immunoprecipitated with SNAP45, another SNAPc complex subunit, in a co-immunoprecipitation assay in which SNAP45 in-vitro translated in reticulocyte lysate was immunoprecipitated using anti-SNAP45, and Snapc4 was detected through Western blotting using anti-Snapc4. SNAP45 also co-immunoprecipitated with Snapc4 in a reciprocal experiment.A mobility s…
ENSG00000165891	E2F7	552.979	393.528	0.47028	E2F transcription factor 7	Winged Helix-Turn-Helix/Transcription Factor Family	Magdalena Swanson	TF Gene	DNA-Binding: sequence-specific	E2f7 is a TF. Recombinant E2F7 specifically binds E2F recognition sites in synthesized oligonucleotides and the DHFR, proliferating cell nuclear antigen, and E2 promoters in EMSA experiments. The recombinant protein represses activation of luciferase reporter constructs that contain E2F-responsive promoters in transient cotransfection studies.	14633988	DNA Binding	Human	Strong	EMSA experiments using U2OS cell extracts showed that recombinant human E2F7 binds specifically to wild-type and not mutant E2F binding sites on oligonucleotides.
ENSG00000166886	NAB2	1177.95	665.575	0.81136	Ngfi-A binding protein 2		Alice Chou	TF Gene Candidate	Transcription Factor Binding: tf co-factor binding	NAB2 co-activates LHbeta promoter-luciferase reporteo with EGR in CV-1 cells. Mutation analysis shows NAB2 coactivation is absolutely dependent on the presence of 2 functional EGR-binding sites in the LHbeta promoter. NAB2 co-represses vascular endothelial growth factor (VEGF)-induced TF promoter luciferase reporter in HUVEC cells. NAB2, which lacks the C-terminal part interacting with EGR-1, doe…	12427750	Co-activation	Human	Strong	Overexpression of NAB2 in HUVEC cells results in a dose-dependent inhibition of vascular endothelial growth factor (VEGF)-induced TF promoter activity in reporter gene assay, which is comparable to the inhibition of EGR-1-triggered promoter activity. A truncated variant of NAB2, which lacks the C-terminal part interacting with EGR-1, doe not block VEGF- and EGR-1-mediated transactivation.
ENSG00000166888	STAT6	3140.49	2391.9	0.38972	signal transducer and activator of transcription 6	Other/Stat Protein Family	Rob Sladek	TF Gene	DNA-Binding: sequence-specific	Stat6 was identified by searching an EST database for transcripts homologous to known conserved Stat protein motifs.Gel shift assays performed with IL4-treated human Kit225 T cells showed a single retarded band when incubated with a probe sequence containing the GAS-like element from the human immunoglobulin C-epsilon gene: antibody supershift studies confirmed that Stat6 was contained in retarde…	8810328	DNA Binding; Transactivation	Human	Strong	Gel shift assays performed with IL4-treated HeLa cells showed a single retarded band when incubated with a probe sequence containing the human IL4R gene promoter IFN-gamma-activated site (GAS) in gel shift assays. Participation of STAT6 in the retarded complex was demonstrated by antibody supershift.Cotransfection studies showed that recombinant STAT6 activated a reporter construct containing thr…
ENSG00000166949	SMAD3	1802.88	3058.7	-0.75598	MAD homolog 3 (Drosophila)	Zinc-coordinating Group/MH1 Domain Family	Jared Roach	TF Gene Candidate	DNA-Binding: sequence-specific	EMSA indicates Smad3 specifically binds the 8 bp palindrome SBE.	9660945	DNA Binding	Human	Medium	EMSA using full-length expressed and purified Smad4 protein indicates Smad3 specifically binds the 8 bp palindrome SBE.
ENSG00000167074	TEF	163.87	429.965	-1.3495	thyrotroph embryonic factor	Zipper-Type Group/Leucine Zipper Family	Gwenael Breard	TF Gene	DNA-Binding: sequence-specific	A well studied TF that both binds to DNA and modulates expression.	8440239	Co-activation	Human	Strong	Using a partially reconstituted HeLa cell in vitro transcription system and immunoprecipitation with a monoclonal antibody directed against TBP, authors show that stimulation of transcription by the chimeric activators GAL-VP16, GAL-TEF-1 and GAL-ER(EF) requires the presence of factors which are tightly associated with these TFIID complexes. Moreover, the activity of GAL-TEF-1 appears to be media…
ENSG00000167081	PBX3	483.111	282.412	0.75872	pre B-cell leukemia transcription factor 3	Helix-Turn-Helix Group/Homeodomain Family	Rob Sladek	TF Gene	DNA-Binding: sequence-specific	Gel shift assays show that in vitro syntheszed PBX3 binds to a modified HoxB2 r4 enhancer element as a heterodimer with Meis1.PBX3 activates transcription weakly from a reported construct controlled by a modified HoxB2 r4 enhancer element following transient transfection in human embryonic kidney cells. Cotransfection of PBX3 and MEIS1 resulted in increased activation of the reporter construct.	15466398	DNA Binding; Transactivation	Human	Strong	Gel shift assays show that in vitro syntheszed PBX3 binds to a modified HoxB2 r4 enhancer element as a heterodimer with Meis1.PBX3 activates transcription weakly from a reported construct controlled by a modified HoxB2 r4 enhancer element following transient transfection in human embryonic kidney cells. Cotransfection of PBX3 and MEIS1 resulted in increased activation of the reporter construct.
ENSG00000167771	RCOR2	18.3524	1.29318	2.205	REST corepressor 2		Elodie Portales-Casamar	TF Gene	Transcription Factor Binding: tf co-factor binding	coREST is REST co-repressor. The complex exhibits repressor activity.coREST seems to influence DNA methylation at least in the context of the BHC complex that includes the histone demethylase BHC110. It seems to enhance the association between BHC110 and nucleosomes, leading to increased nucleosomal demethylation.	16079794	Other	Human	Medium	The BHC complex is composed of six subunits, including the histone deacetylase HDAC1/2, the SANT-domain-containing protein CoREST, the PHD-domain-containing protein BHC80, the HMG-domain-containing protein BRAF35, and the recently described histone demethylase BHC110 (also known as LSD1).To define the subunit(s) involved in modulating the activity of BHC110 for H3K4 demethylation, they reconstitu…
ENSG00000167771	RCOR2	18.3524	1.29318	2.205	REST corepressor 2		Elodie Portales-Casamar	TF Gene	Transcription Factor Binding: tf co-factor binding	coREST is REST co-repressor. The complex exhibits repressor activity.coREST seems to influence DNA methylation at least in the context of the BHC complex that includes the histone demethylase BHC110. It seems to enhance the association between BHC110 and nucleosomes, leading to increased nucleosomal demethylation.	10449787	Other	Human	Medium	CoREST interacts with the C-terminal repressor domain of REST (Yeast two-hybrid and GST pull-down assays).CoREST exhibits repressor activity when fused to a Gal4- DBD and mediates repressor activity of REST (gene reporter assay with a UAS type II CAT reporter gene into HEK293 and PC12 cells).
ENSG00000167967	E4F1	631.59	811.023	-0.35463	E4F transcription factor 1		Amy Ticoll	TF Gene Candidate		E4F binds to the E4wt probe in gel retardation assays and studies involving UV cross-linking with nuclease digestion. Transfection assays required to confirm TF Gene status.	2169022	DNA Binding	Human	Strong	E4F purified from nuclear extracts of HeLa cells or Ad5-infected HeLa cells binds to the E4wt probe in gel retardation assays. Results confirmed with studies involving UV cross-linking and nuclease digestion. Experiments conducted with appropriate controls.
ENSG00000167986	DDB1	5274.66	4085.27	0.36562	damage specific DNA binding protein 1		Debra Fulton	TF Gene Candidate	Transcription Factor Binding: tf co-factor binding; Single stranded RNA/DNA binding		12145536	Non-specific DNA	Human	Strong	Paper: Identification of Rat DDB1, a Putative DNA Repair Protein, and Functional Correlation with Its Damaged-DNA Recognition Activity----- Damaged-DNA recognition activity has been identified as a complex of DDB1 (127-kD) and DDB2 (48-kD) subunits. Over-expression of DDB1 did not augment UV-damaged-DNA recognition activity in human HeLa, hamster V79, or rat PC12 cells. Restricting DDB2 expressio…
ENSG00000167986	DDB1	5274.66	4085.27	0.36562	damage specific DNA binding protein 1		Rob Sladek	TF Gene Candidate	Single stranded RNA/DNA binding	DDB1 (p127) and DDB2 (p48) form subunits of the damage-specific DNA binding protein. The DDB1 subunit binds DNA nonspecifically to DNA containing UV radiation photoproducts, while the DDB2 subunit interacts with p300.	12034848	DNA Binding	Human	Strong	DDB1 binds nonspecifically to UV-damaged DNA based on EMSA studies using UV-irradiated double-stranded DNA prepared from 60-mer oligonucleotides.
ENSG00000167986	DDB1	5274.66	4085.27	0.36562	damage specific DNA binding protein 1		Debra Fulton	TF Gene Candidate	Transcription Factor Binding: tf co-factor binding; Single stranded RNA/DNA binding		9418871	Co-activation	Human	Strong	Paper: DDB, a Putative DNA Repair Protein, Can Function as a Transcriptional Partner of E2F1------------Expression of DDB stimulated transcription from the E2F1 promoter (CAT reporter assay). The interaction between DDB and E2F1 can also be detected by coimmunoprecipitation experiments.Used Gal4 fusion constructs containing E2F1 and a reporter CAT gene containing five Gal4-binding sites demonstra…
ENSG00000167986	DDB1	5274.66	4085.27	0.36562	damage specific DNA binding protein 1		Jared Roach	TF Gene Candidate	Transcription Factor Binding: tf co-factor binding	Ddb1 is known in the literature as a DNA repair enzyme component. Co-immunoprecipitation studies indicate Ddb1 binds p300, a histone acetyltransferase.	12034848	Non-specific DNA	Human	Strong	The p127 subunit of UV-DDB binds in vivo to p300, a histone acetyltransferase, in co-immunoprecipitation studies in lymphoblastoid cells.
ENSG00000168505	GBX2	63.4383	20.7343	1.4242	gastrulation brain homeobox 2	Helix-Turn-Helix Group/Homeodomain Family	Amy Ticoll	TF Gene	DNA-Binding: sequence-specific	EMSA indicates GBX2 specifically binds the IL-6 promoter. Transfection assays show down-regulation of the expression of GBX2 in PC3 human prostate cancer cells is correlated with decreased expression of IL-6 in vitro.	10690529	DNA Binding	Human	Medium	EMSA using a purified GST-GBX2 fusion protein indicates GBX2 specifically binds the IL-6 promoter.
ENSG00000169564	PCBP1	2584.22	1848.03	0.4756	poly(rC) binding protein 1		Alice Chou	TF Gene Candidate	Single stranded RNA/DNA binding	alpha-CP1 factor transactivates a-CP1 factor-binding sites ligated to the a-globin TATAA box in MEL cells.	2233727	Transactivation	Human	Medium	In vitro transcription reactions of the a-CP1 factor-binding sites ligated to the a-globin TATAA box mediates stimulation of a-globin gene transcription in MEL cells. Deletions that remove these binding sites significantly reduced promoter activity. Depleted extracts of free a-CP1 results in a threefold drop in the transcriptional activity of the a-CP1/TATAA template. Activity is restored by addi…
ENSG00000170485	NPAS2	1522.66	243.652	2.5337	neuronal PAS domain protein 2	Zipper-Type Group/Helix-Loop-Helix Family	Amy Ticoll	TF Gene	DNA-Binding: sequence-specific	NPAS2:BMAL1 binds DNA in EMSA. NPAS2:BMAL1 expression induces accumulation of LDHA mRNA in cotransfected cells.	11441146	DNA Binding	Human	Medium	NPAS2:BMAL1 binds DNA in EMSA. NPAS2:BMAL1 expression induces accumulation of LDHA mRNA in cotransfected human embryonic kidney 293 cells.
ENSG00000170689	HOXB9	136.278	247.179	-0.82518	homeo box B9	Helix-Turn-Helix Group/Homeodomain Family	Andrew Kwon	TF Gene	Transcription Factor Binding: tf co-factor binding; DNA-Binding: sequence-specific	Various EMSA and transfection studies show that HOXB9 can bind to specific DNA, activate transcription, and interact with other transcription factors.	10617598	Co-activation; DNA Binding; Transactivation	Human	Strong	EMSA with GST-HOXB9 and HBSII oligo results in a retarded complex that is competed by unlabeled HBSII, but not by mutated HBSII, and supershifted by GST Ab. Adding his-Btg2 is added to the mix, an additional retarded band is seen, and this band is also competed by unlabled HBSII, and his-Btg2 alone does not result in a retarded band, while it results in a stronger band for HOXB9-DNA. CAT reporter…
ENSG00000171681	ATF7IP	1615.99	1016.56	0.65851	activating transcription factor 7 interacting protein		Wyeth Wasserman	TF Gene	Transcription Factor Binding: tf co-factor binding	aka mAM (mouse ATFa-associated Modulator)It colocalizes and interacts with ATFa in mammalian cells, contains a bipartite nuclear localization signal and possesses an ATPase activity. PMID 10777215 atp-ase activity; colocalization with atfa; Y2H interaction with ATFa	14536086	Co-activation; TF PPI	Human	Medium	ESET/SETDB1 is a histone methyltransferase (HMTase). Here, we show that SETDB1 tightly associates with the human homolog of mAM.promoter H3-K9 trimethylation causes transcriptional repression; mAM/hAM facilitates conversion of H3-K9 dimethyl to trimethyl by ESET/SETDB1
ENSG00000171703	TCEA2	502.471	1034.23	-1.0112	transcription elongation factor A (SII), 2		Amy Ticoll	TF Gene	Basal Transcription Factor; Transcription Factor Binding: tf co-factor binding	TFIIS (Tcea2) is a transcription elogation factor that binds a complex containing RNA polymerase II and the general transcription factors. TFIIS interacts with GRIP1&#964; in a yeast two-hybrid screen and coimmunoprecipitation assays. Cotransfection assays suggest TFIIS enhances transcriptional activation by GRIP1&#964;.	9305922	TF PPI	Human	Strong	HeLa whole cell extract is chromatographed on affinity columns containing immobilized TFIIS (Tcea2). TFIIS binds a complex containing RNA polymerase II and the general transcription factors.
ENSG00000173039	RELA	3284.51	2282.1	0.52049	v-rel reticuloendotheliosis viral oncogene homolog A (avian)	Other/Rel Homology Region Family	Elodie Portales-Casamar	TF Gene	DNA-Binding: sequence-specific	relA is the p65 subunit of NFkappaB. It activates a lot of different genes under a lot of different conditions.	1935902	DNA Binding; Transactivation	Human	Strong	RelA strongly activates a gene reporter construct carrying a consensus NFkappaB binding site in COS7 cells.A RelA-GAL4 fusion protein can bind a Gal4 site as well as a NFkappaB site (EMSA).
ENSG00000173039	RELA	3284.51	2282.1	0.52049	v-rel reticuloendotheliosis viral oncogene homolog A (avian)	Other/Rel Homology Region Family	Elodie Portales-Casamar	TF Gene	DNA-Binding: sequence-specific	relA is the p65 subunit of NFkappaB. It activates a lot of different genes under a lot of different conditions.	15485852	DNA Binding	Human	Strong	RelA binds to the IL-8 promoter (EMSA and ChIP experiements in BEAS-2B cells).
ENSG00000175054	ATR	1188.1	662.779	0.8295	ataxia telangiectasia and Rad3 related		Magdalena Swanson	TF Gene Candidate	Transcription Regulatory Activity: heterochromatin interaction/binding; Transcription Factor Binding: tf co-factor binding; Single stranded RNA/DNA binding	Atr is a TF gene candidate. The endogenous human protein was found to coprecipitate with members of the nucleosome remodeling and deacetylating complex, namely CHD4, HDAC2, MTA1, and MTA2, in immunoprecipitation studies. Recombinant human ATR was shown to preferentially bind UV-damaged DNA in pull-down assays. Kinase assays showed that the recombinant protein can phosphorylate recombinant human p…	12011431	DNA Binding	Human	Medium	In a pull-down assay, ATR was shown to preferentially bind UV-damaged DNA over unmodified DNA when human Flag-tagged ATR was purified from HEK293T cells and incubated with labelled UV (6-4) photoproduct DNA or the unmodified 46bp oligomer. In vitro kinase assays carried out in the presence or absence of UV-damaged DNA showed that recombinant human ATR can phosphorylate recombinant human p53 and t…
ENSG00000175054	ATR	1188.1	662.779	0.8295	ataxia telangiectasia and Rad3 related		Magdalena Swanson	TF Gene Candidate	Transcription Regulatory Activity: heterochromatin interaction/binding; Transcription Factor Binding: tf co-factor binding; Single stranded RNA/DNA binding	Atr is a TF gene candidate. The endogenous human protein was found to coprecipitate with members of the nucleosome remodeling and deacetylating complex, namely CHD4, HDAC2, MTA1, and MTA2, in immunoprecipitation studies. Recombinant human ATR was shown to preferentially bind UV-damaged DNA in pull-down assays. Kinase assays showed that the recombinant protein can phosphorylate recombinant human p…	10545197	Other	Human	Strong	Human ATR immunoprecipitate was significantly enriched for CHD4, HDAC2, MTA1, and MTA2 when ATR was immunoprecipitated from HeLa cell extracts using conjugated anti-ATR beads. CHD4, HDAC2, MTA1, and MTA2 were detected by Western blot.
ENSG00000175592	FOSL1	19714.5	6709.64	1.522	fos-like antigen 1	Zipper-Type Group/Leucine Zipper Family	Shannan HoSui	TF Gene	Transcription Factor Binding: tf co-factor binding; DNA-Binding: sequence-specific	Fra-1 is one component of the AP-1 transcription factor, which consists of a complex mixture of polypeptides that are encoded by the immediate-early genes of the fos and jun families. Thethree Jun proteins (c-Jun, JunB, and JunD) and the four Fos family members (c-Fos, FosB, Fra-1, and Fra-2) share a homologous region containing the basic DNA-binding domain and the leucine zipper dimerization mot…	15608675	DNA Binding	Human	Strong	Inducible MCF7-Fra-1 cells were analysed for their ability to form AP-1 complexes by electrophoretic mobility shift assays using a consensus TRE oligonucleotide. Sp1 DNA-binding activity was tested in parallel as a control of the efficiency of nuclear protein extraction in the different cell extracts. Higher protein binding to TRE was detected in MCF7-Fra-1 cells in the absence of doxycycline tha…
ENSG00000175592	FOSL1	19714.5	6709.64	1.522	fos-like antigen 1	Zipper-Type Group/Leucine Zipper Family	Shannan HoSui	TF Gene	Transcription Factor Binding: tf co-factor binding; DNA-Binding: sequence-specific	Fra-1 is one component of the AP-1 transcription factor, which consists of a complex mixture of polypeptides that are encoded by the immediate-early genes of the fos and jun families. Thethree Jun proteins (c-Jun, JunB, and JunD) and the four Fos family members (c-Fos, FosB, Fra-1, and Fra-2) share a homologous region containing the basic DNA-binding domain and the leucine zipper dimerization mot…	7504176	DNA Binding	Human	Weak	Fra1 has a conserved bZIP domain. Ability of Fra1 to bind DNA as part of a complex with c-Jun protein was confirmed by EMSA. The C terminus of nontransforming Fra1 did not function as a transcriptional activator when fused to the DNA-binding domain of GAL4.
ENSG00000177374	HIC1	602.413	211.597	1.4468	hypermethylated in cancer 1	Zinc-coordinating Group/BetaBetaAlpha-zinc finger Family	Rob Sladek	TF Gene	DNA-Binding: sequence-specific	A consensus HIC1 biding sequence (5'-GGG(T/G)TGCCC(G/C)CN(G/C)GCC-3') was identified by binding site selection (SAAB) using FLAG epitope-tagged HIC1 (AA 348 to 714) expressed in reticulocyte lysates. HIC1 binding to the an oligonucleotide selected by FLAG-HIC1 and matching the consensus sequence (HiRE) was confirmed in gel shift assays.HIC1 represses transcription mediated by a reporter containin…	15231840	DNA Binding; Transactivation	Human	Strong	A consensus HIC1 biding sequence (5'-CCGGGTGCCC(G/C)(G/C)(G/C)-3') was identified by binding site selection (SAAB) using a bacterially expressed, affinity purified GST-HIC (AA 348 to 714) fusion protein. A parallel experiment, using FLAG epitope-tagged HIC1 (AA 348 to 714) expressed in reticulocyte lysates, identified a longer but less stringent HIC1 consensus binding sequence (5'-GGG(T/G)TGCCC(G…
ENSG00000177426	TGIF1	1090.71	644.083	0.74211	TG interacting factor 1	Helix-Turn-Helix Group/Homeodomain Family	Debra Fulton	TF Gene	DNA-Binding: sequence-specific	Tgif is a transcription factor. It binds a specific DNA sequence (by EMSA/competion and selection amplification experiments). It prevents RXRalpha from functioning as a transcriptional activator by interacting with the RXR alpha response element (by EMSA). As such, it acts as a corepressor of RXRalpha-dependent transcriptional activation (by reporter assay).	8537382	DNA Binding; Transactivation	Human; Other; Rat	Strong	EMSA/competition assays and selection/amplification experiments identify DNA sequence-specific binding of TGIF. Human glioma U87 or COS-1 cell lines were transfected with vectors expressing RXRalpha and/or TGIF cellular retinol-binding protein promoter reporter demonstrating that TGIF acts as a repressor of RXRalpha-dependent transcriptional activation.Co-immunoprecipitate RXRalpha with specific …
ENSG00000177463	NR2C2	418.958	206.073	0.98951	nuclear receptor subfamily 2, group C, member 2	Zinc-coordinating Group/Hormone-nuclear Receptor Family	Amy Ticoll	TF Gene	DNA-Binding: sequence-specific	EMSA shows a specific binding between TR4 (Nr2c2) and the CNTFR-DR1. CAT assay demonstrates CNTFR-alpha can be induced by TR4 in a dose-dependent manner.	9006963	DNA Binding	Human	Medium	EMSA shows a specific binding between in vitro expressed TR4 (Nr2c2) and the CNTFR-DR1.
ENSG00000178691	SUZ12	1179.86	835.326	0.48974	suppressor of zeste 12 homolog (Drosophila)		Amy Ticoll	TF Gene	Transcription Factor Binding: tf co-factor binding	SUZ12 binds preferentially to a region within the promoter of the human HoxA9 gene. SUZ12 knockdown in HeLa cells results in cell growth defects, which correlates with upregulation of a number of Hox genes.Seems to be involved in protein-protein interactions with TFs not sequence specific binding (PMID 16751344). WWWW	15225548	DNA Binding	Human	Medium	SUZ12 binds preferentially to a region within the promoter of the human HoxA9 gene as seen with ChIP assays in HeLa cells.
ENSG00000178913	TAF7	524.738	727.893	-0.46555	TAF7 RNA polymerase II, TATA box binding protein (TBP)-associated factor		Amy Ticoll	TF Gene	Basal Transcription Factor	TAF7 is associated with PIC (preinitiation complex) on an immobilized DNA template. PIC contains major TFIID components, TAF1 and TAF4, and RNA Pol II.	16407123	TF PPI	Human	Strong	TAF7 is associated with PIC (preinitiation complex) on an immobilized MHC class I promoter template. PIC is purified from HeLa nuclear extract and contains major TFIID components, TAF1 and TAF4, and RNA Pol II.
ENSG00000179094	PER1	166.244	416.692	-1.2911	period homolog 1 (Drosophila)		David Martin	TF Gene Candidate		Reporter assays suggest Per1 acts as a co-repressor.	9856465	Other	Human; Mouse	Medium	co-repression : luciferase reporter assays in cultured NIH-3T3 mouse fibroblast cells into which expression plasmids for full-length CLOCK, BMAL1 (two activators of the promoter construct), hTIM, and mPER1 had been transfected in various combinations. mPER1 repress significantly the expression level.
ENSG00000179348	GATA2	0.270957	5.38911	-1.2206	GATA binding protein 2	Zinc-coordinating Group/GATA Domain Family	Debra Fulton	TF Gene	DNA-Binding: sequence-specific	Gata-2 is a transcription factor. It binds both ICAM-2 and MMP-2 promoter DNA sequences by EMSA/supershift assays and transfactivates the ICAM-2 promoter- and MMP-2-promoter reporter genes.	14512418	DNA Binding	Human; Other; Rat	Strong	Supershift assays with GATA-s antibodies in GATA-2 protein binds to the MMP-2 promoter sequence. Cotransfectin of GATA-2 in COS-7 cells transactivates a MMP-2 promoter-luciferase construct.
ENSG00000179348	GATA2	0.270957	5.38911	-1.2206	GATA binding protein 2	Zinc-coordinating Group/GATA Domain Family	Debra Fulton	TF Gene	DNA-Binding: sequence-specific	Gata-2 is a transcription factor. It binds both ICAM-2 and MMP-2 promoter DNA sequences by EMSA/supershift assays and transfactivates the ICAM-2 promoter- and MMP-2-promoter reporter genes.	9565596	DNA Binding; Transactivation	Human	Strong	Mutational promoter analysis using ICAM-2 promoter-luciferase reporter gene construct identify important regulatory elements. EMSA assay determines GATA-2 binding to ICAM-2 promoter element. GATA-2 expressed in COS cells transactivates an ICAM-2 promoter-luciferase reporter gene.
ENSG00000181690	PLAG1	5.85298	70.901	-3.0194	pleiomorphic adenoma gene 1	Zinc-coordinating Group/BetaBetaAlpha-zinc finger Family	Debra Fulton	TF Gene	DNA-Binding: sequence-specific	Plag1 is a transcription factor. Plag1 binds a consensus sequence composed of a core GRGGC followed 6¨C8 nucleotides further by a cluster of at least three guanidines (G-cluster) (by cyclic amplification and selection of targets and EMSA). Plag1 stimulates an artificial promoter-reporter composed of six copies of the minimal consensus sequences and also binds and activates IGF-II promoter-reporte…	10646861	DNA Binding; Transactivation	Human	Strong	CASTing (cyclic amplification and selection of targets) using a fusion protein GST-PLAG1 reveals a consensus sequence composed of a core GRGGC followed 6?8 nucleotides further by a cluster of at least three guanidines (G-cluster).PLAG1 binds the DNA consensus sequence by EMSA (mutational analysis). Cotransfection of six copies of the minimal consensus sequences - reporter gene into the fetal kidn…
ENSG00000184481	FOXO4	118.796	231.108	-0.91575	forkhead box O4	Winged Helix-Turn-Helix/Forkhead Domain Family	Alice Chou	TF Gene Candidate	DNA-Binding: sequence-specific	AFX transactivates a luciferase reporter containing BCL6 promoter region in 293E cells. AFX binds to the S6 site on BCL6 promoter in vitro.	11777915	DNA Binding; Transactivation	Human	Strong	Co-transfections of AFX expression vector and luciferase reporter containing BCL6 promoter region (with truncations) in 293E cells demonstrate that AFX can transactivate the reporter construct. EMSA using wild-type and mutant AFX DNA-binding domains identifies the S6 site on BCL6 promoter.
ENSG00000185507	IRF7	594.484	1756.91	-1.5257	interferon regulatory factor 7	Winged Helix-Turn-Helix/Interferon Regulatory Factor	Debra Fulton	TF Gene	DNA-Binding: sequence-specific	Irf7 is a transcription factor. The Irf7 activation domain is located in the carboxyl-terminal region (by Gal4 DNA binding domain assay) and it binds an IFNA4 promoter DNA element (by EMSA). Irf7 has been shown to activate a murine IFNA4 promoter-reporter.	9786932	DNA Binding; Transactivation	Human; Mouse	Strong	GAL4 DNA binding domain assay with carboxyl-terminal deletions demonstrates that the Irf7 activation domain is in the carboxyl-terminal region of the protein. Transient transfection in L929 cells with a murine IFNA4 promoter-reporter and IRF-7 expression plasmids demonstrate that IRF-7 activates the reporter gene. EMSAs demonstrate that to IRF-7 binds an IFNA4 promoter DNA element.
ENSG00000185551	NR2F2	1936.95	1392.93	0.46719	nuclear receptor subfamily 2, group F, member 2	Zinc-coordinating Group/Hormone-nuclear Receptor Family	Sarav Sundararajan	TF Gene	DNA-Binding: sequence-specific		8622679	DNA Binding; Transactivation	Human; Mouse	Strong	Demonstrate binding of COUP-TFII to the HNF1 promoter by DNase1 footprinting, gel-shift and CAT reporter assays.
ENSG00000185697	MYBL1	541.443	764.171	-0.48483	myeloblastosis oncogene-like 1	Helix-Turn-Helix Group/Myb Domain Family	Sarav Sundararajan	TF Gene	DNA-Binding: sequence-specific		7987850	DNA Binding; Transactivation	Human	Strong	The authors show that A-myb interacts specifically with Myb-binding sites of the c-myb responsive promoters. Also, reporter assays show that A-Myb is a potent transactivator.
ENSG00000185920	PTCH1	17.6315	40.5299	-1.03	patched homolog 1		Amy Ticoll	TF Gene Candidate		Luciferase reporter assays in transfected HEK-293 cells indicate PTCH1 inhibits activation of GL1. Similar experiment with 12 GLI-binding sites as a tandem repeat suggests inhibition of GLI1 activity by PTCH1 is via GLI-binding sites. No experiments found showing direct binding of PTCH1 to DNA.	16229683	DNA Binding	Human	Weak	Luciferase reporter assays in transfected HEK-293 cells indicate PTCH1 inhibits activation of GL1. Similar experiment with 12 GLI-binding sites as a tandem repeat suggests inhibition of GLI1 activity by PTCH1 is via GLI-binding sites.
ENSG00000186951	PPARA	39.7615	141.08	-1.6895	peroxisome proliferator activated receptor alpha	Zinc-coordinating Group/Hormone-nuclear Receptor Family	Sarav Sundararajan	TF Gene	DNA-Binding: sequence-specific		9748239	DNA Binding; Transactivation	Human	Strong	The authors show that PPARa/RXRa heterodimers bind to the rat Apo-A1-A site through gel retardation assays. PPAR-alpha was also shown to activate the human, but not rat Apo-A1-A by CAT reporter assays.
ENSG00000187098	MITF	73.6134	41.0375	0.7594	microphthalmia-associated transcription factor	Zipper-Type Group/Helix-Loop-Helix Family	Elodie Portales-Casamar	TF Gene	DNA-Binding: sequence-specific	MITF binds and transactivates various promoters. It was demonstrated with a broad range of experiments.	14737107	DNA Binding; Transactivation	Human; Mouse	Strong	MITF directly binds to the promoter region of c-fos (chIP assay and DNA-binding assay with oligonucleotide-conjugated beads).MITF transactivates the promoter region of c-fos (reporter gene assay in 293T cells).
ENSG00000187098	MITF	73.6134	41.0375	0.7594	microphthalmia-associated transcription factor	Zipper-Type Group/Helix-Loop-Helix Family	Elodie Portales-Casamar	TF Gene	DNA-Binding: sequence-specific	MITF binds and transactivates various promoters. It was demonstrated with a broad range of experiments.	15716956	DNA Binding; Transactivation	Human	Strong	MITF binds to a human p21Cip1 E2 element (EMSA and ChIP assay from 501mel or melan-a cells).MITF can transactivate a reporter gene carrying this p21Cip1 E2 element.
ENSG00000189403	HMGB1	4150.76	3225.14	0.35931	high mobility group box 1		Stuart Lithwick	TF Gene	Transcription Factor Binding: tf co-factor binding	Hmgb1 is a transcriptional cofactor, which binds other transcription factors in order to regulate transcription. Luciferase reporter gene expression increases upon cotransfection of a SREBP-1 expression vector and a lucriferase reporter vector into human kidney cells, but this change in expression is further increased upon the additional transfection of a Hmgb1 expression vector. Also, Hmgb1 bind…	16040616	Co-activation; Other	Human; Mouse	Strong	In a cotransfection assay, in which a mouse expression vector for either SREBP-1 or SREBP-2 was transfected into human embryonic kidney 293 cells along with a reporter vector (Sterol regulatory element (SRE) fused to Luciferase), reporter expression increased five-fold relative to expression vector alone. With the further transfection of a Hmgb1 expression vector, reporter expression further incr…
ENSG00000196235	SUPT5H	4966.89	4014.54	0.30476	suppressor of Ty 5 homolog (S. cerevisiae)		Elodie Portales-Casamar	TF Gene	Transcription Factor Binding: tf co-factor binding	Spt5 is part of DSIF, DRB sensitivity-inducing factor ( DRB being the transcription inhibitor 5,6-dichloro-1-beta-D-ribofuranosylbenzimidazole).DSIF is a dual regulator of transcription that stimulates, or, when cooperating with negative elongation factor (NELF), represses RNA polymerase II (RNAPII) elongation. Spt4 and Spt5 are also thought to be involved in mRNA capping, homologous DNA recombin…	9450929	Other	Human	Medium	DSIF (Spt4 + Spt5) induces the arrest of elongating RNA Pol II in the absence of DRB, indicating that DSIF works as a negative elongation factor (purified DSIF in a partially reconstituted transcription system).DSIF can stimulate transcription elongation under certain conditions (in vitro transcription system).
ENSG00000196235	SUPT5H	4966.89	4014.54	0.30476	suppressor of Ty 5 homolog (S. cerevisiae)		Elodie Portales-Casamar	TF Gene	Transcription Factor Binding: tf co-factor binding	Spt5 is part of DSIF, DRB sensitivity-inducing factor ( DRB being the transcription inhibitor 5,6-dichloro-1-beta-D-ribofuranosylbenzimidazole).DSIF is a dual regulator of transcription that stimulates, or, when cooperating with negative elongation factor (NELF), represses RNA polymerase II (RNAPII) elongation. Spt4 and Spt5 are also thought to be involved in mRNA capping, homologous DNA recombin…	10757782	Other	Human	Medium	SPT5 interacts with SPT4, RNA polymerase II and CDK9 (co-IP in COS cells).Both DRB inhibition and Tat activation can be restored by the addition of purified SPT4 and SPT5 to fractionated HeLa nuclear extract that is not competent for either DRB inhibition or Tat activation.
ENSG00000196498	NCOR2	13118.4	9673.22	0.43206	nuclear receptor co-repressor 2		David Martin	TF Gene Candidate	Transcription Factor Binding: tf co-factor binding	Probably a transcriptional co-repressor.	10097068	Other	Human; Mouse	Strong	Repression : a Gal4 DNA binding domain linked to SMRTe efficiently represses basal transcription from a luciferase reporter containing four copies of Gal4 binding sites.
ENSG00000196628	TCF4	152.2	241.651	-0.64625	transcription factor 4	Zipper-Type Group/Helix-Loop-Helix Family	Debra Fulton	TF Gene	DNA-Binding: sequence-specific	Tcf4 is a transcription factor. It binds DNA (by EMSA analysis) in a complex with TFIIB and transactivates an SSTRinr-reporter in human and mouse neuroblastoma cells. However, it does not transactive the reporter gene in HeLa and NIH 3T3 cells suggesting that additional factors may be needed for SEF-2 activation in the neuroblastoma cells.	8978694	DNA Binding; TF PPI; Transactivation	Human; Mouse	Strong	Various hSSTR2 promoter-reporter genes traniently transfected into SSTR2 expression human and mouse neuroblastoma cells lines demonstrate that transcriptional activity depends on the presence of an initiator element (E-box-inr). Co-transfections of Sef-2 expression plasmids and SSTRinr-reporter constructs in Neuro2Acells demonstrates that Sef-2 activates the reporter gene.Sef-2 fails to activate …
ENSG00000196782	MAML3	429.605	251.66	0.73791	mastermind like 3 (Drosophila)		Sarav Sundararajan	TF Gene Candidate	Transcription Factor Binding: tf co-factor binding	To be re-reviewed!! This gene can function as a coactivator, but also directly transactivate genes itself, although no evidence was found for direct DNA binding.	12370315	TF PPI; Transactivation	Human	Strong	Co-immunoprecipitation show that MAML2, ICN1, and CSL form a ternary complex. A GAL4(DBD)-MAML2 fusion protein can transactivate a UAS-luciferase reporter construct. The full-length MAML2 gene can also transactivate a HES1-luciferase construct.
ENSG00000197019	SERTAD1	300.403	404.965	-0.42219	SERTA domain containing 1		Elodie Portales-Casamar	TF Gene	Transcription Factor Binding: tf co-factor binding	SERTAD1 has benn shown to transactivate different promoters synergistically with different TF. It has also been shown to physically interact with different TF. It carries a transactivation domain but doesn't seem to bind directly to DNA.	16098148	Co-activation	Human	Strong	Expression of SERTAD1 strongly stimulates p53-dependent gene activation in HeLa and U2OS cells but not in p53-deficient Saos2 or p53-knockdown HeLa cells (gene reporter assay).SERTAD1 possesses an intrinsic transactivation activity (gene reporter assay with a GAL4 fusion protein).It interacts with the coactivator CREB-binding protein (co_IP of coexpressed proteins in COS cells).It cooperates syne…
ENSG00000197019	SERTAD1	300.403	404.965	-0.42219	SERTA domain containing 1		Elodie Portales-Casamar	TF Gene	Transcription Factor Binding: tf co-factor binding	SERTAD1 has benn shown to transactivate different promoters synergistically with different TF. It has also been shown to physically interact with different TF. It carries a transactivation domain but doesn't seem to bind directly to DNA.	11331592	Co-activation; Transactivation	Human; Mouse	Strong	A SERTAD1-GAL4 fusion protein stimulates both basal and enhancer-activated transcription, when recruited to a heterologous promoter bearing GAL4 DNA-binding sites, in both oncoprotein-transformed cells (293 and COS cells) and spontaneously immortalized LLC-PK1 porcine epithelial cells.There is a cooperative stimulation of E2F-1/DP-1 transcriptional activity by KRIP-1 and SERTAD1 (gene reporter as…
ENSG00000197323	TRIM33	1731.96	1218.4	0.50003	tripartite motif-containing 33		Elodie Portales-Casamar	TF Gene Candidate	Transcription Factor Binding: tf co-factor binding	Trim33 is part fo the TIF family of transcriptional cofactors.It was shown to homodimerize or hetero-dimerize with the other members of this family.It can lead to a strong repression of transcription when artificially linked to DNA.However, it doesn't seem to bind the other members' known targets and its specific function hasn't really been assess.	10022127	Other	Human; Mouse	Medium	GAL4 - Trim33 led to a strong repression of the reporter compared to GAL4 alone. In contrast, no reduction in CAT activity was detected by coexpressed Trim33 unfused to the GAL4 DBD, indicating that repression by TIF1gamma is dependent on DNA binding.TIF1gamma (Trim33) does not interact with any of the known TIF1alpha- and TIF1beta-partners but forms heterodimers with the other TIF1 proteins or h…
ENSG00000197323	TRIM33	1731.96	1218.4	0.50003	tripartite motif-containing 33		Elodie Portales-Casamar	TF Gene Candidate	Transcription Factor Binding: tf co-factor binding	Trim33 is part fo the TIF family of transcriptional cofactors.It was shown to homodimerize or hetero-dimerize with the other members of this family.It can lead to a strong repression of transcription when artificially linked to DNA.However, it doesn't seem to bind the other members' known targets and its specific function hasn't really been assess.	12096914	TF PPI	Human	Weak	In vivo association between TIF1&#945; and TIF1&#947; in 293 cells (co-IP).Expression of TIF1&#947; interferes with the corepression properties of TIF1&#945; and CMV-promoter driven GAL4-RXR (gene reporter assay in 293 cells).
ENSG00000198176	TFDP1	2808.59	2088.4	0.42181	transcription factor Dp 1	Winged Helix-Turn-Helix/Transcription Factor Family	Gwenael Breard	TF Gene	DNA-Binding: sequence-specific	The E2F transcription factor family regulates the expression of various cellular promoters, particularly those involved in the cell cycle. E2F factors bind to DNA as homodimers or heterodimers in association with dimerization partner DP1. TFDP1 may be the first example of a family of related transcription factors. The protein was isolated by virtue of its binding to a DNA sequence taken from the …	8446173	DNA Binding	Human	Strong	The protein was isolated by virtue of its binding to a DNA sequence taken from the adenovirus E2A promoter. TFDP1 is a component of the DRTF1/E2F transcription factor complex, which coordinates events in the cell cycle by interacting with RB1, the retinoblastoma gene product, and RB-related proteins.
ENSG00000198353	HOXC4	108.435	54.34	0.94304	homeo box C4	Helix-Turn-Helix Group/Homeodomain Family	Amy Ticoll	TF Gene	DNA-Binding: sequence-specific	HoxC4 is found to be specifically recruited to DNA containing the HoxC4-binding site in gel shift assays and ChIP experiments. Transfection assays indicate HoxC4 activates hs1,2 in vivo.	15252056	DNA Binding	Human	Strong	In direct gel shift assays involving 4B6 nuclear cell extracts, HoxC4 is found to be specifically recruited to radiolabeled DNA containing the HoxC4-binding site. Competition and antibody shift assays confirm the interaction. A GST-HoxC4 fusion protein binds specifically to the HoxC4-binding site in vitro. ChIP experiments demonstrate HoxC4 binds the region in vivo.
ENSG00000198517	MAFK	471.619	853.004	-0.83939	v-maf musculoaponeurotic fibrosarcoma oncogene family, protein K (avian)	Zipper-Type Group/Leucine Zipper Family	Debra Fulton	TF Gene	DNA-Binding: sequence-specific	MafK is a transcription factor. It can transactivate GPE1 (GST-P gene enhancer) reporter gene as a heterodimer with Nrf2. However, over-expression of MafK with Nrf2 transrepresses reporter gene activation which may be as a result of MafK homodimer formation (as determined by band and supershift assays).	11013233	DNA Binding; Other; Transactivation	Human	Medium	Transfection and over-expression of Hep-G2 cells with expression plasmids MafK and Nrf2 (determined by SDS-PAGE, Western analysis, and antibody probing) along with a ARE-Luciferase reporter gene demonstrates that MapK represses ARE-mediated luciferase gene expression and its activation by Nrf2. The binding of in vitro translated MafG-V5, MafK-V5, Nrf2, and Nrf1(confirmed by Western blotting and p…
ENSG00000198911	SREBF2	4057.55	1973.48	1.0224	sterol regulatory element binding factor 2	Zipper-Type Group/Helix-Loop-Helix Family	Amy Ticoll	TF Gene Candidate	DNA-Binding: sequence-specific	EMSA indicates SREBP-2 binds specifically to the SRE-1 element. Reporter assays in 293 cells show SREBP-2 stimulates promoters with this element.	7903453	DNA Binding	Human	Medium	EMSA indicates E Coli expressed and purified SREBP-2 binds to nucleotides containing tandem repeat copies of the SRE-1. Binding is reduced or abolished with mutation of the element.
ENSG00000204103	MAFB	45.8778	111.287	-1.1736	v-maf musculoaponeurotic fibrosarcoma oncogene family, protein B (avian)	Zipper-Type Group/Leucine Zipper Family	Amy Ticoll	TF Gene	Transcription Factor Binding: tf co-factor binding	GST pull-down assay indicates MafB interacts with c-fos. EMSA and ChIP assays suggest MafB proteins decrease c-fos binding to the NFATc1 promoter region by association with c-fos. In a transient transfection assay, MafB decreases the induction of luciferase activity by c-fos in a dose-dependent manner.	17158225	TF PPI	Human	Strong	GST pull-down assay indicates MafB interacts with DNA-binding transcription factor c-fos. EMSA and ChIP assays suggest MafB proteins decrease c-fos binding to AP1-binding sites in the NFATc1 promoter region by association with c-fos. Experiments conducted with appropriate controls.
ENSG00000204227	RING1	946.581	1236.5	-0.37928	ring finger protein 1		Elodie Portales-Casamar	TF Gene	Transcription Factor Binding: tf co-factor binding	RING1 interacts with multiple Polycomb-group proteins, forming a large multimeric protein complex that is involved in maintaining the transcriptionally repressive state of genes.RING1 is also able to inhibit the RBP-J-mediated transcriptional activation through the formation of a protein complex with KyoT2.No evidence was shown of a direct DNA binding.	12482919	Other	Human	Unknown	The PcG proteins HPC2, HPH1, BMI1 and RING1 are highly concentrated in the perichromatin compartment, situated at the surface of condensed chromatin domains. This compartment was demonstrated earlier to be the nuclear site where most pre-mRNA synthesis takes place. Interestingly, these PcG proteins are virtually absent from the interior of condensed chromatin areas. The present observations there…
ENSG00000204227	RING1	946.581	1236.5	-0.37928	ring finger protein 1		Elodie Portales-Casamar	TF Gene	Transcription Factor Binding: tf co-factor binding	RING1 interacts with multiple Polycomb-group proteins, forming a large multimeric protein complex that is involved in maintaining the transcriptionally repressive state of genes.RING1 is also able to inhibit the RBP-J-mediated transcriptional activation through the formation of a protein complex with KyoT2.No evidence was shown of a direct DNA binding.	14999091	Other; TF PPI	Human	Strong	RING1 interacts with KyoT2 through LIM domains in a yeast two-hybrid, GST-pull down and co-immuprecipitation experiments. RING1 binds to RBP-J through KyoT2. RING1 inhibits the RBP-J-mediated transcription in HEK-293 and COS7 cells (gene reporter assay).Suppression of RBP-J by RING1 is abrogated by KBP1, which competes with RING1 for binding to LIM domains of KyoT2 (co-immunoprecipitation, mammal…
ENSG00000204227	RING1	946.581	1236.5	-0.37928	ring finger protein 1		Elodie Portales-Casamar	TF Gene	Transcription Factor Binding: tf co-factor binding	RING1 interacts with multiple Polycomb-group proteins, forming a large multimeric protein complex that is involved in maintaining the transcriptionally repressive state of genes.RING1 is also able to inhibit the RBP-J-mediated transcriptional activation through the formation of a protein complex with KyoT2.No evidence was shown of a direct DNA binding.	9858531	TF PPI	Human; Mouse	Strong	RING1 interacts with multiple Polycomb-group proteins (Bmi-1, HPC2) in a yeast two-hybrid and GST-pull down assays. Polycomb-group (PcG) proteins form large multimeric protein complexes that are involved in maintaining the transcriptionally repressive state of genes.
ENSG00000213928	IRF9	11.9201	41.0715	-1.4684	interferon regulatory factor 9	Winged Helix-Turn-Helix/Interferon Regulatory Factor	Jared Roach	TF Gene	DNA-Binding: sequence-specific	Binds DNA; transactivation.	10497156	DNA Binding	Human	Medium	Binding to viral enhancer sequence in vitro
ENSG00000215021	PHB2	4960.16	3193.94	0.62866	prohibitin 2		Amy Ticoll	TF Gene	Transcription Factor Binding: tf co-factor binding	REA interacts directly with ER (estrogen receptor) in in vitro GST "pull-down" assays. REA is shown to interact with ER and Akt in yeast two-hybrid assays. PHB2 is specifically co-immunoprecipitated by Akt, MyoD and MEF2 but not by negative controls. PHB2 represses MyoD- or MEF2-dependent transcription in reporter assays of co-transfected C2C12 cells.	10359819	TF PPI	Human	Strong	REA is shown to interact with ER (estrogen receptor) in a yeast two-hybrid assay built from an MCF-7 breast cancer cell cDNA library. REA interacts directly with ER in in vitro GST "pull-down" assays. REA is not retained on the GST column without ER (or with GST alone).
ENSG00000215021	PHB2	4960.16	3193.94	0.62866	prohibitin 2		Amy Ticoll	TF Gene	Transcription Factor Binding: tf co-factor binding	REA interacts directly with ER (estrogen receptor) in in vitro GST "pull-down" assays. REA is shown to interact with ER and Akt in yeast two-hybrid assays. PHB2 is specifically co-immunoprecipitated by Akt, MyoD and MEF2 but not by negative controls. PHB2 represses MyoD- or MEF2-dependent transcription in reporter assays of co-transfected C2C12 cells.	15173318	TF PPI	Human	Strong	In a yeast two-hybrid screen, prohibitin 2 (PHB2) is found to specifically interact with Akt. PHB2 is specifically co-immunoprecipitated by regulatory factors Akt, MyoD and MEF2 but not by MKK6 or Six1 (negative controls) in Cos-7 cells co-transfected with PHB2.
ENSG00000244405	ETV5	1447.14	820.974	0.80027	ets variant gene 5	Winged Helix-Turn-Helix/Ets Domain Family	Rob Sladek	TF Gene	DNA-Binding: sequence-specific	ETV5 protein produced by in vitro translation in wheat germ extract binds to the E74 Ets-binding site in gel shift assays.ETV5 activates the human ICAM-1 minmal promoter and 3xE74-TK-Luc reporter plasmids following transient transfection in RK13 cells.Etv5 activates the murine bax promoter (bp ¨C2673 to ¨C1) following transient transfection in TAC-2.1 cells.	15857832	DNA Binding	Human	Strong	ERM protein produced by in vitro translation in wheat germ extract binds to the E74 Ets-binding site in gel shift assays.ERM activates the human ICAM-1 minmal promoter and 3xE74-TK-Luc reporter plasmids following transient transfection in RK13 cells.
ENSG00000253293	HOXA10	13.5152	0	2.3754	homeo box A10	Helix-Turn-Helix Group/Homeodomain Family	Jared Roach	TF Gene	DNA-Binding: sequence-specific	Hox gene with developmental activity is almost certainly a TF.	14512427	Co-activation	Human	Medium	Demonstrates results of EMSA with the HOXA10/PBX1A complex.
